# Supplementary material
Source: PubMed Central journal article supplement (PMC3060065)
Supplement: pgen.1001342.s001.pdf [file pgen.1001342.s001.pdf]

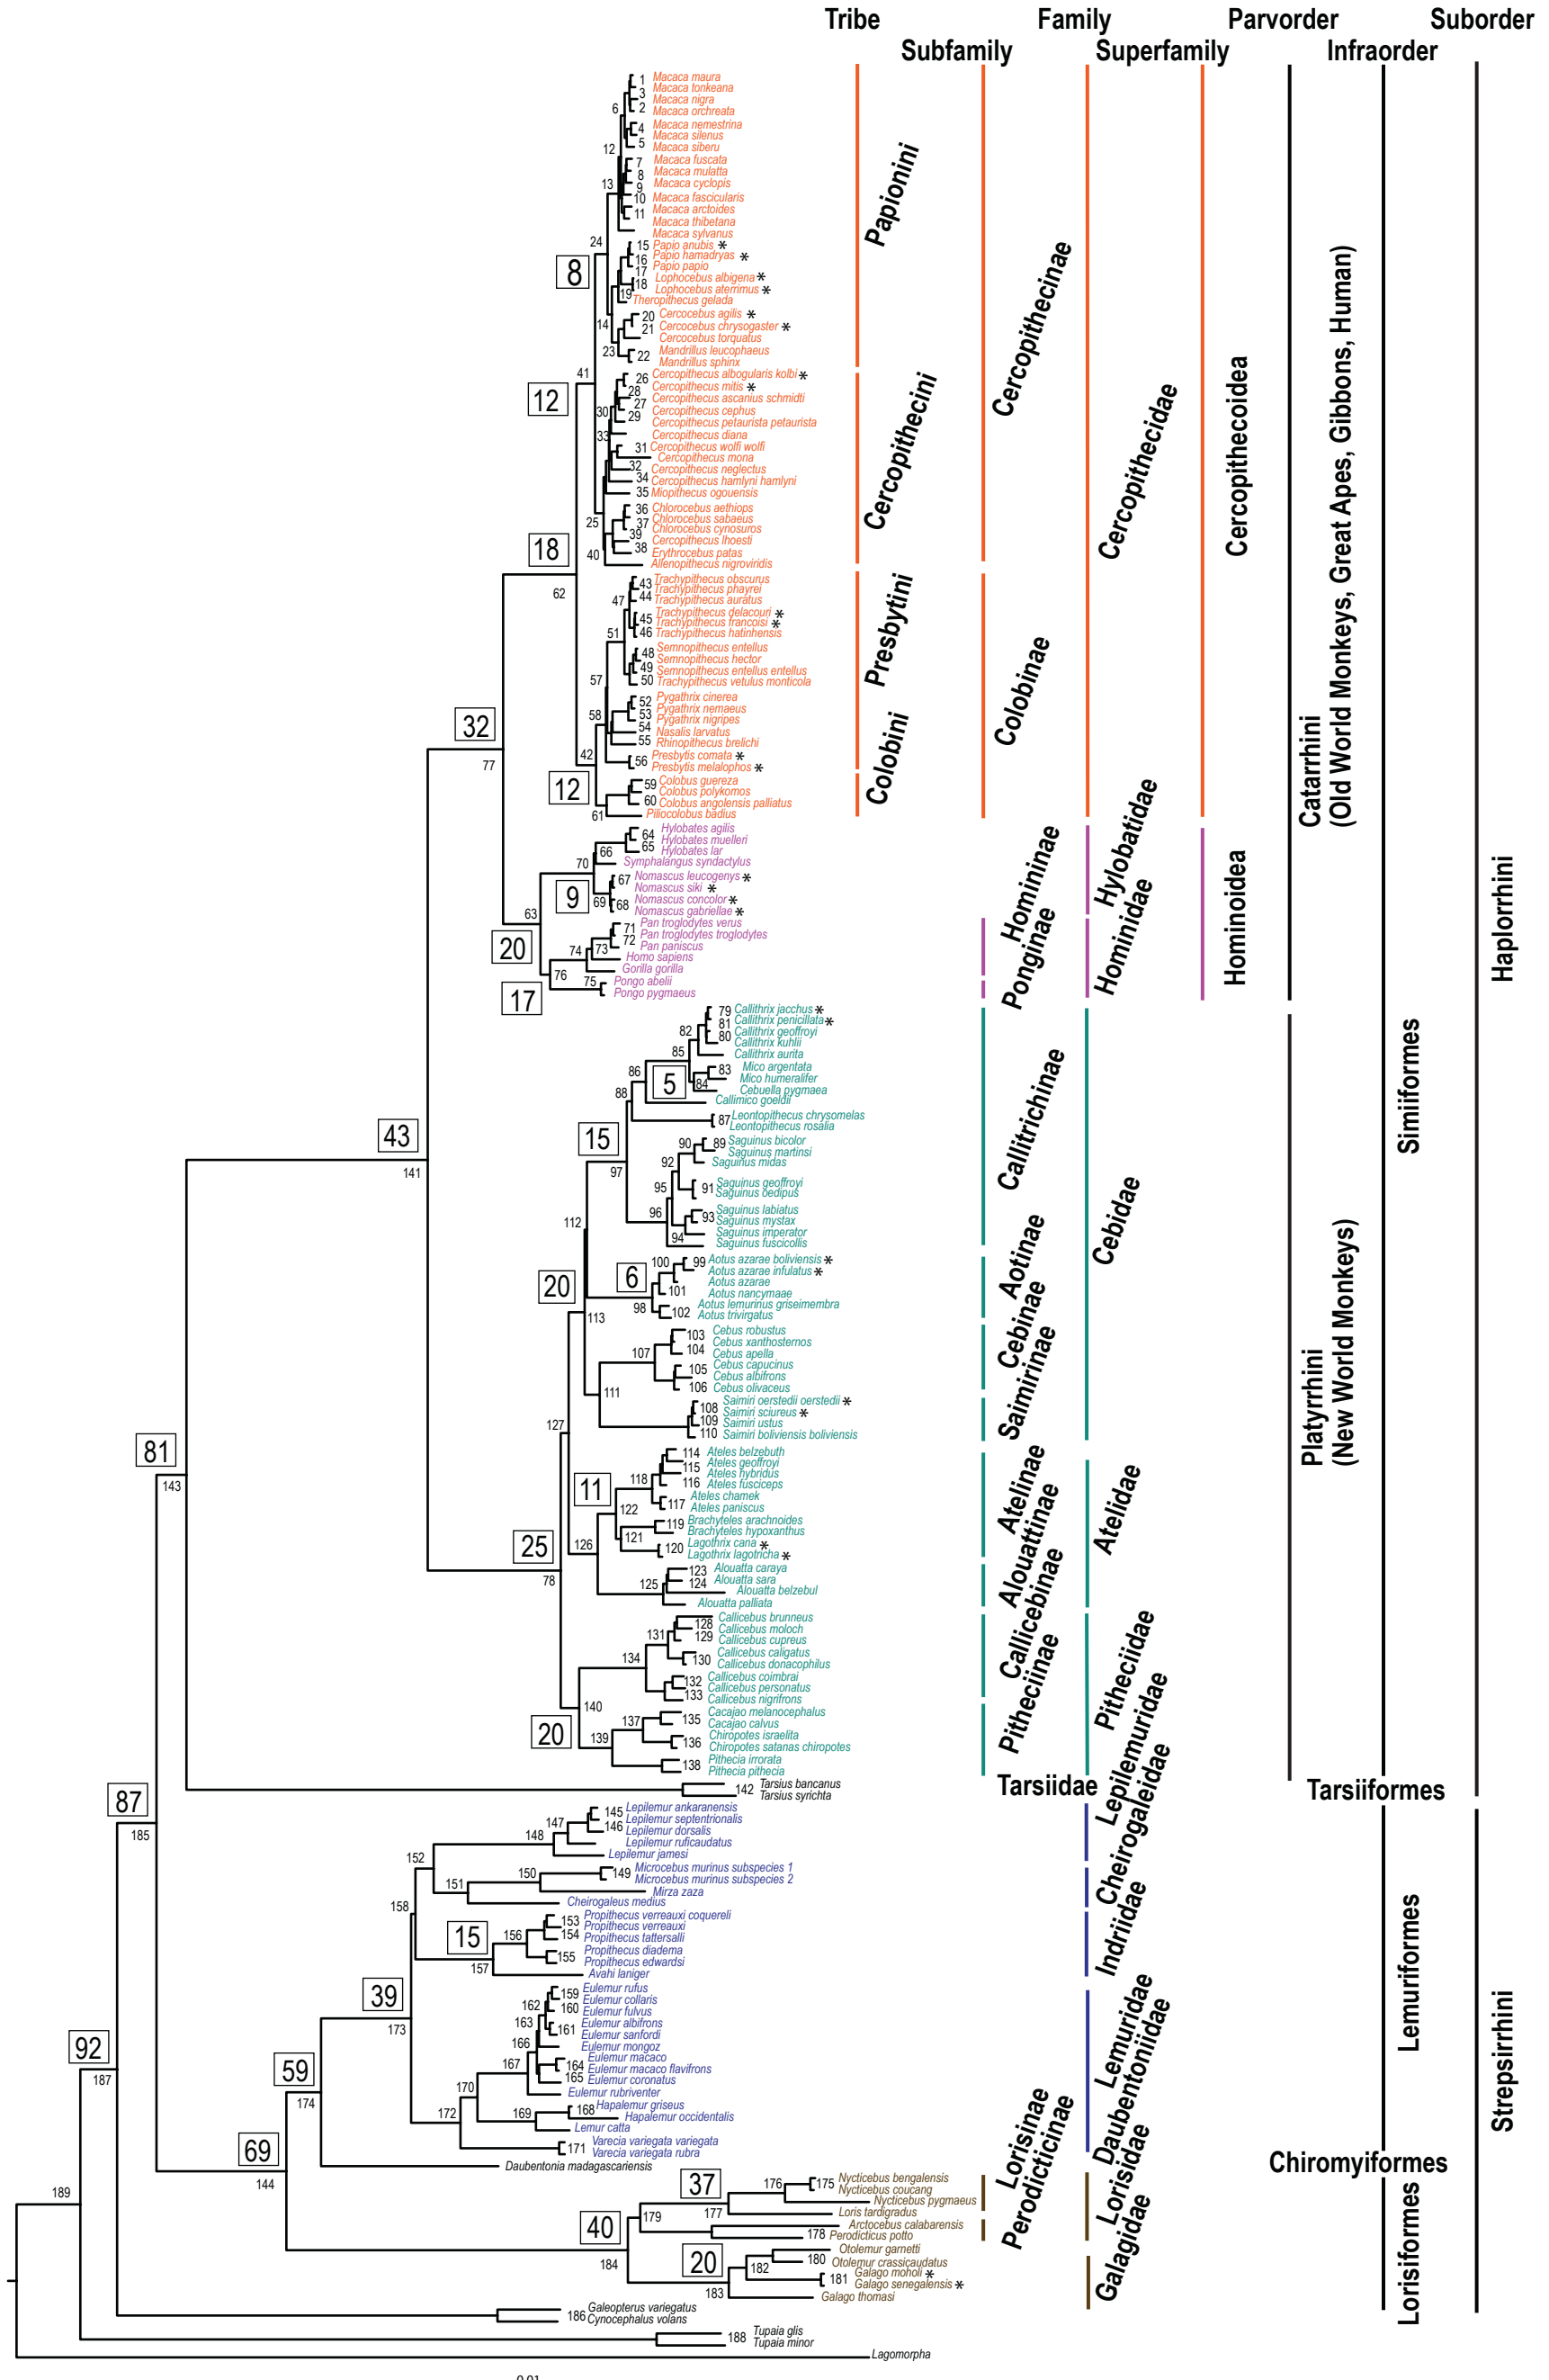

Tribe  
Subfamily  
Family  
Superfamily  
Parvorder  
Suborder

Papionini  
Cercopithecini  
Colobini  
Pongini  
Callitrichinae  
Aotinae  
Saimirinae  
Atelinae  
Callicebinae  
Pitheciinae  
Tarsiidae  
Lorisinae  
Perodicticinae  
Galagidae

Cercopithecinae  
Cercopitheciidae  
Colobinae  
Homininae  
Hominidae  
Cebinae  
Saimiriinae  
Atelidae  
Pitheciidae  
Lepilemuridae  
Cheirogaleidae  
Indriidae  
Lemuridae  
Daubentonidae

Cercopithecoidea  
Hominoidea

Catarrhini  
(Old World Monkeys, Great Apes, Gibbons, Human)

Platyrrhini  
(New World Monkeys)

Simiiformes

Tarsiiformes

Lemuriformes

Chiromyiformes

Lorisiformes

Haplorrhini

0.01
