# Supplementary material
Source: PubMed Central journal article supplement (PMC3060065)
Supplement: pgen.1001342.s014.pdf [file pgen.1001342.s014.pdf]

Table S1. List of DNA specimens used in study

| Code name | Genus          | Species        | Subspecies   | Common name                                     | Additional ID   | Gender | Captive/wild caught/born to wild caught | Geographic origin and sample origin                                                                      | Sample contributor/acknowledgement                                                  | Previous genetic information on the sample |
|-----------|----------------|----------------|--------------|-------------------------------------------------|-----------------|--------|-----------------------------------------|----------------------------------------------------------------------------------------------------------|-------------------------------------------------------------------------------------|--------------------------------------------|
| ABE-1     | Alouatta       | helzebul       |              | red-handed howler monkey                        | AB/S/N          | M      | unknown                                 | Centro Nacional de Primatas                                                                              | H. Seunaez                                                                          |                                            |
| ABZ-1     | Ateles         | helzebuth      |              | white-fronted Spider Monkey                     | OR126           | M      |                                         | The Center for Reproduction of Endangered Species, San-Diego, CA, US                                     | Oliver Ryder                                                                        |                                            |
| ACA-3     | Alouatta       | caraya         |              | black howler monkey                             | 2               | M      | wild caught                             | UHE-Serra da Mesa; Goias state, Brazil; Instituto national de Cancer - Genetics Division                 | Universidade Federal do Pará - Laboratório de Polimorfismos de DNA                  |                                            |
| ACL-1     | Arctocebus     | calabarensis   |              | Calabar angwantibo                              | A1              | U      | wild caught                             | National Museums Scotland, Great Britain                                                                 | A. Kitchener                                                                        | Roos et al. 2004, PNAS                     |
| ACM-1     | Ateles         | chamek         |              | Peruvian spider monkey, Chamek spider monkey    | 822             | M      | captive born                            | Zoo de Doue la Fontaine, France                                                                          | B. Lefaux                                                                           | no                                         |
| AFC-7     | Ateles         | fusciceps      |              | spider monkey                                   | 653             | M      | captive born                            | Landau Zoo, Germany                                                                                      | I.-O. Heckel                                                                        | no                                         |
| AGO-2     | Ateles         | geoffroyi      |              | black-handed spider monkey                      | Caleb           | M      | captive                                 | Catoctin Wildlife Park and Zoo, Thumont, MD, US                                                          | June Bellizzi, Melody Roelke                                                        |                                            |
| AHY-1     | Ateles         | hybridus       |              | variegated spider monkey, hybrid spider monkey  | 466             | M      | wild caught                             | Erfurt Zoo, Germany                                                                                      | M. Melcher                                                                          | no                                         |
| ALM-1     | Aotus          | lemurinus      | griseimembra | lemurine night monkey (Panamanian night monkey) | OR571           | F      |                                         | The Center for Reproduction of Endangered Species, San-Diego, CA, US                                     | Oliver Ryder                                                                        |                                            |
| ALN-1     | Avahi          | laniger        |              | woolly lemur                                    | 1057            | M      | wild                                    | Sainte Luce, Madagascar                                                                                  | Y. Rumpler                                                                          | Zaramody et al. 2006, Primate Report       |
| ANA-1     | Aotus          | nancymaeae     |              | Nancy Ma's Night Monkey, douroucouli            | KB9130          | F      |                                         | The Center for Reproduction of Endangered Species, San-Diego, CA, US                                     | Leona Chemnick                                                                      |                                            |
| ANI-1     | Allenopithecus | nigroviridis   |              | Allen's swamp monkey                            | PR00198         | F      |                                         | Coriell Cell Repositories, NJ, US                                                                        | Coriell Cell Repositories, NJ, US                                                   |                                            |
| APC-1     | Ateles         | paniscus       |              | black spider monkey                             |                 | M      | captive                                 | Fundação RioZoo                                                                                          |                                                                                     | 72 genes mapped to this animal             |
| APL-1     | Alouatta       | palliat        |              | hantled howler honkey                           | KB7527          | M      |                                         | The Center for Reproduction of Endangered Species, San-Diego, CA, US                                     | Leona Chemnick                                                                      |                                            |
| ASA-1     | Alouatta       | sara           |              | Bolivian red howler                             | OR749           | F      |                                         | The Center for Reproduction of Endangered Species, San-Diego, CA, US                                     | Oliver Ryder                                                                        |                                            |
| ATR-1     | Aotus          | trivirgatus    |              | owl monkey                                      | ATCC #: CRL1556 | U      | unknown                                 | ATCC                                                                                                     |                                                                                     |                                            |
| AZA-1     | Aotus          | azarae         |              | Southern owl Monkey                             | 664             | M      | captive born                            | Gettorf Zoo, Germany                                                                                     | U. Traxel                                                                           | no                                         |
| AZB-1     | Aotus          | azarae         | boliviensis  | feline night monkey                             | 9               | M      | born to wild caught                     | Instituto nacional de Cancer - Genetics Division                                                         | Centro Nacional de Primatas                                                         |                                            |
| AZI-1     | Aotus          | azarae         | infulatus    | feline night monkey                             | 10              | M      | wild caught                             | UHE - Tucuruí, para state, Brazil; Instituto nacional de Cancer - Genetics Division                      | Centro Nacional de Primatas                                                         |                                            |
| BAR-1     | Brachyteles    | arachnoides    |              | muriqui                                         | 15              | M      | wild caught                             | Instituto nacional de Cancer - Genetics Division                                                         | Centro de Primatologia do Estado do Rio de Janeiro                                  |                                            |
| BHY-1     | Brachyteles    | hypoxanthus    |              | spider monkey                                   | 13              | F      | wild caught                             | Instituto nacional de Cancer - Genetics Division                                                         | Centro de Primatologia do Estado do Rio de Janeiro                                  |                                            |
| CAB-1     | Cercopithecus  | albogularis    | kolbi        | Kolb's guenon                                   | OR394           | M      |                                         | The Center for Reproduction of Endangered Species, San-Diego, CA, US                                     | Oliver Ryder                                                                        |                                            |
| CAC-1     | Cercocebus     | agilis         |              | mangabey                                        | PR00608         | F      |                                         | Coriell Cell Repositories, NJ, US                                                                        | Coriell Cell Repositories, NJ, US                                                   |                                            |
| CAE-4     | Chlorocebus    | cynosuros      |              | malbrouck                                       | M Vervet        | M      |                                         | Africa, Botswana, Makgadikgadi National Park                                                             | Melody Roelke                                                                       |                                            |
| CAE-8     | Chlorocebus    | aethiops       |              | grivet monkey                                   | CAE             | M      | captive born                            | Serengeti Park Hodenhagen, Germany                                                                       | M. Boer                                                                             | Roos, unpublished                          |
| CAI-1     | Callithrix     | aurita         |              | white-eared marmoset                            | 28              | M      | born to wild caught                     | Instituto nacional de Cancer - Genetics Division                                                         | Centro de Primatologia do Estado do Rio de Janeiro                                  |                                            |
| CAM-1     | Cacajao        | melanocephalus |              | black uakari                                    | 17              | F      | captive                                 | Instituto nacional de Cancer - Genetics Division                                                         | Centro de Primatologia do Estado do Rio de Janeiro                                  |                                            |
| CAN-1     | Colobus        | angolensis     | palliat      | Eastern Angolan colobus                         | PR00099         | M      |                                         | Coriell Cell Repositories                                                                                | Coriell Cell Repositories                                                           |                                            |
| CAP-13    | Cebus          | apella         |              | brown capuchin monkey                           | Raviote "Ole"   | M      |                                         | Catoctin Wildlife Park and Zoo, Thumont, MD, US                                                          | Melody Roelke                                                                       |                                            |
| CAR-1     | Mico           | argentata      | argentata    | bare-ear marmoset                               | N-17173         | F      | wild                                    | probably provided by Dr Horacio Schneider, Universidade Federal do Pará Belem, Pará                      | probably provided by Dr Horacio Schneider, Universidade Federal do Pará Belem, Pará |                                            |
| CAS-1     | Cercopithecus  | ascanius       | schmidti     | black-cheeked white-nosed monkey                | PR00566         | M      |                                         | Coriell Cell Repositories                                                                                | Oliver Ryder                                                                        |                                            |
| CBS-1     | Callicebus     | brunneus       |              | brown titi monkey                               | 2360            | M      | wild caught                             | Jamari River, Rondônia State, Brazil; Universidade Federal do Pará - Laboratório de Polimorfismos de DNA | Universidade Federal do Pará - Laboratório de Polimorfismos de DNA                  |                                            |
| CCE-1     | Cercopithecus  | cephus         |              | mustached guenon                                | PR00531         | M      |                                         | Coriell Cell Repositories, NJ, US                                                                        | Coriell Cell Repositories, NJ, US                                                   |                                            |
| CCG-1     | Callicebus     | caligatus      |              | chestnut-bellied Titi                           | KB4245          | F      |                                         | The Center for Reproduction of Endangered Species, San-Diego, CA, US                                     | Oliver Ryder                                                                        |                                            |
| CCL-1     | Cacajao        | calvus         |              | red uakari                                      | 743             | M      | wild caught                             | Köln Zoo, Germany                                                                                        | U. Ruempler                                                                         | Osterholz et al. 2009 MPE                  |
| CCO-1     | Callicebus     | coimbrai       |              | titi monkeys                                    | 18              | F      | wild caught                             | Bahia state, Brazil; Instituto nacional de Cancer - Genetics Division                                    | Centro de Primatologia do Estado do Rio de Janeiro                                  |                                            |
| CCP-3     | Cebus          | capucinus      |              | white-faced capuchin                            | Shelby          | M      |                                         | Catoctin Wildlife Park and Zoo, Thumont, MD, US                                                          | June Bellizzi, Melody Roelke                                                        |                                            |
| CCU-2     | Callicebus     | cupreus        |              | red titi, copper titi                           | CCUP1           | M      | captive born                            | La Vallee des Signes, France                                                                             | J. Vermeer                                                                          | Osterholz et al. 2009 MPE                  |
| CCY-1     | Cercocebus     | chrysogaster   |              | golden-bellied mangabey                         | 214             | F      | parents wild caught                     | Wuppertal Zoo, Germany                                                                                   | G. Olbricht                                                                         | no                                         |
| CDA-3     | Cercopithecus  | diana          |              | Diana monkey                                    | 1001            | M      | captive born                            | Gettorf Zoo, Germany                                                                                     | U. Traxel                                                                           | no                                         |
| CDO-1     | Callicebus     | donacophilus   |              | white-eared titi, Bolivian titi                 | KB6580          | M      |                                         | The Center for Reproduction of Endangered Species, San-Diego, CA, US                                     | Oliver Ryder                                                                        |                                            |
| CEA-1     | Cebus          | albifrons      |              | white-fronted capuchin                          | 36              | M      | wild caught                             | Barcelos, Amazonas State, Brazil; Instituto nacional de Cancer - Genetics Division                       | Instituto Nacional de Cancer, Genetics Division                                     |                                            |

Table S1. List of DNA specimens used in study

|        |                |                  |              |                                  |                          |   |                                   |                                                                                         |                                                    |                                            |
|--------|----------------|------------------|--------------|----------------------------------|--------------------------|---|-----------------------------------|-----------------------------------------------------------------------------------------|----------------------------------------------------|--------------------------------------------|
| CGE-4  | Callithrix     | geoffroyi        |              | Geoffroy's marmoset              | 325                      | F | captive born                      | Dresden Zoo, Germany                                                                    | H. Will                                            | no                                         |
| CGO-1  | Callimico      | geoldii          |              | Geoldi's monkey                  |                          | M | birth: unknown; currently captive | National Zoological Park, DC, US                                                        | Dr. Mitchell Bush                                  |                                            |
| CGU-7  | Colobus        | guereza          |              | pied black colobus               | 333                      | M | captive born                      | Köln Zoo, Germany                                                                       | U. Ruempler                                        | Osterholz et al. 2008 BMC Evol Biol        |
| CHH-1  | Cercopithecus  | hamlyni          | hamlyni      | Hamlyn's Guenon                  | KB10153                  | M |                                   | The Center for Reproduction of Endangered Species, San-Diego, CA, US                    | Oliver Ryder                                       |                                            |
| CIH-1  | Cercopithecus  | lhoesti          |              | L'Hoest's monkey                 | PR00283                  | M |                                   | Coriell Cell Repositories, NJ, US                                                       | Coriell Cell Repositories, NJ, US                  |                                            |
| CIS-1  | Chirotopes     | israelita        |              | brown-backed bearded saki        | 46                       | M | wild caught                       | Barcelos, Amazonas State, Brazil; Instituto nacional de Cancer - Genetics Division      | Instituto Nacional de Cancer, Genetics Division    |                                            |
| CIA-1  | Callithrix     | jacchus          |              | common marmoset                  |                          | M | wild                              |                                                                                         | H. Seunaz                                          |                                            |
| CKU-1  | Callithrix     | kuhlii           |              | Weid's black-tufted-ear marmoset | 31                       | M | captive                           | Instituto nacional de Cancer - Genetics Division                                        | Centro de Primatologia do Estado do Rio de Janeiro |                                            |
| CLP-1  | Callicebus     | personatus       |              | masked titi                      | 25                       | F | wild caught                       | Espirito Santo State, Brazil; Instituto nacional de Cancer - Genetics Division          | Centro de Primatologia do Estado do Rio de Janeiro |                                            |
| CMD-1  | Cheirogaleus   | medius           |              | dwarf fat-tailed lemur           | Dwarf Fat-tail lemur     | F | captive born                      | Catoctin Wildlife Park and Zoo, Thumont, MD, US                                         | June Bellizzi, Melody Roelke                       |                                            |
| CMH-1  | Callicebus     | moloch           |              | dusky titi monkey                | 21                       | F | captive                           | Instituto nacional de Cancer - Genetics Division                                        | Centro Nacional de Primatas                        |                                            |
| CMJ-3  | Microcebus     | minuscule        | subspecies 1 | small iron-gray dwarf lemur      | T019                     | U | captive born                      | Frankfurt Zoo, Germany                                                                  | B. Geyer                                           | Roos, unpublished                          |
| CMO-2  | Cercopithecus  | mona             |              | Mona monkey                      | 256                      | M | captive born                      | Lisbon Zoo, Portugal                                                                    | E. Bairoa Ruivo                                    | Roos, unpublished                          |
| CMT-1  | Cercopithecus  | mitis            |              | blue monkey                      | 017                      | F | captive born                      | Amsterdam Zoo, Netherlands                                                              | D. Dekker                                          | no                                         |
| CNE-1  | Cercopithecus  | neglectus        |              | De Brazza's Monkey               | 217                      | M | captive born                      | Leipzig Zoo, Germany                                                                    | K. Eulenberger                                     | no                                         |
| CNI-1  | Callicebus     | nigrifrons       |              | southern masked titi             | 23                       | M | wild caught                       | Carangola, Minas Gerais State, Brazil; Instituto nacional de Cancer - Genetics Division | Centro de Primatologia do Estado do Rio de Janeiro |                                            |
| COV-1  | Cebus          | olivaceus        |              | weeper capuchin                  | 110                      | F | captive born                      | Dortmund Zoo, Germany                                                                   | C. Osmani                                          | no                                         |
| CPE-10 | Callithrix     | penicillata      |              | black ear-tufted colobus         |                          | M |                                   | Bahia, Brazil                                                                           | Itapu, Brazil, Foz de Iguazu                       |                                            |
| CPO-2  | Colobus        | polykomos        |              | black colobus                    | 371                      | U | wild caught                       | Erfurt Zoo, Germany                                                                     | M. Melcher                                         | Roos, unpublished                          |
| CPP-1  | Cercopithecus  | petaurista       | petaurista   | lesser white-nosed monkey        | PR00762                  | M |                                   | Coriell Cell Repositories, NJ, US                                                       | Oliver Ryder                                       |                                            |
| CPY-5  | Cebuella       | pygmaea          |              | pygmy marmoset                   | 274                      | M | captive born                      | Köln Zoo, Germany                                                                       | U. Ruempler                                        | Osterholz et al. 2009 MPE                  |
| CRO-1  | Cebus          | robustus         |              | capuchin                         | 41                       | F | captive                           | Instituto nacional de Cancer - Genetics Division                                        | Centro de Primatologia do Estado do Rio de Janeiro |                                            |
| CSA-2  | Chirotopes     | satanas          | chirotopes   | bearded saki, capuchin monkey    | ADA                      | F | unknown                           | Rio de Janeiro Zoo                                                                      |                                                    |                                            |
| CSB-1  | Chlorocebus    | sabaeus          |              | green monkey                     | Isaac                    | M |                                   | Catoctin Wildlife Park and Zoo, Thumont, MD, US                                         | June Bellizzi, Melody Roelke                       |                                            |
| CTR-1  | Cercocebus     | torquatus        |              | red-capped mangabey              | OR538                    | M |                                   | The Center for Reproduction of Endangered Species, San-Diego, CA, US                    | Oliver Ryder                                       |                                            |
| CVA-5  | Galeopterus    | variegatus       |              | colugo                           | G                        | M | wild born                         | Singapore Zoological Gardens                                                            | Paolo Martelli                                     |                                            |
| CVO-1  | Cynocephalus   | volans           |              | Philippine colugo                | 1442 L                   | U |                                   | Philippines                                                                             | Lawrence Heaney, Eduardo Eizirik                   |                                            |
| CWW-1  | Cercopithecus  | wolfi            | wolfi        | Wolf's guenon                    | PR00486                  | F |                                   | Coriell Cell Repositories, NJ, US                                                       | Coriell Cell Repositories, NJ, US                  |                                            |
| CXA-1  | Cebus          | xanthosternus    |              | golden-bellied capuchin          | 1002                     | F | captive born                      | La Vallee des Signes, France                                                            | J. Vermeer                                         | Roos, unpublished                          |
| DMD-5  | Daubentonia    | madagascariensis |              | aye-aye                          | DLC ID-6202; Poe         | M | wild caught animal                | Duke Lemur Center                                                                       | Julie Horvath, Duke Lemur Center                   | no                                         |
| ECR-2  | Eulemur        | coronatus        |              | crowned lemur                    | DLC ID-6478              | M | captive                           | Duke Lemur Center                                                                       | Julie Horvath, Duke Lemur Center                   | Horvath et al 2008                         |
| EFL-15 | Eulemur        | collaris         |              | collared brown lemur             | DLC ID-5776              | F | captive                           | Duke Lemur Center                                                                       | Julie Horvath, Duke Lemur Center                   | Horvath et al 2008                         |
| EFL-16 | Eulemur        | sanfordi         |              | Sanford's brown lemur            | DLC ID-6386              | F | captive                           | Duke Lemur Center                                                                       | Julie Horvath, Duke Lemur Center                   | Horvath et al 2008                         |
| EFL-4  | Eulemur        | fulvus           |              | brown lemur                      | DLC ID-6123              | F | captive                           | Duke Lemur Center                                                                       | Julie Horvath, Duke Lemur Center                   | Horvath et al 2008                         |
| EFL-7  | Eulemur        | albifrons        |              | white-fronted brown lemur        | DLC ID-5547              | F | captive                           | Duke Lemur Center                                                                       | Julie Horvath, Duke Lemur Center                   | Horvath et al 2008                         |
| EMC-1  | Eulemur        | macaco           |              | black lemur                      | 277                      | M | captive born                      | Köln Zoo, Germany                                                                       | U. Ruempler                                        | Roos, unpublished                          |
| EMC-5  | Eulemur        | macaco           | flavifrons   | blue eyed black lemur            | DLC ID-6288              | M | captive                           | Duke Lemur Center                                                                       | Julie Horvath, Duke Lemur Center                   | Horvath et al 2008                         |
| EMO-1  | Eulemur        | mongoz           |              | mongoose lemur                   | 358                      | M | wild caught                       | Köln Zoo, Germany                                                                       | U. Ruempler                                        | Roos, unpublished                          |
| EPA-9  | Erythrocebus   | patas            |              | patas monkey                     | 928                      | M | captive born                      | La Vallee des Signes, France                                                            | J. Vermeer                                         | no                                         |
| ERB-4  | Eulemur        | rubriventer      |              | red-bellied lemur                | DLC ID-6038              | F | wildcaught                        | Duke Lemur Center                                                                       | Julie Horvath, Duke Lemur Center                   | Horvath et al 2008                         |
| ERF-1  | Eulemur        | rufus            |              | red-fronted lemur                | 356                      | M | captive born                      | Köln Zoo, Germany                                                                       | U. Ruempler                                        | Roos, unpublished                          |
| GGO-9  | Gorilla        | gorilla          |              | Western lowland gorilla          | 107809; Gus              | M | captive born                      | captive born at Bronx Zoo, US; National Zoological Park, DC, US                         | Dr. Mitchell Bush                                  |                                            |
| GGR-2  | Otolemur       | garnettii        |              | bushbaby                         | KIM                      | F | birth: unknown; currently captive | Biosphere 2 Oracle, AZ, US                                                              | Stephen O'Brien                                    |                                            |
| GMO-4  | Galago         | moholi           |              | lesser bushbaby                  | DLC ID-3185; Farkleberry | M | captive                           | Duke Lemur Center                                                                       | Julie Horvath, Duke Lemur Center                   | GMO-3185                                   |
| GSE-1  | Galago         | senegalensis     |              | Senegal galago                   | KB14283                  | F |                                   | The Center for Reproduction of Endangered Species, San-Diego, CA, US                    | Leona Chemnick                                     |                                            |
| GTH-1  | Galago         | thomasi          |              | Thomas's bushbaby                | Gthomasi                 | U | wild                              | Democratic Republic of Congo                                                            | K. Ammann                                          | Roos, unpublished                          |
| HAG-6  | Hylobates      | agilis           |              | dark-handed gibbon               | 1138                     | M | captive born                      | Plock Zoo, Poland                                                                       | W. Zduniak                                         | Roos, unpublished                          |
| HCO-3  | Nomascus       | leucogenys       |              | white-cheeked gibbon             | 1009                     | M | captive born                      | Duisburg Zoo, Germany                                                                   | M. G. Hartmann                                     | Roos, unpublished                          |
| HGR-1  | Hapalemur      | griseus          |              | gray bamboo lemur                | HGG44                    | M | wild                              | Madagascar                                                                              | Y. Rumpler                                         | Rumpler, unpublished                       |
| HLA-1  | Hylobates      | lar              |              | lar gibbon                       | 0005FC59B7               | M |                                   | Taipei Zoo                                                                              | Ci Wen                                             |                                            |
| HMU-6  | Hylobates      | muelleri         |              | Mueller's bornean gray gibbon    | 1058                     | M | wild caught                       | Rostock Zoo, Germany                                                                    | K. Linke                                           | Roos, unpublished                          |
| HOC-1  | Hapalemur      | occidentalis     |              | bamboo lemur                     | 288                      | M | wild caught                       | University Strasbourg, France                                                           | Y. Rumpler                                         | Rumpler, unpublished                       |
| HSA-34 | Homo           | sapiens          |              | human                            |                          | M |                                   |                                                                                         | Sergey Kolmogorov                                  |                                            |
| LAA-1  | Lophocebus     | albigena         |              | gray-cheeked mangabey            | PR00609                  | M |                                   | Coriell Cell Repositories, NJ, US                                                       | Coriell Cell Repositories, NJ, US                  |                                            |
| LAC-2  | Lagothrix      | cana             |              | gray woolly monkey               | 455                      | M | captive born                      | Basel Zoo, Switzerland                                                                  | O. Pagan                                           | no                                         |
| LAN-1  | Lepilemur      | ankaranensis     |              | Ankarana sportive lemur          | L86                      | M | wild                              | Ankarana, Madagascar                                                                    | Y. Rumpler                                         | Andriaholinirina et al. 2006 BMC Evol Biol |
| LAT-2  | Lophocebus     | aterrimus        |              | black mangabey                   | 970                      | M | captive born                      | Gettorf Zoo, Germany                                                                    | U. Traxel                                          | no                                         |
| LCH-1  | Leontopithecus | chrysomelas      |              | golden-headed lion tamarin       | 355                      | M | captive born                      | Köln Zoo, Germany                                                                       | U. Ruempler                                        | no                                         |
| LCT-10 | Lemur          | catta            |              | ring-tailed lemur                | LECA                     | M | captive born                      | München Zoo, Germany                                                                    | I. Maltzan                                         | Roos et al. 2004 PNAS                      |

Table S1. List of DNA specimens used in study

|         |                |                 |              |                                     |                             |   |                                   |                                                                      |                                                                                  |                                             |  |
|---------|----------------|-----------------|--------------|-------------------------------------|-----------------------------|---|-----------------------------------|----------------------------------------------------------------------|----------------------------------------------------------------------------------|---------------------------------------------|--|
| LDO-1   | Lepilemur      | dorsalis        |              | black-striped sportive lemur        | L244                        | M | wild                              | Ambanja, Madagascar                                                  | Y. Rumpler                                                                       | Andriaholinirina et al. 2006 BMC Evol Biol  |  |
| LER-1   | Lepilemur      | ruficaudatus    |              | red-tailed sportive lemur           | LRU                         | U | unknown                           |                                                                      | Julie Horvath, Duke Lemur Center                                                 |                                             |  |
| LJA-1   | Lepilemur      | jamesi          |              | James' sportive lemur               | L300                        | M | wild                              | Manombo, Madagascar                                                  | Y. Rumpler                                                                       | Andriaholinirina et al. 2006 Primate Report |  |
| LLG-1   | Lagothrix      | lagothrix       |              | common woolly monkey                | PR00525                     | F |                                   | Coriell Cell Repositories, NJ, US                                    | Coriell Cell Repositories, NJ, US                                                |                                             |  |
| LRO-244 | Leontopithecus | rosalia         | chrysomelas  | golden headed lion tamarin          | 894                         | M | birth: unknown; currently captive | Los Angeles ZOO, CA, US                                              | Kathie Wetmore, vet. asst., LA Zoo                                               |                                             |  |
| LSP-1   | Lepilemur      | septentrionalis |              | Northern sportive lemur             | L211                        | M | wild                              | Sahafary, Madagascar                                                 | Y. Rumpler                                                                       | Andriaholinirina et al. 2006 BMC Evol Biol  |  |
| LTA-2   | Loris          | tardigradus     |              | slender loris                       | 603                         | U | captive born                      | University Bochum, Germany                                           | H. Schulze                                                                       | Roos, unpublished                           |  |
| MAC-1   | Macaca         | arctoides       |              | stump-tailed macaque                | 692                         | F | captive born                      | Straubing Zoo, Germany                                               | W. Peter                                                                         | no                                          |  |
| MCA-1   | Macaca         | maura           |              | Moor macaque                        | 381                         | M | captive born                      | Hannover Zoo, Germany                                                | A. Knieriem                                                                      | no                                          |  |
| MCE-1   | Mirza          | zaza            |              | Coquerel's Mouse Lemur              | KB14285                     | F |                                   | The Center for Reproduction of Endangered Species, San-Diego, CA, US | Leona Chemnick                                                                   |                                             |  |
| MCY-3   | Macaca         | cydonis         |              | Taiwanese macaque                   | 880805                      | M | wild born; currently captive      | Nan To, Taiwan; Taipei Zoo, Taipei, TAIWAN                           | Warren Johnson                                                                   |                                             |  |
| MFA-18  | Macaca         | fascicularis    |              | crab-eating/long-tailed macaque     | 182                         | F | captive born                      | German Primate Center, Germany                                       | A. Schrod                                                                        | no                                          |  |
| MFS-2   | Macaca         | fuscata         |              | Japanese macaque                    | Julie                       | F | captive born                      | Catoctin Wildlife Park and Zoo, Thumont, MD, US                      | June Bellizzi, Melody Roelke                                                     |                                             |  |
| MHU-1   | Mico           | humeralifer     |              | black and white tassel-ear marmoset | 55                          | M | captive                           | Instituto national de Cancer - Genetics Division                     | Centro Nacional de Primatas                                                      |                                             |  |
| MLE-2   | Mandrillus     | leucophaeus     |              | drill                               | 323                         | M | captive born                      | Wuppertal Zoo, Germany                                               | G. Olbricht                                                                      | no                                          |  |
| MMA-14  | Macaca         | mulatta         |              | rhesus macaque                      | 046                         | M | captive born                      | Leipzig Zoo, Germany                                                 | K. Eulenberger                                                                   | no                                          |  |
| MMR-2   | Microcebus     | murinus         | subspecies 2 | grey mouse lemur                    | DLC ID-7016; Musk Rose      | M | wild-caught                       | Duke Lemur Center                                                    | Julie Horvath, Duke Lemur Center                                                 |                                             |  |
| MNE-5   | Macaca         | nemestrina      |              | pig-tailed macaque                  | 216                         | M | captive born                      | Ludwig-Maximilian-University, Germany                                | M. Laska                                                                         | no                                          |  |
| MNG-3   | Macaca         | nigra           |              | Celebes macaque                     | 857                         | M | captive born                      | Gettorf Zoo, Germany                                                 | U. Traxel                                                                        | no                                          |  |
| MOC-1   | Macaca         | ochreata        |              | booted macaque                      |                             | M | captive born                      | Catoctin Wildlife Park and Zoo, Thumont, MD, US                      | June Bellizzi, Melody Roelke, Patrick Mahlon                                     |                                             |  |
| MOG-1   | Miopithecus    | ogouensis       |              | Gabon talapoin                      | KB5742                      | F |                                   | The Center for Reproduction of Endangered Species, San-Diego, CA, US | Oliver Ryder                                                                     |                                             |  |
| MSE-1   | Macaca         | siberu          |              | Siberut macaque                     | MSIB                        | U | wild caught                       | National Museums Scotland, Great Britain                             | A. Kitchener                                                                     | Roos, unpublished                           |  |
| MSI-7   | Macaca         | silenus         |              | lion-tailed macaque                 | 866                         | M | captive born                      | German Primate Center, Germany                                       | A. Schrod                                                                        | no                                          |  |
| MSP-12  | Mandrillus     | sphinx          |              | baboon, mandrill                    | 009                         | M | captive born                      | Rostock Zoo, Germany                                                 | K. Linke                                                                         | no                                          |  |
| MSY-3   | Macaca         | sylvanus        |              | barbaru macaque                     | 722                         | M | captive born                      | La Vallée des Signes, France                                         | J. Vermeer                                                                       | no                                          |  |
| MTH-3   | Macaca         | thibetana       |              | Tibetan macaque                     | KB5930                      | F |                                   | The Center for Reproduction of Endangered Species, San-Diego, CA, US | Leona Chemnick                                                                   |                                             |  |
| MTO-6   | Macaca         | tonkeana        |              | tonkean macaque                     | Brutus                      | M | captive born                      | Catoctin Wildlife Park and Zoo, Thumont, MD, US                      | June Bellizzi, Melody Roelke                                                     |                                             |  |
| NBE-1   | Nycticebus     | bengalensis     |              | Bengal slow loris                   | 870                         | M | wild caught                       | Berlin Zoo, Germany                                                  | R. Göltenboth                                                                    | Roos, unpublished                           |  |
| NCN-2   | Nomascus       | concolor        |              | black gibbon                        | 560                         | M | wild                              | Che Tao, Vietnam                                                     | T. Nadler                                                                        | Roos, unpublished                           |  |
| NCO-2   | Nycticebus     | cougang         |              | slow loris                          | 560                         | M | wild                              | Che Tao, Vietnam                                                     | T. Nadler                                                                        | Roos, unpublished                           |  |
| NGA-2   | Nomascus       | gabrielae       |              | red-cheeked gibbon                  | P109                        | M | wild caught                       | Endangered Primate Rescue Center, Vietnam                            | T. Nadler                                                                        | Roos, unpublished                           |  |
| NLA-2   | Nasalis        | larvatus        |              | proboscis monkey                    | Nlarvatus                   | M | captive born                      | Wilhelma Stuttgart, Germany                                          | W. Rietschel                                                                     | Osterholz et al. 2008 BMC Evol Biol         |  |
| NPY-1   | Nycticebus     | pygmaeus        |              | pygmy slow loris                    | 12-016                      | M | wild caught, confiscated          | Endangered Primate Rescue Center, Vietnam                            | T. Nadler                                                                        | Roos, unpublished                           |  |
| NSI-1   | Nomascus       | siki            |              | Southern white-cheeked gibbon       | 9-03                        | M | wild caught, confiscated          | Endangered Primate Rescue Center, Vietnam                            | T. Nadler                                                                        | Roos, unpublished                           |  |
| OCR-1   | Otolemur       | crassicaudatus  |              | greater galago                      | GACR                        | U | captive born                      | University Tübingen, Germany                                         | H. Tichy                                                                         | Roos, unpublished                           |  |
| PAN-10  | Papio          | anubis          |              | East African baboon                 | 13301                       | M | captive born                      | German Primate Center, Germany                                       | A. Schrod                                                                        | Roos, unpublished                           |  |
| PBD-1   | Ptilocolobus   | badius          |              | Western red colobus                 | PB1                         | M | wild                              | Tai National Park, Ivory Coast                                       | F. H. Leendertz                                                                  | Roos, unpublished                           |  |
| PCM-1   | Presbytis      | comata          |              | Javan surili                        | 551                         | F | wild caught                       | Howletts Wild Animal Park, Great Britain                             | E. Thetford                                                                      | Roos, unpublished                           |  |
| PCN-2   | Pygathrix      | cinerea         |              | grey-shanked douc langur            | 343                         | M | wild caught, confiscated          | Endangered Primate Rescue Center, Vietnam                            | T. Nadler                                                                        | Roos, unpublished                           |  |
| PDI-2   | Propithecus    | diadema         |              | diademmed sifaka                    | Pdd18                       | M | wild                              | Zahamena, Madagascar                                                 | Y. Rumpler                                                                       | Rumpler, unpublished                        |  |
| PEP-1   | Propithecus    | edwardsi        |              | Milne-Edwards's sifaka              | Pde6                        | U | wild                              | Ambodisovoka, Madagascar                                             | Y. Rumpler                                                                       | Rumpler, unpublished                        |  |
| PEP-2   | Perodicticus   | potto           |              | potto                               | 610                         | M | captive born                      | University Bochum, Germany                                           | H. Schulze                                                                       | Roos, unpublished                           |  |
| PHM-1   | Papio          | hamadryas       |              | Hamadryas baboon                    | KB10869                     | M |                                   | The Center for Reproduction of Endangered Species, San-Diego, CA, US | Oliver Ryder                                                                     |                                             |  |
| PIR-1   | Pithecia       | irrorata        |              | gray monk saki                      | 57                          | M | captive                           | Instituto national de Cancer - Genetics Division                     | Centro Nacional de Primatas                                                      |                                             |  |
| PME-2   | Presbytis      | melalophos      |              | Sumatran surili                     | 714                         | M | wild caught                       | Howletts Wild Animal Park, Great Britain                             | E. Thetford                                                                      | Roos, unpublished                           |  |
| PNE-2   | Pygathrix      | nemaeus         |              | red-shanked douc langur             | 266                         | M | captive born                      | Köln Zoo, Germany                                                    | U. Ruempler                                                                      | Roos, unpublished                           |  |
| PNI-1   | Pygathrix      | nigripes        |              | black-shanked douc                  | 344                         | F | wild caught, confiscated          | Endangered Primate Rescue Center, Vietnam                            | T. Nadler                                                                        | Roos, unpublished                           |  |
| PPN-8   | Pan            | paniscus        |              | bonobo; pygmy chimpanzee            | 4229782                     | M | birth: unknown; currently captive | San Diego Zoo, CA                                                    | Dan Janssen, DVM                                                                 |                                             |  |
| PPP-2   | Papio          | papio           |              | Guinea baboon                       | 238                         | M | captive born                      | Nürnberg Zoo, Germany                                                | A. Gaucler                                                                       | no                                          |  |
| PPT-1   | Pithecia       | pithecia        |              | white-faced or Guianan saki         | PR00239                     | M |                                   | Coriell Cell Repositories, NJ, US                                    | Coriell Cell Repositories, NJ, US                                                |                                             |  |
| PPY-155 | Pongo          | abelli          |              | orang utan                          | 519                         | M | wild caught                       | Nürnberg Zoo, Germany                                                | A. Gaucler                                                                       | Roos, unpublished                           |  |
| PPY-157 | Pongo          | pygmaeus        |              | orang utan                          | 536                         | F | captive born                      | Duisburg Zoo, Germany                                                | M. G. Hartmann                                                                   | Roos, unpublished                           |  |
| PTA-1   | Propithecus    | tattersalli     |              | golden-crowned sifaka               | 762                         | U | wild                              | Daraina, Madagascar                                                  | Y. Rumpler                                                                       | Rumpler, unpublished                        |  |
| PTR-104 | Pan            | troglydites     | verus        | common chimpanzee                   | 1014                        | M | captive born                      | Danzig Zoo, Poland                                                   | I. Krause                                                                        | Roos, unpublished                           |  |
| PTR-60  | Pan            | troglydites     | troglydites  | Central African chimpanzee          | Masuku                      | F | wild born; currently captive      | Gabon                                                                | Wolff Enard, Max Planck Institute for Evolutionary Anthropology Leipzig, Germany |                                             |  |
| PVC-2   | Propithecus    | verreauxi       | coquereli    | Coquerel's sifaka                   | DLC ID-6827 Marcus Aurelius | M | captive                           |                                                                      | Julie Horvath, Duke Lemur Center                                                 |                                             |  |
| PVE-1   | Propithecus    | verreauxi       |              | Verreaux's sifaka                   | 495                         | M | captive born                      | Parc Zoologique de Paris, France                                     | C.-A. Gauthier                                                                   | Roos, unpublished                           |  |
| RBR-1   | Rhinopithecus  | brelichi        |              | gray snub-nosed monkey              | G002                        | M | wild caught                       | Fanjingshan Breeding Station, China                                  | M. Yang                                                                          | Roos, unpublished                           |  |

Table S1. List of DNA specimens used in study

|       |                |             |             |                                              |             |   |                                   |                                                                      |                                                                                      |                                     |  |
|-------|----------------|-------------|-------------|----------------------------------------------|-------------|---|-----------------------------------|----------------------------------------------------------------------|--------------------------------------------------------------------------------------|-------------------------------------|--|
| SAU-1 | Saimiri        | ustus       |             | bare-eared squirrel monkey                   | 2307        |   | wild caught                       | Jamari River, Rondônia State, Brazil;                                | Universidade Federal do Pará - Laboratório de Biologia Molecular, Campus de Braganca |                                     |  |
| SBI-1 | Saguinus       | bicolor     |             | Pied tamarin                                 | S225        | M | captive born                      | Magdeburg Zoo, Germany                                               | P. Grothmann                                                                         | no                                  |  |
| SBO-3 | Saimiri        | boliviensis | boliviensis | Bolivian squirrel monkey                     | 711         | M | captive born                      | La Vallee des Signes, France                                         | J. Vermeer                                                                           | Roos, unpublished                   |  |
| SEE-1 | Semnopithecus  | entellus    | entellus    | hanuman langur                               | PR00739     | M |                                   | Coriell Cell Repositories, NJ, US                                    | Coriell Cell Repositories, NJ, US                                                    |                                     |  |
| SEF-2 | Semnopithecus  | entellus    |             | hanuman langur                               | 499         | M | captive born                      | Berlin Zoo, Germany                                                  | R. Göltenboth                                                                        | Osterholz et al. 2008 BMC Evol Biol |  |
| SFU-6 | Saguinus       | fuscicollis |             | saddle-back tamarin                          | S66         | M | captive born                      | Magdeburg Zoo, Germany                                               | P. Grothmann                                                                         | no                                  |  |
| SGE-3 | Saguinus       | geoffroyi   |             | Geoffroy's tamarin                           |             | F |                                   | Catoctin Wildlife Park and Zoo, Thumont, MD, US                      | June Bellizzi, Melody Roelke                                                         |                                     |  |
| SHE-1 | Semnopithecus  | hector      |             | Tarai gray langur                            | SHEC1       | U | wild                              | Ramnagar, Nepal                                                      | T. Ziegler                                                                           | Osterholz et al. 2008 BMC Evol Biol |  |
| SIM-2 | Saguinus       | imperator   |             | emperor tamarin                              | 60          | M | captive                           | Instituto nacional de Cancer - Genetics Division                     | Centro Nacional de Primatas                                                          |                                     |  |
| SLA-1 | Saguinus       | labiatus    |             | red-chested mustached tamarin                | KB3307      | F |                                   | The Center for Reproduction of Endangered Species, San-Diego, CA, US | Leona Chemnick                                                                       |                                     |  |
| SMD-1 | Saguinus       | midas       |             | midas tamarin                                | S222        | M | captive born                      | Magdeburg Zoo, Germany                                               | P. Grothmann                                                                         | no                                  |  |
| SMY-3 | Saguinus       | mystax      |             | moustached tamarin                           |             | M |                                   | Catoctin Wildlife Park and Zoo, Thumont, MD, US                      | June Bellizzi, Melody Roelke                                                         |                                     |  |
| SOE-3 | Saguinus       | oedipus     |             | cotton-top tamarin                           | 1203        | M | captive born                      | German Primate Center, Germany                                       | A. Schrod                                                                            | no                                  |  |
| SOO-1 | Saimiri        | oerstedii   | oerstedii   | red-backed squirrel monkey                   | PR00741     | M |                                   | Coriell Cell Repositories, NJ, US                                    | Coriell Cell Repositories, NJ, US                                                    |                                     |  |
| SSC-7 | Saimiri        | sciureus    |             | South American squirrel monkey               | 210         | M | captive born                      | Schwerin Zoo, Germany                                                | U. Ricker                                                                            | no                                  |  |
| SSI-1 | Saguinus       | martinsi    |             | Martins's tamarin                            | 61          | M | born to wild caught               | Instituto nacional de Cancer - Genetics Division                     | Centro de Primatologia do Estado do Rio de Janeiro                                   |                                     |  |
| SSY-2 | Symphalangus   | syndactylus |             | siamang                                      | 100331      | M |                                   | National Zoological Park, DC, US                                     | Dr. Mitchell Bush                                                                    |                                     |  |
| TAU-1 | Trachypithecus | auratus     |             | Javan langur                                 | 1000        | M | captive born                      | Wilhelma Stuttgart, Germany                                          | W. Rietschel                                                                         | Roos et al. 2008 MPE                |  |
| TBA-1 | Tarsius        | bancanus    |             | Western tarsier                              | 107434      | U |                                   | National Zoological Park, DC, US                                     | Eduardo Eizirik; Dr. Richard Montali Pathology Dept.                                 |                                     |  |
| TDE-1 | Trachypithecus | delacouri   |             | Delacour's Langur                            | 169         | M | wild caught, confiscated          | Endangered Primate Rescue Center, Vietnam                            | T. Nadler                                                                            | Roos et al. 2007 VIP                |  |
| TFR-1 | Trachypithecus | francoisi   |             | Francois's leaf monkey or Indochinese langur | PR01099     | M |                                   | Coriell Cell Repositories, NJ, US                                    | Coriell Cell Repositories, NJ, US                                                    |                                     |  |
| TGE-2 | Theropithecus  | gelada      |             | gelada baboon                                | 936         | M | captive born                      | La Vallee des Signes, France                                         | J. Vermeer                                                                           | no                                  |  |
| TGL-4 | Tupaia         | glis        |             | tree shrew                                   |             | M | wild born; currently captive      | Malaysia, Singapore Zoological Gardens                               | Warren Johnson; Paolo Martelli                                                       |                                     |  |
| THA-1 | Trachypithecus | hatinhensis |             | Hatinh langur                                | 171         | M | wild caught, confiscated          | Endangered Primate Rescue Center, Vietnam                            | T. Nadler                                                                            | Roos et al. 2007 VIP                |  |
| TMI-1 | Tupaia         | minor       |             | lesser tree shrew                            | KB8637-3082 | M | birth: unknown; currently captive | The Center for Reproduction of Endangered Species, San-Diego, CA, US | Oliver Ryder                                                                         |                                     |  |
| TOB-4 | Trachypithecus | obscurus    |             | dusky leaf monkey                            | 215         | M | captive born                      | Wuppertal Zoo, Germany                                               | G. Olbricht                                                                          | Osterholz et al. 2008 BMC Evol Biol |  |
| TPH-1 | Trachypithecus | phayrei     |             | Phayre's leaf monkey                         | 178         | F | wild caught, confiscated          | Endangered Primate Rescue Center, Vietnam                            | T. Nadler                                                                            | Roos et al. 2007 VIP                |  |
| TSY-2 | Tarsius        | syrichta    |             | Philippine tarsier                           | 1017        | U | wild caught                       | University Münster, Germany                                          | J. Schmitz                                                                           |                                     |  |
| TVV-2 | Trachypithecus | vetulus     | monticola   | Southwest purple-faced langur                | 435         | M | wild caught                       | Belfast Zoo, Great Britain                                           | M. Chalais                                                                           | Roos, unpublished                   |  |
| VVA-2 | Varecia        | variegata   | variegata   | ruffed lemur                                 | DLC ID-4598 | M | wild caught                       |                                                                      | Julie Horvath, Duke Lemur Center                                                     | Horvath et al 2008                  |  |
| VVA-7 | Varecia        | variegata   | rubra       | ruffed lemur                                 | DLC ID-6633 | F | captive                           |                                                                      | Julie Horvath, Duke Lemur Center                                                     | Horvath et al 2008                  |  |
