# Supplementary material
Source: PubMed Central journal article supplement (PMC3060065)
Supplement: pgen.1001342.s015.pdf [file pgen.1001342.s015.pdf]

Table S2. List of 54 gene regions, primers and source used in study.

|    | NCBI official symbol | Gene name alias used in this study | NCBI Official Full Name                                                                           | NCBI GeneID | Product size (estimated) | Forward primer sequence    | Reverse primer sequence    | Reference                                   |
|----|----------------------|------------------------------------|---------------------------------------------------------------------------------------------------|-------------|--------------------------|----------------------------|----------------------------|---------------------------------------------|
| 1  | ABCA1                | ABCA1                              | ATP-binding cassette, sub-family A (ABC1), member 1                                               | 19          | 638                      | CCTCCATCTTTTCAGCTCTACTAC   | ACAAGAGCTGGAGATTGGATAAC    | Horvath et al., 2008                        |
| 2  | ADORA3               | ADORA3                             | adenosine A3 receptor                                                                             | 140         | 324                      | ACCCCATGTTGGCTGGAA         | GATAGGGTTCATCATGGAGTT      | Murphy et al., Nature, 2001                 |
| 3  | AFF2                 | AFF2                               | AF4/FMR2 family, member 2                                                                         | 2334        | 516                      | GCAGATTTCACATGATTGTGC      | CAGTCAGGAGGCCCTAAAA        | this study                                  |
| 4  | AFF2                 | AFF2.2                             | AF4/FMR2 family, member 2                                                                         | 2334        | 591                      | CCAGAACACGGTTGGAAACT       | TGAACTGAAAGGCCACTGCT       | this study                                  |
| 5  | APP                  | APP                                | amyloid beta (A4) precursor prote                                                                 | 351         | 689                      | TCCAAGATGCAGCAGAAGC        | CTAATGTGTGCACATAAAACAGG    | Murphy et al., Nature, 2001                 |
| 6  | ATXN7                | ATXN7                              | ataxin 7                                                                                          | 6314        | 554                      | TGATCTGCCAGGACCTTTGT       | TTGGCCAGATCACTCAAATG       | this study                                  |
| 7  | AXIN1                | AXIN1                              | axin 1                                                                                            | 8312        | 995                      | CTCTGCCTTCGTGTACCGTCTAC    | GACCCACCTTCTTAATCCTGTCTC   | Horvath et al., 2008                        |
| 8  | BCH1                 | BCH1                               | butyrylcholinesterase                                                                             | 590         | 997                      | TCAGAGATCTGGAAACCCAAA      | ATGCATCACTCCATCCATT        | Janecka et al., 2007                        |
| 9  | BCOR                 | BCOR                               | BCL6 corepressor                                                                                  | 54880       | 788                      | AATCTCACTTCCGGAGAGCA       | CCTTGCTACTCAGCAGTCC        | this study                                  |
| 10 | BDNF                 | BDNF                               | brain-derived neurotrophic factor                                                                 | 627         | 570                      | CATCTTTTCTTACTATGGTT       | TTCCAGTGCCTTTTGTCTATG      | Murphy et al., Nature, 2001                 |
| 11 | BRCA2                | BRCA2                              | breast cancer 2, early onset                                                                      | 675         | 1263                     | AGCTCTTTGGGACAATCTGAGGA    | CTGTAATTTCTGCCTTTTGTCTAGG  | this study                                  |
| 12 | CFTR                 | CFTR                               | cystic fibrosis transmembrane conductance regulator (ATP-binding cassette sub-family C, member 7) | 1080        | 815                      | CTCTGTGAACACAGATAGAAGC     | TTACTCCAGGAGGCTCAAAAGCC    | Horvath et al., 2008                        |
| 13 | CHRNA1               | CHRNA1                             | cholinergic receptor, nicotinic, alpha 1 (muscle)                                                 | 1134        | 401                      | GACCATGAAGTCAGACAGGAG      | GGAGTATGTGTCCATCACCAT      | Lyons et al., 1997                          |
| 14 | CNR1                 | CNR1                               | cannabinoid receptor 1 (brain)                                                                    | 1268        | 993                      | CCAAATTAGGTTACTTCCCACA     | CATAGATGATGGGTTTCCAGC      | Murphy et al., Nature, 2001                 |
| 15 | CREM                 | CREM                               | cAMP responsive element modulator                                                                 | 1390        | 460                      | AGGAACTCAAGGCCCTCAAA       | GGGAGGACAAATGTCTTCAA       | Murphy et al., Nature, 2001                 |
| 16 | DACH1                | DACH1                              | dachshund homolog 1 (Drosophila)                                                                  | 1602        | 643                      | TAGCCAGCCACTGTGAGAGA       | TGACTGATTACTGCTCGGG        | this study                                  |
| 17 | DCTN2                | DCTN2                              | dynactin 2 (p50)                                                                                  | 10540       | 620                      | TGGCTCTGGCTGTGACTCA        | GAAAACCTGGCCACAGTTGA       | this study                                  |
| 18 | DENND5A              | RAB6IP1                            | DENN/MADD domain containing 5A                                                                    | 23258       | 751                      | CCAGAGTTATCATGGCCAATC      | TGACCAAGCAAGAAGCTGGG       | this study                                  |
| 19 | DMRT1                | DMRT1                              | doublesex and mab-3 related transcription factor 1                                                | 1761        | 563                      | ATCCCTTGTCTGAGTGCCA        | ACATTGCAAGACCCCTGAC        | this study                                  |
| 20 | ERC2                 | ERC2                               | ELKS/RAB6-interacting/CAST family member 2                                                        | 26059       | 790                      | AGTCACTCCTCTCTGGTTTAG      | CTCCTTGAGGATCTCCAGCAAC     | Horvath et al., 2008                        |
| 21 | FAM123B              | FAM123B                            | family with sequence similarity 123B                                                              | 138285      | 746                      | CATCACTCTGGAAGAGCTGC       | TGGATTGAGGATGATTCCAGG      | this study                                  |
| 22 | FBN1                 | FBN1                               | fibrillin 1                                                                                       | 2200        | 802                      | AGACTACTCTAGCTGTGAACCTGG   | AAGCACCATTACAAACCTCCA      | Janecka et al., 2007                        |
| 23 | FES                  | FES                                | feline sarcoma oncogene                                                                           | 2242        | 401                      | GGGGAACCTTTGGGGAAGTGT      | TCATGACGATGTAGATGG         | Venta et al., 1996                          |
| 24 | FOXP1                | FOXP1                              | forkhead box P1                                                                                   | 27086       | 581                      | TCAGCATCACTAATTTTGTGAAC    | TGATGCAACTCTCAAGGAAAAG     | this study                                  |
| 25 | GHR                  | GHR                                | growth hormone receptor                                                                           | 2690        | 761                      | CCAGTCCAGTCCAAAGAT         | TGATTTCTTGGTCAAGGCA        | Venta et al., 1996                          |
| 26 | KCNMA1               | KCNMA1                             | potassium large conductance calcium-activated channel, subfamily M, alpha member 1                | 3778        | 649                      | AAGTGGGAAGGCTCTCTCAA       | CTCTGCCTAATGCCAGAA         | this study                                  |
| 27 | KDM5C                | SMCX                               | lysine (K)-specific demethylase 5C                                                                | 8242        | 340                      | GGAGGAGCTGAGACAGCTAGA      | TGTACAACCCAGCTCCTTC        | this study                                  |
| 28 | KDM5D                | SMCY                               | lysine (K)-specific demethylase 5D                                                                | 8284        | 700                      | TGGAAGCCATAATTCGTGAG       | CCCAGCAGCTCTGTGTCA         | this study                                  |
| 29 | LRPPRC               | LRPPRC-169                         | leucine-rich PPR-motif containing                                                                 | 10128       | 916                      | CTGGAGACAGCTTTTGTGTTATCC   | ACCTTAGAGGCTGAAAGTGACTG    | Horvath et al., 2008                        |
| 30 | LRPPRC               | LRPPRC-171                         | leucine-rich PPR-motif containing                                                                 | 10128       | 818                      | GACACAGGAGCTTAGCAAAACAC    | GATGCCAGAGCTCTCTACAG       | Horvath et al., 2008                        |
| 31 | LUC7L                | LUC7L                              | LUC7-like (S. cerevisiae)                                                                         | 55692       | 728                      | CAGCAATTCGAGAGGACTCTTG     | GCAGATGGTACAGTATGTGTTGG    | Horvath et al., 2008                        |
| 32 | MAPKAP1              | MAPKAP1                            | mitogen-activated protein kinase associated protein 1                                             | 79109       | 670                      | TGTCAAGTCCATCGCTATAACT     | GGGCTGAATGATGTGATT         | this study                                  |
| 33 | MBD5                 | MBD5                               | methyl-CpG binding domain protein 5                                                               | 55777       | 558                      | GGCAGATAGCTACCACCACC       | CTTCCAGGCAAGGTTTCAATC      | this study                                  |
| 34 | NEGR1                | NEGR1                              | neuronal growth regulator 1                                                                       | 257194      | 560                      | CATTATGTGGTTGGCAGCAT       | TTGCAAGATGACAAACTATGTGT    | this study                                  |
| 35 | NPAS3                | NPAS3                              | neuronal PAS domain protein 3                                                                     | 64067       | 607                      | TCATAAAGCAACAGCCTGC        | TGTCAGAATCAGCTGAGACA       | this study                                  |
| 36 | NPAS3                | NPAS3.2                            | neuronal PAS domain protein 3                                                                     | 64067       | 674                      | TCAGGATTTGATCTGCTTTT       | TGGAATATCTAACCATCTCTGAACA  | this study                                  |
| 37 | PLCB4                | PLCB4                              | phospholipase C, beta 4                                                                           | 5332        | 383                      | GTGAAATGGAAAGCCGAGAT       | CACCAAGCTCATTTACTGTGA      | Murphy et al., Nature, 2001                 |
| 38 | PNO1                 | PNO1                               | prepronociceptin                                                                                  | 5368        | 343                      | GCATCCTTGAGTGTGAAGAGAA     | TGCCTATAAACTCACTGAACC      | Murphy et al., Nature, 2001                 |
| 39 | POLA1                | POLA1                              | polymerase (DNA directed), alpha 1, catalytic subunit                                             | 5422        | 644                      | TGACAGTTGACAGACAAAGCAA     | TGCCATCAGTTTGTGAAAG        | this study                                  |
| 40 | RAG1                 | RAG1                               | recombination activating gene 1                                                                   | 5896        | 1024                     | GCTTTGATGGACATGGAAGAAGACAT | GAGCCATCCCTCTCAATAATTTGAGG | Teeling et al., 2000                        |
| 41 | RAG2                 | RAG2                               | recombination activating gene 2                                                                   | 5897        | 444                      | GATTCCTGCTACTYCTCTCTCT     | CCCATGTTGCTTCCAAACCATA     | Teeling et al., 2000                        |
| 42 | RPGRI1               | RPGRI1                             | retinitis pigmentosa GTPase regulator interacting protein 1                                       | 57096       | 712                      | AGATGTTGCTATGGCACC         | ACCTGGGCTTTCTTCTGTTT       | this study                                  |
| 43 | S1PR1                | EDG1                               | sphingosine-1-phosphate receptor 1                                                                | 1901        | 978                      | GGTCCGGATTCACACTACA        | GACGTTTCCAGAGACATAATGG     | Murphy et al., Nature, 2001                 |
| 44 | SGMS1                | SGMS1                              | sphingomyelin synthase 1                                                                          | 259230      | 614                      | TCAGAATCAAAACCCATTCAG      | GTGGTGGTACAGGCCATTTTC      | this study                                  |
| 45 | SIM1                 | SIM1                               | single-minded homolog 1 (Drosophila)                                                              | 6492        | 667                      | GAGCTACCCAGAAAATTCG        | CTGGGGCTCATCATTCAATC       | this study                                  |
| 46 | SRY                  | SRY                                | sex determining region Y                                                                          | 6736        | 500                      | CAGAGTGAAGCCACCATGAACGC    | AGGTTCTTTGAGCAATGTTACCC    | Whitfield et al., 1993 (SW3), Moreira, 2002 |
| 47 | TEX2                 | TEX2                               | testis expressed 2                                                                                | 55852       | 171                      | TCCTCTTTTCTCGGCCAGT        | AAGGCTCAGACTGATAAGGAGA     | Janecka et al., 2007                        |
| 48 | TTR                  | TTR                                | transthyretin                                                                                     | 7276        | 935                      | TGCTCTGGCTGGACTGTGATT      | GACAGCATCAGAACCTTGACCAT    | Flynn and Nedbal, 1998                      |
| 49 | TYR                  | TYR                                | tyrosinase (oculocutaneous albinism IA)                                                           | 7299        | 469                      | TGTGGCCAGCTTTCAGGCAG       | CTTCATGGGCAAAATCAATGT      | Murphy et al., Nature, 2001                 |
| 50 | USH2A                | USH2A                              | Usher syndrome 2A (autosomal recessive, mild)                                                     | 7399        | 627                      | GTGGTCAATTGATTTGGAT        | CAGCAAGCTGTAATGGCAG        | this study                                  |
| 51 | UTY                  | UTY                                | ubiquitously transcribed tetratricopeptide repeat gene, Y-linked                                  | 7404        | 750                      | AGGGGCTTCATAAAAGTCAGAGT    | TTCTGTTGAAGTGGGGATA        | this study                                  |
| 52 | ZFX                  | ZFX                                | zinc finger protein, X-linked                                                                     | 7543        | 800                      | TGGAATGAAATCCCTCAAATA      | ATGTCCATCAGGGCCAAATA       | this study                                  |
| 53 | ZFY                  | ZFY                                | zinc finger protein, Y-linked                                                                     | 7544        | 850                      | GGAAAAAGAAATAAAATCCTCTGG   | ATGAGGAAAGTCTTGTCTGTG      | this study                                  |
| 54 | ZIC3                 | ZIC3                               | Zic family member 3 (odd-paired homolog, Drosophila)                                              | 7547        | 561                      | ACCCGCTATAGCTTCTGCAA       | ATAACAGGACTTTGGCACGG       | this study                                  |
