# Supplementary material
Source: PubMed Central journal article supplement (PMC3060065)
Supplement: pgen.1001342.s017.pdf [file pgen.1001342.s017.pdf]

Table S4. Chromosome location, phylogenetic informativity and nucleotide variation of 54 genes.

| #  | NCBI<br>official<br>symbol | Alias      | Human<br>chromosome<br># | bp total | Variable<br>sites | Variable<br>sites (%) | Parsimony<br>informative<br>sites | Parsimony<br>informative<br>sites (%) | Indels |
|----|----------------------------|------------|--------------------------|----------|-------------------|-----------------------|-----------------------------------|---------------------------------------|--------|
| 1  | ABCA1                      | ABCA1      | 9                        | 589      | 446               | 75.7                  | 364                               | 81.6                                  | 37     |
| 2  | ADORA3                     | ADORA3     | 1                        | 939      | 421               | 44.8                  | 336                               | 79.8                                  | 0      |
| 3  | AFF2                       | AFF2       | X                        | 500      | 196               | 39.2                  | 150                               | 30                                    | 9      |
| 4  | AFF2                       | AFF2.2     | X                        | 593      | 242               | 40.8                  | 188                               | 77.7                                  | 0      |
| 5  | APP                        | APP        | 21                       | 753      | 270               | 35.9                  | 167                               | 61.9                                  | 21     |
| 6  | ATXN7                      | ATXN7      | 3                        | 531      | 217               | 40.9                  | 182                               | 83.9                                  | 18     |
| 7  | AXIN1                      | AXIN1      | 16                       | 950      | 349               | 36.7                  | 300                               | 86.0                                  | 2      |
| 8  | BCHE                       | BCHE       | 3                        | 994      | 447               | 45.0                  | 363                               | 81.2                                  | 2      |
| 9  | BCOR                       | BCOR       | X                        | 788      | 314               | 39.8                  | 201                               | 64.0                                  | 0      |
| 10 | BDNF                       | BDNF       | 11                       | 613      | 127               | 20.7                  | 99                                | 78.0                                  | 1      |
| 11 | BRCA2                      | BRCA2      | 13                       | 1270     | 714               | 56.2                  | 552                               | 77.3                                  | 15     |
| 12 | CFTR                       | CFTR1      | 7                        | 933      | 547               | 58.6                  | 429                               | 78.4                                  | 47     |
| 13 | CHRNA1                     | CHRNA1     | 2                        | 397      | 310               | 78.1                  | 252                               | 81.3                                  | 27     |
| 14 | CNR1                       | CNR1       | 6                        | 998      | 270               | 27.1                  | 228                               | 84.4                                  | 1      |
| 15 | CREM                       | CREM       | 10                       | 699      | 201               | 28.8                  | 144                               | 71.6                                  | 1      |
| 16 | DACH1                      | DACH1      | 13                       | 633      | 272               | 43.0                  | 209                               | 76.8                                  | 17     |
| 17 | DCTN2                      | DCTN2      | 12                       | 606      | 304               | 50.2                  | 238                               | 78.3                                  | 55     |
| 18 | DENND5A                    | RAB6IP1    | 11                       | 732      | 459               | 62.7                  | 413                               | 90.0                                  | 70     |
| 19 | DMRT1                      | DMRT1      | 9                        | 557      | 245               | 44.0                  | 191                               | 78.0                                  | 29     |
| 20 | ERC2                       | ERC2       | 3                        | 750      | 419               | 55.9                  | 326                               | 77.8                                  | 33     |
| 21 | FAM123B                    | FAM123B    | X                        | 737      | 355               | 48.2                  | 299                               | 84.2                                  | 10     |
| 22 | FBN1                       | FBN1       | 15                       | 722      | 265               | 36.7                  | 179                               | 67.5                                  | 0      |
| 23 | FES                        | FES        | 15                       | 473      | 298               | 63.0                  | 257                               | 86.2                                  | 33     |
| 24 | FOXP1                      | FOXP1      | 3                        | 572      | 263               | 46.0                  | 188                               | 71.5                                  | 3      |
| 25 | GHR                        | GHR        | 5                        | 668      | 399               | 59.7                  | 285                               | 71.4                                  | 21     |
| 26 | KCNMA1                     | KCNMA1     | 10                       | 622      | 239               | 38.4                  | 178                               | 74.5                                  | 14     |
| 27 | KDM5C                      | SMCX       | X                        | 330      | 165               | 50.0                  | 136                               | 82.4                                  | 13     |
| 28 | KDM5D                      | SMCY       | Y                        | 993      | 660               | 66.5                  | 523                               | 79.2                                  | 46     |
| 29 | LRPPRC                     | LRPPRC_169 | 2                        | 801      | 442               | 55.2                  | 305                               | 69.0                                  | 31     |
| 30 | LRPPRC                     | LRPPRC_171 | 2                        | 776      | 388               | 50.0                  | 287                               | 74.0                                  | 34     |
| 31 | LUC7L                      | LUCL7      | 16                       | 696      | 375               | 53.9                  | 294                               | 78.4                                  | 61     |
| 32 | MAPKAP1                    | MAPKAP1    | 9                        | 664      | 192               | 28.9                  | 125                               | 65.1                                  | 5      |
| 33 | MBD5                       | MBD5       | 2                        | 558      | 138               | 24.7                  | 93                                | 67.4                                  | 13     |
| 34 | NEGR1                      | NEGR1      | 1                        | 560      | 178               | 31.8                  | 126                               | 70.8                                  | 5      |
| 35 | NPAS3                      | NPAS3      | 14                       | 623      | 168               | 27.0                  | 129                               | 76.8                                  | 9      |
| 36 | NPAS3                      | NPAS3.2    | 14                       | 669      | 352               | 52.6                  | 289                               | 82.1                                  | 36     |
| 37 | PLCB4                      | PLCB4      | 20                       | 342      | 190               | 55.6                  | 155                               | 81.6                                  | 19     |
| 38 | PNOC                       | PNOC       | 8                        | 324      | 168               | 51.9                  | 131                               | 78.0                                  | 1      |
| 39 | POLA1                      | POLA1      | X                        | 615      | 244               | 39.7                  | 200                               | 82.0                                  | 19     |
| 40 | RAG1                       | RAG1       | 11                       | 1071     | 381               | 35.6                  | 307                               | 80.6                                  | 0      |
| 41 | RAG2                       | RAG2       | 11                       | 760      | 353               | 46.4                  | 244                               | 69.1                                  | 0      |
| 42 | RPGRIP1                    | RPGRIP1    | 14                       | 711      | 322               | 45.3                  | 269                               | 83.5                                  | 11     |
| 43 | S1PR1                      | EDG1       | 1                        | 999      | 299               | 29.9                  | 239                               | 79.9                                  | 0      |
| 44 | SGMS1                      | SGMS1      | 10                       | 615      | 133               | 21.6                  | 105                               | 78.9                                  | 9      |
| 45 | SIM1                       | SIM1       | 6                        | 668      | 159               | 23.8                  | 109                               | 68.6                                  | 4      |
| 46 | SRY                        | SRY        | Y                        | 642      | 256               | 39.9                  | 192                               | 75.0                                  | 8      |
| 47 | TEX2                       | TEX2       | 17                       | 156      | 55                | 35.3                  | 46                                | 83.6                                  | 0      |
| 48 | TTR                        | TTR        | 18                       | 880      | 574               | 65.2                  | 436                               | 76.0                                  | 39     |
| 49 | TYR                        | TYR        | 11                       | 475      | 192               | 40.4                  | 164                               | 85.4                                  | 0      |
| 50 | USH2A                      | USH2A      | 1                        | 605      | 129               | 21.3                  | 82                                | 63.6                                  | 7      |
| 51 | UTY                        | UTY        | Y                        | 371      | 217               | 58.5                  | 184                               | 84.8                                  | 3      |
| 52 | ZFX                        | ZFX        | X                        | 811      | 431               | 53.1                  | 342                               | 79.4                                  | 54     |
| 53 | ZFY                        | ZFY        | Y                        | 986      | 403               | 40.9                  | 264                               | 65.5                                  | 13     |
| 54 | ZIC3                       | ZIC3       | X                        | 549      | 172               | 31.3                  | 113                               | 65.7                                  | 12     |
