# Supplementary material
Source: PubMed Central journal article supplement (PMC3060065)
Supplement: pgen.1001342.s018.pdf [file pgen.1001342.s018.pdf]

Table S5. Synapomorphic and autapomorphic indels listed by branch node in Figure 2.

| Node#/species | Gene       | coordinates<br>START | coordinates<br>END | Size of indel |
|---------------|------------|----------------------|--------------------|---------------|
| 4             | ERC2       | 34708                | 34710              | 3             |
| 12            | CHRNA1     | 7322                 | 7344               | 23            |
| 13            | AFF2       | 1445                 | 1447               | 3             |
| 13            | KCNMA1     | 13858                | 13858              | 1             |
| 13            | LRPPRC_169 | 14090                | 14175              | 86            |
| 16            | LRPPRC_171 | 14806                | 14817              | 12            |
| 22            | NPAS3.2    | 18734                | 18740              | 7             |
| 23            | TTR        | 25611                | 25611              | 1             |
| 23            | ERC2       | 34474                | 34479              | 6             |
| 24            | SRY        | 24849                | 24851              | 3             |
| 24            | ZFX        | 27600                | 27617              | 18            |
| 27            | ZFY        | 28524                | 28525              | 2             |
| 31            | MAPKAP1    | 16517                | 16519              | 3             |
| 34            | ZFX        | 27752                | 27753              | 2             |
| 34            | DCTN2      | 31471                | 31473              | 3             |
| 35            | ZFX        | 27640                | 27649              | 10            |
| 42            | LRPPRC_169 | 14029                | 14031              | 3             |
| 42            | NPAS3.2    | 18808                | 18808              | 1             |
| 42            | SRY        | 24908                | 24913              | 6             |
| 42            | ZFY        | 28544                | 28544              | 1             |
| 52            | CFTR       | 6550                 | 6550               | 1             |
| 53            | AFF2       | 1028                 | 1029               | 2             |
| 53            | ZFX        | 27598                | 27600              | 3             |
| 53            | ZFY        | 28618                | 28626              | 9             |
| 56            | LRPPRC_169 | 14297                | 14299              | 3             |
| 56            | ZFX        | 27881                | 27881              | 1             |
| 56            | ZFX        | 28089                | 28092              | 4             |
| 60            | TTR        | 25971                | 25971              | 1             |
| 60            | ERC2       | 34401                | 34403              | 3             |
| 61            | CFTR       | 6923                 | 6923               | 1             |
| 61            | LUC7L      | 15711                | 15712              | 2             |
| 62            | LUC7L      | 15763                | 15763              | 1             |
| 62            | NPAS3.2    | 18658                | 18600              | 3             |
| 62            | TTR        | 25657                | 25657              | 1             |
| 62            | TTR        | 25753                | 25753              | 1             |
| 62            | ZFX        | 27624                | 27627              | 4             |
| 62            | ZFY        | 28709                | 28713              | 5             |
| 62            | DCTN2      | 31335                | 31339              | 5             |
| 62            | DCTN2      | 31709                | 31710              | 2             |
| 63            | BRCA2      | 5806                 | 5820               | 15            |
| 63            | SMCY       | 24112                | 24113              | 2             |
| 63            | SMCY       | 24334                | 24334              | 1             |
| 63            | ZIC3       | 29467                | 29467              | 1             |
| 65            | ZFX        | 28282                | 28292              | 11            |
| 69            | CHRNA1     | 7153                 | 7153               | 1             |
| 69            | RPGRIP1    | 21853                | 21877              | 25            |
| 70            | BRCA2      | 6210                 | 6212               | 3             |

Table S5. Synapomorphic and autapomorphic indels listed by branch node in Figure 2.

|    |            |       |       |    |
|----|------------|-------|-------|----|
| 70 | SMCY       | 24103 | 24106 | 4  |
| 70 | ZIC3       | 29474 | 29475 | 2  |
| 72 | SMCY       | 24398 | 24400 | 3  |
| 72 | TTR        | 25836 | 25836 | 1  |
| 74 | CREM       | 8499  | 8505  | 7  |
| 74 | NPAS3      | 18115 | 18115 | 1  |
| 74 | SMCX       | 23490 | 23492 | 3  |
| 75 | RAB6IP1    | 33735 | 33738 | 4  |
| 76 | NPAS3.2    | 18898 | 18901 | 4  |
| 76 | RPGRIP1    | 21886 | 21886 | 1  |
| 76 | RAB6IP1    | 33888 | 33891 | 4  |
| 77 | DACH1      | 9366  | 9367  | 2  |
| 77 | FES        | 11878 | 11879 | 2  |
| 77 | DCTN2      | 31328 | 31329 | 2  |
| 77 | POLA1      | 33295 | 33295 | 1  |
| 77 | RAB6IP1    | 33726 | 33726 | 1  |
| 78 | CFTR       | 6327  | 6327  | 1  |
| 78 | CREM       | 8569  | 8577  | 9  |
| 78 | FES        | 11837 | 11839 | 3  |
| 78 | GHR        | 13005 | 13005 | 1  |
| 78 | LRPPRC_169 | 14260 | 14262 | 2  |
| 78 | LRPPRC_171 | 14958 | 14958 | 1  |
| 78 | LRPPRC_171 | 14997 | 15010 | 14 |
| 78 | LUC7L      | 15670 | 15671 | 2  |
| 78 | SMCY       | 24322 | 24334 | 13 |
| 78 | ZFX        | 27575 | 27575 | 1  |
| 78 | ZFX        | 27793 | 27794 | 2  |
| 78 | ZFX        | 27924 | 27928 | 5  |
| 78 | ZFY        | 28448 | 28451 | 4  |
| 78 | ZFY        | 28522 | 28525 | 4  |
| 78 | ZFY        | 28667 | 28675 | 9  |
| 78 | POLA1      | 32954 | 32954 | 1  |
| 78 | RAB6IP1    | 33624 | 33630 | 7  |
| 78 | RAB6IP1    | 33648 | 33649 | 2  |
| 82 | LUC7L      | 15651 | 15651 | 1  |
| 82 | MBD5       | 17031 | 17032 | 2  |
| 82 | POLA1      | 32969 | 32969 | 1  |
| 84 | AFF2       | 1136  | 1145  | 10 |
| 85 | USH2A      | 26634 | 26634 | 1  |
| 86 | CHRNA1     | 7354  | 7354  | 1  |
| 86 | ZIC3       | 29491 | 29491 | 1  |
| 87 | LRPPRC_171 | 15183 | 15183 | 1  |
| 87 | LUC7L      | 15779 | 15782 | 4  |
| 87 | MBD5       | 16953 | 16954 | 2  |
| 87 | MBD5       | 17105 | 17105 | 1  |
| 87 | PLCB4      | 19405 | 19407 | 3  |
| 87 | RPGRIP1    | 21843 | 21843 | 1  |
| 87 | SMCY       | 24082 | 24083 | 2  |
| 87 | TTR        | 25926 | 25927 | 2  |

Table S5. Synapomorphic and autapomorphic indels listed by branch node in Figure 2.

|     |            |       |       |    |
|-----|------------|-------|-------|----|
| 87  | ZIC3       | 29318 | 29335 | 18 |
| 87  | ATXN7      | 30044 | 30044 | 1  |
| 87  | DCTN2      | 31560 | 31562 | 3  |
| 94  | ZFX        | 28161 | 28162 | 2  |
| 96  | CREM       | 8617  | 8619  | 3  |
| 96  | DACH1      | 9123  | 9126  | 4  |
| 96  | DMRT1      | 9741  | 9744  | 4  |
| 96  | GHR        | 12985 | 12987 | 3  |
| 96  | LRPPRC_171 | 14934 | 14936 | 3  |
| 96  | LUC7L      | 15891 | 15908 | 18 |
| 96  | RAB6IP1    | 33775 | 33775 | 1  |
| 97  | BRCA2      | 5311  | 5331  | 21 |
| 97  | NPAS3.2    | 18891 | 18891 | 1  |
| 97  | PLCB4      | 19442 | 19445 | 4  |
| 97  | SMCX       | 23441 | 23450 | 10 |
| 97  | ZFX        | 27695 | 27696 | 2  |
| 97  | RAB6IP1    | 33534 | 33534 | 1  |
| 97  | RAB6IP1    | 33677 | 33677 | 1  |
| 98  | APP        | 2649  | 2649  | 1  |
| 98  | BRCA2      | 5607  | 5618  | 12 |
| 98  | BRCA2      | 6212  | 6220  | 9  |
| 98  | DMRT1      | 9537  | 9542  | 6  |
| 98  | DMRT1      | 9788  | 9789  | 2  |
| 98  | GHR        | 12952 | 12954 | 3  |
| 98  | NEGR1      | 17622 | 17622 | 1  |
| 98  | TTR        | 25300 | 25317 | 18 |
| 98  | TTR        | 25752 | 25756 | 5  |
| 98  | ZFY        | 28606 | 28625 | 20 |
| 98  | ZFY        | 28657 | 28657 | 1  |
| 98  | ATXN7      | 30036 | 30037 | 2  |
| 98  | RAB6IP1    | 33532 | 33535 | 4  |
| 98  | RAB6IP1    | 33901 | 33901 | 1  |
| 98  | RAB6IP1    | 33954 | 33954 | 1  |
| 103 | TTR        | 25520 | 25520 | 1  |
| 104 | TTR        | 25469 | 25469 | 1  |
| 106 | ERC2       | 34620 | 34622 | 3  |
| 107 | DACH1      | 9282  | 9282  | 1  |
| 107 | GHR        | 12910 | 12912 | 3  |
| 107 | RPGRIP1    | 21869 | 21876 | 8  |
| 108 | ABCA1      | 420   | 423   | 4  |
| 108 | AFF2       | 1085  | 1085  | 1  |
| 110 | CHRNA1     | 7259  | 7259  | 1  |
| 110 | PLCB4      | 19374 | 19374 | 1  |
| 110 | TTR        | 25472 | 25474 | 3  |
| 110 | ZFX        | 27695 | 27695 | 1  |
| 110 | DCTN2      | 31427 | 31428 | 2  |
| 111 | SIM1       | 23263 | 23263 | 1  |
| 113 | KCNMA1     | 13844 | 13844 | 1  |
| 113 | PLCB4      | 19328 | 19328 | 1  |

Table S5. Synapomorphic and autapomorphic indels listed by branch node in Figure 2.

|     |         |       |       |    |
|-----|---------|-------|-------|----|
| 118 | ABCA1   | 451   | 451   | 1  |
| 118 | FOXP1   | 12526 | 12526 | 1  |
| 118 | NPAS3.2 | 18817 | 18817 | 1  |
| 118 | SMCY    | 23870 | 23882 | 13 |
| 118 | SMCY    | 23916 | 23917 | 2  |
| 118 | SMCY    | 24187 | 24187 | 1  |
| 119 | FES     | 11866 | 11868 | 3  |
| 120 | TTR     | 25997 | 25997 | 1  |
| 122 | TTR     | 25833 | 25833 | 1  |
| 122 | ZFX     | 27711 | 27713 | 3  |
| 122 | DCTN2   | 31334 | 31335 | 2  |
| 123 | TTR     | 25931 | 25932 | 2  |
| 125 | APP     | 2278  | 2278  | 1  |
| 125 | DMRT1   | 9679  | 9680  | 2  |
| 125 | DMRT1   | 9833  | 9840  | 8  |
| 125 | LUC7L   | 16053 | 16053 | 1  |
| 125 | LUC7L   | 16095 | 16095 | 1  |
| 125 | ERC2    | 34362 | 34362 | 1  |
| 126 | FOXP1   | 12639 | 12640 | 2  |
| 126 | PLCB4   | 19330 | 19336 | 7  |
| 126 | TTR     | 25792 | 25792 | 1  |
| 126 | POLA1   | 33085 | 33090 | 6  |
| 135 | SMCY    | 24028 | 24028 | 1  |
| 135 | ERC2    | 34460 | 34460 | 1  |
| 136 | TTR     | 25601 | 25601 | 1  |
| 137 | SRY     | 24913 | 24927 | 15 |
| 138 | ZFX     | 27635 | 27636 | 2  |
| 139 | CFTR    | 6939  | 6941  | 3  |
| 139 | DACH1   | 9270  | 9274  | 5  |
| 140 | LUC7L   | 15984 | 15986 | 3  |
| 140 | LUC7L   | 16199 | 16202 | 4  |
| 140 | ZFX     | 27699 | 27704 | 6  |
| 140 | RAB6IP1 | 33648 | 33655 | 8  |
| 141 | UTY     | 27440 | 27445 | 6  |
| 142 | CREM    | 8692  | 8692  | 1  |
| 142 | DMRT1   | 9578  | 9581  | 4  |
| 142 | FES     | 11851 | 11851 | 1  |
| 142 | FES     | 12000 | 12002 | 3  |
| 142 | FES     | 12082 | 12082 | 1  |
| 142 | KCNMA1  | 13527 | 13527 | 1  |
| 142 | KCNMA1  | 13770 | 13770 | 1  |
| 142 | MBD5    | 16989 | 16992 | 4  |
| 142 | NPAS3.2 | 18789 | 18789 | 1  |
| 142 | PLCB4   | 19425 | 19426 | 2  |
| 142 | SGMS1   | 22432 | 22432 | 1  |
| 142 | TTR     | 25331 | 25331 | 1  |
| 142 | USH2A   | 27036 | 27036 | 1  |
| 142 | USH2A   | 27073 | 27073 | 1  |
| 142 | ZIC3    | 29599 | 29600 | 2  |

Table S5. Synapomorphic and autapomorphic indels listed by branch node in Figure 2.

|     |            |       |       |    |
|-----|------------|-------|-------|----|
| 142 | ATXN7      | 29815 | 29817 | 3  |
| 142 | DCTN2      | 31340 | 31341 | 2  |
| 142 | POLA1      | 33199 | 33201 | 3  |
| 142 | RAB6IP1    | 33572 | 33572 | 1  |
| 142 | RAB6IP1    | 33611 | 33625 | 15 |
| 142 | RAB6IP1    | 33674 | 33674 | 1  |
| 142 | RAB6IP1    | 33767 | 33767 | 1  |
| 142 | RAB6IP1    | 33795 | 33795 | 1  |
| 142 | RAB6IP1    | 33823 | 33823 | 1  |
| 142 | RAB6IP1    | 33867 | 33867 | 1  |
| 144 | CHRNA1     | 7171  | 7182  | 12 |
| 144 | CHRNA1     | 7224  | 7229  | 6  |
| 144 | CHRNA1     | 7363  | 7366  | 4  |
| 144 | LRPPRC_171 | 14874 | 14879 | 6  |
| 144 | LRPPRC_171 | 15022 | 15032 | 11 |
| 144 | NPAS3.2    | 18744 | 18744 | 1  |
| 144 | SMCX       | 23479 | 23488 | 10 |
| 144 | DCTN2      | 31663 | 31663 | 1  |
| 144 | ERC2       | 34318 | 34321 | 4  |
| 146 | SGMS1      | 22267 | 22267 | 1  |
| 147 | AFF2       | 1136  | 1136  | 1  |
| 147 | DMRT1      | 9743  | 9746  | 4  |
| 147 | LRPPRC_171 | 15001 | 15003 | 3  |
| 148 | DMRT1      | 9778  | 9789  | 12 |
| 148 | FES        | 11851 | 11864 | 14 |
| 148 | NPAS3      | 18178 | 18182 | 5  |
| 148 | NPAS3.2    | 18971 | 18983 | 13 |
| 148 | RPGRIP1    | 21836 | 21837 | 2  |
| 148 | ZIC3       | 29340 | 29341 | 2  |
| 148 | ATXN7      | 30104 | 30127 | 24 |
| 148 | DCTN2      | 31585 | 31595 | 11 |
| 148 | RAB6IP1    | 33805 | 33806 | 2  |
| 149 | FES        | 12050 | 12058 | 8  |
| 149 | FES        | 12069 | 12069 | 1  |
| 150 | ABCA1      | 279   | 290   | 12 |
| 150 | CFTR       | 6364  | 6369  | 6  |
| 150 | LRPPRC_171 | 14830 | 14837 | 8  |
| 150 | RAB6IP1    | 33986 | 33990 | 5  |
| 151 | CFTR       | 6340  | 6348  | 9  |
| 151 | CFTR       | 6573  | 6585  | 13 |
| 151 | CNR1       | 7538  | 7540  | 3  |
| 151 | DCTN2      | 31580 | 31580 | 1  |
| 151 | ERC2       | 34252 | 34252 | 1  |
| 154 | DMRT1      | 9817  | 9817  | 1  |
| 155 | ABCA1      | 378   | 382   | 5  |
| 155 | NPAS3.2    | 19008 | 19009 | 2  |
| 156 | FES        | 11839 | 11886 | 48 |
| 156 | NPAS3.2    | 19128 | 19129 | 2  |
| 156 | SMCY       | 23777 | 23781 | 5  |

Table S5. Synapomorphic and autapomorphic indels listed by branch node in Figure 2.

|     |            |       |       |    |
|-----|------------|-------|-------|----|
| 156 | RAB6IP1    | 33948 | 33952 | 5  |
| 157 | GHR        | 12811 | 12817 | 7  |
| 157 | LRPPRC_169 | 14505 | 14508 | 4  |
| 157 | NPAS3.2    | 18961 | 18961 | 1  |
| 157 | NPAS3.2    | 19026 | 19026 | 1  |
| 157 | PLCB4      | 19400 | 19400 | 1  |
| 157 | RPGRIP1    | 21870 | 21870 | 1  |
| 157 | SGMS1      | 22302 | 22308 | 7  |
| 157 | POLA1      | 33128 | 33128 | 1  |
| 157 | RAB6IP1    | 33689 | 33690 | 2  |
| 167 | CFTR       | 6319  | 6319  | 1  |
| 167 | LUC7L      | 16065 | 16068 | 4  |
| 167 | SMCY       | 23685 | 23685 | 1  |
| 167 | SMCY       | 24435 | 24437 | 3  |
| 168 | CHRNA1     | 7196  | 7219  | 24 |
| 168 | NPAS3.2    | 18927 | 18931 | 5  |
| 168 | SMCX       | 23465 | 23465 | 1  |
| 168 | FAM123B    | 32170 | 32199 | 30 |
| 169 | NPAS3.2    | 19000 | 19001 | 2  |
| 170 | GHR        | 12976 | 12978 | 3  |
| 171 | CFTR       | 6698  | 6698  | 1  |
| 171 | CFTR       | 7032  | 7032  | 1  |
| 171 | DACH1      | 9186  | 9188  | 3  |
| 171 | LRPPRC_171 | 14928 | 14928 | 1  |
| 171 | SMCY       | 24020 | 24026 | 7  |
| 172 | FES        | 11851 | 11866 | 16 |
| 173 | ABCA1      | 34    | 35    | 2  |
| 173 | ABCA1      | 52    | 52    | 1  |
| 173 | ABCA1      | 346   | 346   | 1  |
| 173 | LRPPRC_171 | 14807 | 14808 | 2  |
| 173 | LUC7L      | 15778 | 15783 | 6  |
| 173 | LUC7L      | 16062 | 16064 | 3  |
| 173 | RAB6IP1    | 33840 | 33840 | 1  |
| 173 | RAB6IP1    | 33923 | 33923 | 1  |
| 173 | RAB6IP1    | 33996 | 33996 | 1  |
| 174 | LUC7L      | 16016 | 16016 | 1  |
| 175 | ABCA1      | 337   | 337   | 1  |
| 175 | RAB6IP1    | 34077 | 34077 | 1  |
| 175 | ERC2       | 34389 | 34393 | 5  |
| 176 | ZFX        | 27593 | 27595 | 3  |
| 176 | DCTN2      | 31524 | 31528 | 5  |
| 176 | RAB6IP1    | 33555 | 33556 | 2  |
| 176 | RAB6IP1    | 33890 | 33893 | 4  |
| 177 | CHRNA1     | 7206  | 7206  | 1  |
| 177 | LRPPRC_169 | 14165 | 14165 | 1  |
| 177 | LRPPRC_169 | 14523 | 14537 | 14 |
| 177 | LUC7L      | 15893 | 15893 | 1  |
| 177 | MAPKAP1    | 16329 | 16330 | 2  |
| 177 | NPAS3      | 18173 | 18173 | 1  |

Table S5. Synapomorphic and autapomorphic indels listed by branch node in Figure 2.

|     |            |       |       |    |
|-----|------------|-------|-------|----|
| 177 | PLCB4      | 19403 | 19403 | 1  |
| 178 | MAPKAP1    | 16725 | 16726 | 2  |
| 178 | ERC2       | 34526 | 34526 | 1  |
| 181 | APP        | 2342  | 2344  | 3  |
| 181 | CFTR       | 6939  | 6950  | 12 |
| 181 | ERC2       | 34484 | 34489 | 6  |
| 182 | RPGRIP1    | 21371 | 21373 | 3  |
| 182 | RAB6IP1    | 33937 | 33937 | 1  |
| 183 | NPAS3.2    | 18910 | 18910 | 1  |
| 183 | PLCB4      | 19341 | 19341 | 1  |
| 183 | ATXN7      | 30167 | 30167 | 1  |
| 184 | CHRNA1     | 7096  | 7096  | 1  |
| 184 | DMRT1      | 9815  | 9815  | 1  |
| 184 | KCNMA1     | 13586 | 13595 | 11 |
| 184 | LUC7L      | 16074 | 16076 | 3  |
| 184 | NPAS3.2    | 18879 | 18880 | 2  |
| 184 | SMCX       | 23513 | 23516 | 4  |
| 184 | ZIC3       | 29496 | 29496 | 1  |
| 184 | ATXN7      | 30107 | 30113 | 7  |
| 184 | DCTN2      | 31337 | 31338 | 2  |
| 184 | DCTN2      | 31432 | 31442 | 11 |
| 184 | DCTN2      | 31476 | 31476 | 1  |
| 184 | RAB6IP1    | 33543 | 33547 | 5  |
| 184 | RAB6IP1    | 33611 | 33611 | 1  |
| 184 | ERC2       | 34707 | 34709 | 3  |
| 186 | APP        | 2212  | 2215  | 4  |
| 186 | APP        | 2296  | 2298  | 3  |
| 186 | APP        | 2427  | 2427  | 1  |
| 186 | CHRNA1     | 7148  | 7148  | 1  |
| 186 | CHRNA1     | 7336  | 7337  | 2  |
| 186 | DMRT1      | 9600  | 9600  | 1  |
| 186 | DMRT1      | 9707  | 9709  | 3  |
| 186 | KCNMA1     | 13770 | 13775 | 6  |
| 186 | LRPPRC_171 | 14840 | 14841 | 2  |
| 186 | LRPPRC_171 | 14847 | 14847 | 1  |
| 186 | LRPPRC_171 | 14973 | 14979 | 7  |
| 186 | LRPPRC_171 | 15093 | 15094 | 2  |
| 186 | LUC7L      | 15868 | 15868 | 1  |
| 186 | LUC7L      | 15883 | 15883 | 1  |
| 186 | LUC7L      | 16159 | 16159 | 1  |
| 186 | MBD5       | 17039 | 17039 | 1  |
| 186 | NEGR1      | 17684 | 17684 | 1  |
| 186 | NEGR1      | 17740 | 17741 | 2  |
| 186 | NPAS3.2    | 19058 | 19058 | 1  |
| 186 | NPAS3.2    | 19088 | 19089 | 2  |
| 186 | PLCB4      | 19519 | 19519 | 1  |
| 186 | PLCB4      | 19562 | 19565 | 4  |
| 186 | SGMS1      | 22479 | 22480 | 2  |
| 186 | SMCX       | 23493 | 23493 | 1  |

Table S5. Synapomorphic and autapomorphic indels listed by branch node in Figure 2.

|     |         |       |       |    |
|-----|---------|-------|-------|----|
| 186 | USH2A   | 27044 | 27044 | 1  |
| 186 | ATXN7   | 30072 | 30077 | 6  |
| 186 | ATXN7   | 30089 | 30091 | 3  |
| 186 | DCTN2   | 31426 | 31426 | 1  |
| 186 | DCTN2   | 31572 | 31573 | 2  |
| 186 | DCTN2   | 31588 | 31589 | 2  |
| 186 | DCTN2   | 31601 | 31601 | 1  |
| 186 | PNOC    | 32764 | 32777 | 14 |
| 186 | POLA1   | 33364 | 33364 | 1  |
| 186 | RAB6IP1 | 33754 | 33754 | 1  |
| 186 | RAB6IP1 | 33795 | 33819 | 25 |
| 186 | RAB6IP1 | 33842 | 33842 | 1  |
| 186 | ERC2    | 34323 | 34323 | 1  |
| 186 | ERC2    | 34340 | 34341 | 2  |
| 186 | ERC2    | 34518 | 34535 | 18 |
| 188 | AFF2    | 1120  | 1120  | 1  |
| 188 | AFF2    | 1253  | 1253  | 1  |
| 188 | APP     | 2684  | 2684  | 1  |
| 188 | AXIN1   | 3588  | 3601  | 14 |
| 188 | AXIN1   | 3643  | 3643  | 1  |
| 188 | CREM    | 8476  | 8476  | 1  |
| 188 | CREM    | 8520  | 8522  | 3  |
| 188 | CREM    | 8653  | 8654  | 2  |
| 188 | CREM    | 8675  | 8675  | 1  |
| 188 | FES     | 11837 | 11837 | 1  |
| 188 | FES     | 11979 | 11980 | 2  |
| 188 | FES     | 12085 | 12085 | 1  |
| 188 | KCNMA1  | 13522 | 13522 | 1  |
| 188 | KCNMA1  | 13814 | 13815 | 2  |
| 188 | LUC7L   | 15651 | 15665 | 15 |
| 188 | LUC7L   | 15814 | 15817 | 4  |
| 188 | LUC7L   | 15970 | 15971 | 2  |
| 188 | LUC7L   | 15996 | 15996 | 1  |
| 188 | LUC7L   | 16062 | 16073 | 12 |
| 188 | LUC7L   | 16100 | 16100 | 1  |
| 188 | MAPKAP1 | 16353 | 16353 | 1  |
| 188 | MBD5    | 17090 | 17090 | 1  |
| 188 | NEGR1   | 17773 | 17773 | 1  |
| 188 | NPAS3.2 | 19001 | 19005 | 5  |
| 188 | RPGRIP1 | 21843 | 21845 | 3  |
| 188 | SGMS1   | 22308 | 22308 | 1  |
| 188 | SGMS1   | 22425 | 22426 | 2  |
| 188 | SMCX    | 23424 | 23449 | 26 |
| 188 | TTR     | 25262 | 25263 | 2  |
| 188 | ZIC3    | 29385 | 29386 | 2  |
| 188 | ZIC3    | 29441 | 29441 | 1  |
| 188 | ZIC3    | 29468 | 29468 | 1  |
| 188 | ATXN7   | 30043 | 30043 | 1  |
| 188 | DCTN2   | 31537 | 31539 | 3  |

Table S5. Synapomorphic and autapomorphic indels listed by branch node in Figure 2.

|                                    |            |       |       |     |
|------------------------------------|------------|-------|-------|-----|
| 188                                | DCTN2      | 31668 | 31669 | 2   |
| 188                                | FAM123B    | 31981 | 31989 | 9   |
| 188                                | POLA1      | 32999 | 32999 | 1   |
| 188                                | RAB6IP1    | 33553 | 33556 | 4   |
| 188                                | RAB6IP1    | 33601 | 33601 | 1   |
| 142+186                            | DCTN2      | 31411 | 31411 | 1   |
| 144+142                            | ZFX        | 27730 | 28041 | 312 |
| 144+142+186+188                    | PLCB4      | 19339 | 19339 | 1   |
| 144+142+186+188                    | POLA1      | 33222 | 33222 | 1   |
| <i>Allenopithecus nigroviridis</i> | FAM123B    | 31967 | 31968 | 2   |
| <i>Alouatta belzebul</i>           | ABCA1      | 154   | 154   | 1   |
| <i>Alouatta caraya</i>             | TTR        | 25534 | 25543 | 10  |
| <i>Aotus azarae</i>                | DCTN2      | 31369 | 31370 | 2   |
| <i>Aotus trivigatus</i>            | LUC7L      | 16008 | 16020 | 13  |
| <i>Arctocebus calabarensis</i>     | ABCA1      | 28    | 36    | 10  |
| <i>Arctocebus calabarensis</i>     | ABCA1      | 486   | 486   | 1   |
| <i>Arctocebus calabarensis</i>     | ABCA1      | 501   | 501   | 1   |
| <i>Arctocebus calabarensis</i>     | CFTR       | 6513  | 6540  | 28  |
| <i>Arctocebus calabarensis</i>     | CFTR       | 6986  | 6990  | 5   |
| <i>Arctocebus calabarensis</i>     | CHRNA1     | 7149  | 7149  | 1   |
| <i>Arctocebus calabarensis</i>     | CHRNA1     | 7347  | 7354  | 8   |
| <i>Arctocebus calabarensis</i>     | GHR        | 12978 | 12978 | 1   |
| <i>Arctocebus calabarensis</i>     | GHR        | 13217 | 13222 | 6   |
| <i>Arctocebus calabarensis</i>     | LUC7L      | 15837 | 15837 | 1   |
| <i>Arctocebus calabarensis</i>     | LUC7L      | 16139 | 16139 | 1   |
| <i>Arctocebus calabarensis</i>     | ATXN7      | 30087 | 30093 | 7   |
| <i>Arctocebus calabarensis</i>     | FAM123B    | 32178 | 32222 | 45  |
| <i>Arctocebus calabarensis</i>     | POLA1      | 33308 | 33309 | 2   |
| <i>Arctocebus calabarensis</i>     | RAB6IP1    | 33859 | 33872 | 14  |
| <i>Arctocebus calabarensis</i>     | ERC2       | 34198 | 34204 | 7   |
| <i>Avahi laniger</i>               | MBD5       | 17045 | 17047 | 3   |
| <i>Avahi laniger</i>               | NPAS3      | 18229 | 18229 | 1   |
| <i>Avahi laniger</i>               | NPAS3.2    | 18690 | 18695 | 6   |
| <i>Avahi laniger</i>               | NPAS3.2    | 18830 | 18833 | 4   |
| <i>Avahi laniger</i>               | FAM123B    | 32126 | 32185 | 60  |
| <i>Avahi laniger</i>               | POLA1      | 32920 | 32931 | 12  |
| <i>Avahi laniger</i>               | RAB6IP1    | 33947 | 33969 | 23  |
| <i>Callicebus moloch</i>           | POLA1      | 33133 | 33143 | 11  |
| <i>Callimico goeldi</i>            | DCTN2      | 31630 | 31636 | 7   |
| <i>Callimico goeldii</i>           | ABCA1      | 186   | 186   | 1   |
| <i>Callimico goeldii</i>           | ABCA1      | 189   | 191   | 3   |
| <i>Callimico goeldii</i>           | CREM       | 8658  | 8658  | 1   |
| <i>Callimico goeldii</i>           | LRPPRC_169 | 14460 | 14460 | 1   |
| <i>Callimico goeldii</i>           | NPAS3.2    | 18737 | 18737 | 1   |
| <i>Callimico goeldii</i>           | SMCY       | 24458 | 24461 | 4   |
| <i>Callimico goeldii</i>           | TTR        | 25736 | 25737 | 2   |
| <i>Callimico goeldii (ind)</i>     | MBD5       | 17342 | 17342 | 1   |
| <i>Callithrix pygmaea</i>          | ABCA1      | 406   | 410   | 5   |
| <i>Cebus olivaceus</i>             | ERC2       | 34593 | 34597 | 5   |

Table S5. Synapomorphic and autapomorphic indels listed by branch node in Figure 2.

|                                     |            |       |       |    |
|-------------------------------------|------------|-------|-------|----|
| <i>Cebus xanthosternos</i>          | FES        | 11935 | 12006 | 72 |
| <i>Cercocebus torquatus</i>         | ZFX        | 27821 | 27827 | 7  |
| <i>Cercopithecus diana</i>          | CFTR       | 6430  | 6430  | 1  |
| <i>Cercopithecus neglectus</i>      | TTR        | 25304 | 25308 | 5  |
| <i>Cheirogaleus medius</i>          | ABCA1      | 18    | 20    | 3  |
| <i>Cheirogaleus medius</i>          | ABCA1      | 155   | 166   | 12 |
| <i>Cheirogaleus medius</i>          | BRCA2      | 5839  | 5841  | 3  |
| <i>Cheirogaleus medius</i>          | CFTR       | 6715  | 6718  | 4  |
| <i>Cheirogaleus medius</i>          | NPAS3.2    | 19127 | 19128 | 2  |
| <i>Cheirogaleus medius</i>          | ATXN7      | 30107 | 30114 | 8  |
| <i>Colobus angolensis</i>           | ZFY        | 28442 | 28444 | 3  |
| <i>Colobus guereza</i>              | FOXP1      | 12288 | 12288 | 1  |
| <i>Daubentonia madagascariensis</i> | AFF2       | 1252  | 1253  | 2  |
| <i>Daubentonia madagascariensis</i> | CFTR       | 6600  | 6677  | 78 |
| <i>Daubentonia madagascariensis</i> | CFTR       | 6715  | 6719  | 5  |
| <i>Daubentonia madagascariensis</i> | DMRT1      | 9848  | 9852  | 5  |
| <i>Daubentonia madagascariensis</i> | LUC7L      | 16119 | 16119 | 1  |
| <i>Daubentonia madagascariensis</i> | MAPKAP1    | 16349 | 16349 | 1  |
| <i>Daubentonia madagascariensis</i> | NPAS3.2    | 18883 | 18886 | 4  |
| <i>Daubentonia madagascariensis</i> | SMCY       | 23946 | 23953 | 8  |
| <i>Daubentonia madagascariensis</i> | SMCY       | 24457 | 24461 | 5  |
| <i>Daubentonia madagascariensis</i> | DCTN2      | 31388 | 31388 | 1  |
| <i>Daubentonia madagascariensis</i> | DCTN2      | 31626 | 31628 | 3  |
| <i>Daubentonia madagascariensis</i> | DCTN2      | 31661 | 31666 | 6  |
| <i>Daubentonia madagascariensis</i> | RAB6IP1    | 33862 | 33869 | 8  |
| <i>Daubentonia madagascariensis</i> | RAB6IP1    | 34021 | 34030 | 10 |
| <i>Erythrocebus patas</i>           | DACH1      | 9219  | 9219  | 1  |
| <i>Erythrocebus patas</i>           | DCTN2      | 31429 | 31430 | 2  |
| <i>Eulemur fulvus</i>               | APP        | 2683  | 2683  | 1  |
| <i>Eulemur macaco</i>               | LRPPRC_169 | 14244 | 14244 | 1  |
| <i>Eulemur macaco</i>               | MBD5       | 17048 | 17048 | 1  |
| <i>Eulemur mongoz</i>               | SMCY       | 24009 | 24010 | 2  |
| <i>Eulemur rubiventer</i>           | SMCY       | 24331 | 24332 | 2  |
| <i>Galago thomasi</i>               | PLCB4      | 19494 | 19498 | 5  |
| <i>Galago thomasi</i>               | RAB6IP1    | 33997 | 34017 | 21 |
| <i>Galeopterus variegatus</i>       | DACH1      | 9232  | 9234  | 3  |
| <i>Galeopterus variegatus</i>       | DCTN2      | 31405 | 31408 | 4  |
| <i>Galeopterus variegatus</i>       | RAB6IP1    | 33911 | 33925 | 15 |
| <i>Gorilla gorilla</i>              | APP        | 2562  | 2562  | 1  |
| <i>Gorilla gorilla</i>              | LRPPRC_169 | 14465 | 14468 | 4  |
| <i>Gorilla gorilla</i>              | USH2A      | 26957 | 26957 | 1  |
| <i>Homo sapiens</i>                 | NEGR1      | 17552 | 17554 | 3  |
| <i>Hylobates agilis</i>             | ATXN7      | 30040 | 30040 | 1  |
| <i>Lemur catta</i>                  | LRPPRC_169 | 14294 | 14294 | 1  |
| <i>Lemur catta</i>                  | FES        | 11946 | 11947 | 2  |
| <i>Lemur catta</i>                  | LRPPRC_169 | 14260 | 14263 | 4  |
| <i>Lemur catta</i>                  | SMCY       | 23764 | 23773 | 10 |
| <i>Lemur catta</i>                  | ZFX        | 27661 | 27661 | 1  |
| <i>Lemur catta</i>                  | DCTN2      | 31288 | 31290 | 3  |

Table S5. Synapomorphic and autapomorphic indels listed by branch node in Figure 2.

|                                 |            |       |       |    |
|---------------------------------|------------|-------|-------|----|
| <i>Lepilemur jamesi</i>         | RAB6IP1    | 33688 | 33689 | 2  |
| <i>Lepilemur ruficaudatus</i>   | RPGRIP1    | 21852 | 21854 | 3  |
| <i>Lepilemur ruficaudatus</i>   | SMCY       | 23893 | 23898 | 6  |
| <i>Lepilemur ruficaudatus</i>   | SMCY       | 24322 | 24326 | 5  |
| <i>Loris tardigradus</i>        | CFTR       | 6730  | 6731  | 2  |
| <i>Loris tardigradus</i>        | NPAS3.2    | 18913 | 18916 | 4  |
| <i>Loris tardigradus</i>        | USH2A      | 26605 | 26608 | 4  |
| <i>Loris tardigradus</i>        | ZFX        | 27591 | 27595 | 5  |
| <i>Loris tardigradus</i>        | ERC2       | 34341 | 34341 | 1  |
| <i>Loris tardigradus</i>        | ERC2       | 34664 | 34666 | 3  |
| <i>Macaca arctoides</i>         | DACH1      | 9426  | 9436  | 11 |
| <i>Macaca cyclopis</i>          | SRY        | 24848 | 24853 | 6  |
| <i>Macaca maura</i>             | BRCA2      | 6239  | 6250  | 12 |
| <i>Macaca sylvanus</i>          | LRPPRC_169 | 14467 | 14467 | 1  |
| <i>Mico argentata</i>           | LUC7L      | 16100 | 16104 | 5  |
| <i>Miopithecus ogouensis</i>    | LRPPRC_171 | 15210 | 15219 | 10 |
| <i>Miopithecus ogouensis</i>    | LUC7L      | 15812 | 15815 | 4  |
| <i>Miopithecus ogouensis</i>    | ZFX        | 27701 | 27712 | 12 |
| <i>Mirza zaza</i>               | ABCA1      | 360   | 360   | 1  |
| <i>Mirza zaza</i>               | DMRT1      | 9707  | 9710  | 4  |
| <i>Mirza zaza</i>               | ATXN7      | 29960 | 29960 | 1  |
| <i>Nasalis larvatus</i>         | ZFX        | 28124 | 28129 | 6  |
| <i>Nycticebus pygmaeus</i>      | ATXN7      | 30178 | 30178 | 1  |
| <i>Nycticebus pygmaeus</i>      | RAB6IP1    | 33848 | 33849 | 2  |
| <i>Pan paniscus</i>             | SMCY       | 24334 | 24337 | 4  |
| <i>Pan troglodytes verus</i>    | NPAS3.2    | 18660 | 18660 | 1  |
| <i>Papio hamadryas</i>          | PLCB4      | 19513 | 19513 | 1  |
| <i>Perodicticus potto</i>       | DACH1      | 9439  | 9446  | 8  |
| <i>Perodicticus potto</i>       | LUC7L      | 15713 | 15717 | 5  |
| <i>Perodicticus potto</i>       | DCTN2      | 31606 | 31607 | 2  |
| <i>Pithecia irrorata</i>        | ZFX        | 27610 | 27612 | 3  |
| <i>Pithecia pithecia</i>        | APP        | 2296  | 2296  | 1  |
| <i>Pithecia pithecia</i>        | NPAS3      | 18190 | 18190 | 1  |
| <i>Pongo pygmaeus</i>           | DMRT1      | 9722  | 9732  | 11 |
| <i>Pongo pygmaeus</i>           | ERC2       | 34453 | 34455 | 3  |
| <i>Propithecus diadema</i>      | POLA1      | 33290 | 33290 | 1  |
| <i>Propithecus edwardsi</i>     | NPAS3      | 18219 | 18225 | 7  |
| <i>Rhinopithecus brelichi</i>   | ERC2       | 34333 | 34336 | 4  |
| <i>Saguinus fuscicollis</i>     | LUC7L      | 15781 | 15781 | 1  |
| <i>Saguinus fuscicollis</i>     | TTR        | 25876 | 25876 | 1  |
| <i>Saguinus fuscicollis</i>     | ZFX        | 27732 | 27732 | 1  |
| <i>Saguinus fuscicollis</i>     | RAB6IP1    | 33738 | 33740 | 3  |
| <i>Saguinus fuscicollis</i>     | RAB6IP1    | 33887 | 33901 | 15 |
| <i>Saguinus fuscicollis</i>     | ERC2       | 34549 | 34561 | 13 |
| <i>Saguinus mystax</i>          | CFTR       | 6710  | 6710  | 1  |
| <i>Saguinus mystax</i>          | DCTN2      | 31250 | 31254 | 5  |
| <i>Saimiri oerstedii</i>        | RAB6IP1    | 33872 | 33875 | 4  |
| <i>Saimiri orstedtii</i>        | MBD5       | 17296 | 17296 | 1  |
| <i>Symphalangus syndactylus</i> | SMCY       | 23744 | 23745 | 2  |

Table S5. Synapomorphic and autapomorphic indels listed by branch node in Figure 2.

|                                |            |       |       |    |
|--------------------------------|------------|-------|-------|----|
| <i>Tarsius banancus</i>        | TTR        | 25971 | 25972 | 2  |
| <i>Tarsius syrichta</i>        | ABCA1      | 365   | 366   | 2  |
| <i>Tarsius syrichta</i>        | FES        | 11929 | 11944 | 16 |
| <i>Tarsius syrichta</i>        | LRPPRC_171 | 14828 | 14828 | 1  |
| <i>Tarsius syrichta</i>        | TTR        | 25226 | 25228 | 3  |
| <i>Tarsius syrichta</i>        | TTR        | 25265 | 25265 | 1  |
| <i>Tarsius syrichta</i>        | TTR        | 26019 | 26019 | 1  |
| <i>Trachypithecus auratus</i>  | MBD5       | 17002 | 17003 | 2  |
| <i>Trachypithecus auratus</i>  | SGMS1      | 22370 | 22370 | 1  |
| <i>Trachypithecus obscurus</i> | FES        | 11861 | 11862 | 2  |
| <i>Trachypithecus phareii</i>  | SMCX       | 23491 | 23492 | 2  |
| <i>Trachypithecus phareii</i>  | POLA1      | 33004 | 33005 | 2  |
| <i>Tupaia glis</i>             | DACH1      | 9174  | 9175  | 2  |
| <i>Tupaia glis</i>             | FES        | 11854 | 11946 | 93 |
| <i>Tupaia glis</i>             | KCNMA1     | 13869 | 13872 | 4  |
| <i>Tupaia glis</i>             | LUC7L      | 15772 | 15774 | 3  |
| <i>Tupaia glis</i>             | LUC7L      | 15830 | 15831 | 2  |
| <i>Tupaia glis</i>             | MBD5       | 17000 | 17000 | 1  |
| <i>Tupaia minor</i>            | FES        | 11865 | 11867 | 3  |
| <i>Tupaia minor</i>            | FES        | 11896 | 11906 | 11 |
| <i>Tupaia minor</i>            | DCTN2      | 31666 | 31668 | 3  |
