# Supplementary material
Source: PubMed Central journal article supplement (PMC3060065)
Supplement: pgen.1001342.s019.pdf [file pgen.1001342.s019.pdf]

Table S6. Synapomorphic and autapomorphic indels listed by gene.

| Gene  | coordinates<br>START | coordinates<br>END | Size of indel | Node#/species                       |
|-------|----------------------|--------------------|---------------|-------------------------------------|
| ABCA1 | 420                  | 423                | 4             | 108                                 |
| ABCA1 | 451                  | 451                | 1             | 118                                 |
| ABCA1 | 279                  | 290                | 12            | 150                                 |
| ABCA1 | 378                  | 382                | 5             | 155                                 |
| ABCA1 | 34                   | 35                 | 2             | 173                                 |
| ABCA1 | 52                   | 52                 | 1             | 173                                 |
| ABCA1 | 346                  | 346                | 1             | 173                                 |
| ABCA1 | 337                  | 337                | 1             | 175                                 |
| ABCA1 | 154                  | 154                | 1             | <i>Alouatta belzebul</i>            |
| ABCA1 | 28                   | 36                 | 10            | <i>Arctocebus calabarensis</i>      |
| ABCA1 | 486                  | 486                | 1             | <i>Arctocebus calabarensis</i>      |
| ABCA1 | 501                  | 501                | 1             | <i>Arctocebus calabarensis</i>      |
| ABCA1 | 186                  | 186                | 1             | <i>Callimico goeldii</i>            |
| ABCA1 | 189                  | 191                | 3             | <i>Callimico goeldii</i>            |
| ABCA1 | 406                  | 410                | 5             | <i>Callithrix pygmaea</i>           |
| ABCA1 | 18                   | 20                 | 3             | <i>Cheirogaleus medius</i>          |
| ABCA1 | 155                  | 166                | 12            | <i>Cheirogaleus medius</i>          |
| ABCA1 | 360                  | 360                | 1             | <i>Mirza zaza</i>                   |
| ABCA1 | 365                  | 366                | 2             | <i>Tarsius syrichta</i>             |
| AFF2  | 1445                 | 1447               | 3             | 13                                  |
| AFF2  | 1028                 | 1029               | 2             | 53                                  |
| AFF2  | 1136                 | 1145               | 10            | 84                                  |
| AFF2  | 1085                 | 1085               | 1             | 108                                 |
| AFF2  | 1136                 | 1136               | 1             | 147                                 |
| AFF2  | 1120                 | 1120               | 1             | 188                                 |
| AFF2  | 1253                 | 1253               | 1             | 188                                 |
| AFF2  | 1252                 | 1253               | 2             | <i>Daubentonia madagascariensis</i> |
| APP   | 2649                 | 2649               | 1             | 98                                  |
| APP   | 2278                 | 2278               | 1             | 125                                 |
| APP   | 2342                 | 2344               | 3             | 181                                 |
| APP   | 2212                 | 2215               | 4             | 186                                 |
| APP   | 2296                 | 2298               | 3             | 186                                 |
| APP   | 2427                 | 2427               | 1             | 186                                 |
| APP   | 2684                 | 2684               | 1             | 188                                 |
| APP   | 2683                 | 2683               | 1             | <i>Eulemur fulvus</i>               |
| APP   | 2562                 | 2562               | 1             | <i>Gorilla gorilla</i>              |
| APP   | 2296                 | 2296               | 1             | <i>Pithecia pithecia</i>            |
| ATXN7 | 30044                | 30044              | 1             | 87                                  |
| ATXN7 | 30036                | 30037              | 2             | 98                                  |
| ATXN7 | 29815                | 29817              | 3             | 142                                 |
| ATXN7 | 30104                | 30127              | 24            | 148                                 |
| ATXN7 | 30167                | 30167              | 1             | 183                                 |
| ATXN7 | 30107                | 30113              | 7             | 184                                 |
| ATXN7 | 30072                | 30077              | 6             | 186                                 |
| ATXN7 | 30089                | 30091              | 3             | 186                                 |
| ATXN7 | 30043                | 30043              | 1             | 188                                 |
| ATXN7 | 30087                | 30093              | 7             | <i>Arctocebus calabarensis</i>      |

Table S6. Synapomorphic and autapomorphic indels listed by gene.

|        |       |       |    |                                     |
|--------|-------|-------|----|-------------------------------------|
| ATXN7  | 30107 | 30114 | 8  | <i>Cheirogaleus medius</i>          |
| ATXN7  | 30040 | 30040 | 1  | <i>Hylobates agilis</i>             |
| ATXN7  | 29960 | 29960 | 1  | <i>Mirza zaza</i>                   |
| ATXN7  | 30178 | 30178 | 1  | <i>Nycticebus pygmaeus</i>          |
| AXIN1  | 3588  | 3601  | 14 | 188                                 |
| AXIN1  | 3643  | 3643  | 1  | 188                                 |
| BRCA2  | 5806  | 5820  | 15 | 63                                  |
| BRCA2  | 6210  | 6212  | 3  | 70                                  |
| BRCA2  | 5311  | 5331  | 21 | 97                                  |
| BRCA2  | 5607  | 5618  | 12 | 98                                  |
| BRCA2  | 6212  | 6220  | 9  | 98                                  |
| BRCA2  | 5839  | 5841  | 3  | <i>Cheirogaleus medius</i>          |
| BRCA2  | 6239  | 6250  | 12 | <i>Macaca maura</i>                 |
| CFTR   | 6550  | 6550  | 1  | 52                                  |
| CFTR   | 6923  | 6923  | 1  | 61                                  |
| CFTR   | 6327  | 6327  | 1  | 78                                  |
| CFTR   | 6939  | 6941  | 3  | 139                                 |
| CFTR   | 6364  | 6369  | 6  | 150                                 |
| CFTR   | 6340  | 6348  | 9  | 151                                 |
| CFTR   | 6573  | 6585  | 13 | 151                                 |
| CFTR   | 6319  | 6319  | 1  | 167                                 |
| CFTR   | 6698  | 6698  | 1  | 171                                 |
| CFTR   | 7032  | 7032  | 1  | 171                                 |
| CFTR   | 6939  | 6950  | 12 | 181                                 |
| CFTR   | 6513  | 6540  | 28 | <i>Arctocebus calabarensis</i>      |
| CFTR   | 6986  | 6990  | 5  | <i>Arctocebus calabarensis</i>      |
| CFTR   | 6430  | 6430  | 1  | <i>Cercopithecus diana</i>          |
| CFTR   | 6715  | 6718  | 4  | <i>Cheirogaleus medius</i>          |
| CFTR   | 6600  | 6677  | 78 | <i>Daubentonia madagascariensis</i> |
| CFTR   | 6715  | 6719  | 5  | <i>Daubentonia madagascariensis</i> |
| CFTR   | 6730  | 6731  | 2  | <i>Loris tardigradus</i>            |
| CFTR   | 6710  | 6710  | 1  | <i>Saguinus mystax</i>              |
| CHRNA1 | 7322  | 7344  | 23 | 12                                  |
| CHRNA1 | 7153  | 7153  | 1  | 69                                  |
| CHRNA1 | 7354  | 7354  | 1  | 86                                  |
| CHRNA1 | 7259  | 7259  | 1  | 110                                 |
| CHRNA1 | 7171  | 7182  | 12 | 144                                 |
| CHRNA1 | 7224  | 7229  | 6  | 144                                 |
| CHRNA1 | 7363  | 7366  | 4  | 144                                 |
| CHRNA1 | 7196  | 7219  | 24 | 168                                 |
| CHRNA1 | 7206  | 7206  | 1  | 177                                 |
| CHRNA1 | 7096  | 7096  | 1  | 184                                 |
| CHRNA1 | 7148  | 7148  | 1  | 186                                 |
| CHRNA1 | 7336  | 7337  | 2  | 186                                 |
| CHRNA1 | 7149  | 7149  | 1  | <i>Arctocebus calabarensis</i>      |
| CHRNA1 | 7347  | 7354  | 8  | <i>Arctocebus calabarensis</i>      |
| CNR1   | 7538  | 7540  | 3  | 151                                 |
| CREM   | 8499  | 8505  | 7  | 74                                  |
| CREM   | 8569  | 8577  | 9  | 78                                  |

Table S6. Synapomorphic and autapomorphic indels listed by gene.

|       |       |       |    |                                     |
|-------|-------|-------|----|-------------------------------------|
| CREM  | 8617  | 8619  | 3  | 96                                  |
| CREM  | 8692  | 8692  | 1  | 142                                 |
| CREM  | 8476  | 8476  | 1  | 188                                 |
| CREM  | 8520  | 8522  | 3  | 188                                 |
| CREM  | 8653  | 8654  | 2  | 188                                 |
| CREM  | 8675  | 8675  | 1  | 188                                 |
| CREM  | 8658  | 8658  | 1  | <i>Callimico goeldii</i>            |
| DACH1 | 9366  | 9367  | 2  | 77                                  |
| DACH1 | 9123  | 9126  | 4  | 96                                  |
| DACH1 | 9282  | 9282  | 1  | 107                                 |
| DACH1 | 9270  | 9274  | 5  | 139                                 |
| DACH1 | 9186  | 9188  | 3  | 171                                 |
| DACH1 | 9219  | 9219  | 1  | <i>Erythrocebus patas</i>           |
| DACH1 | 9232  | 9234  | 3  | <i>Galeopterus variegatus</i>       |
| DACH1 | 9426  | 9436  | 11 | <i>Macaca arctoides</i>             |
| DACH1 | 9439  | 9446  | 8  | <i>Perodicticus potto</i>           |
| DACH1 | 9174  | 9175  | 2  | <i>Tupaia glis</i>                  |
| DCTN2 | 31471 | 31473 | 3  | 34                                  |
| DCTN2 | 31335 | 31339 | 5  | 62                                  |
| DCTN2 | 31709 | 31710 | 2  | 62                                  |
| DCTN2 | 31328 | 31329 | 2  | 77                                  |
| DCTN2 | 31560 | 31562 | 3  | 87                                  |
| DCTN2 | 31427 | 31428 | 2  | 110                                 |
| DCTN2 | 31334 | 31335 | 2  | 122                                 |
| DCTN2 | 31340 | 31341 | 2  | 142                                 |
| DCTN2 | 31663 | 31663 | 1  | 144                                 |
| DCTN2 | 31585 | 31595 | 11 | 148                                 |
| DCTN2 | 31580 | 31580 | 1  | 151                                 |
| DCTN2 | 31524 | 31528 | 5  | 176                                 |
| DCTN2 | 31337 | 31338 | 2  | 184                                 |
| DCTN2 | 31432 | 31442 | 11 | 184                                 |
| DCTN2 | 31476 | 31476 | 1  | 184                                 |
| DCTN2 | 31426 | 31426 | 1  | 186                                 |
| DCTN2 | 31572 | 31573 | 2  | 186                                 |
| DCTN2 | 31588 | 31589 | 2  | 186                                 |
| DCTN2 | 31601 | 31601 | 1  | 186                                 |
| DCTN2 | 31537 | 31539 | 3  | 188                                 |
| DCTN2 | 31668 | 31669 | 2  | 188                                 |
| DCTN2 | 31411 | 31411 | 1  | 142+186                             |
| DCTN2 | 31369 | 31370 | 2  | <i>Aotus azarae</i>                 |
| DCTN2 | 31630 | 31636 | 7  | <i>Callimico goeldii</i>            |
| DCTN2 | 31388 | 31388 | 1  | <i>Daubentonia madagascariensis</i> |
| DCTN2 | 31626 | 31628 | 3  | <i>Daubentonia madagascariensis</i> |
| DCTN2 | 31661 | 31666 | 6  | <i>Daubentonia madagascariensis</i> |
| DCTN2 | 31429 | 31430 | 2  | <i>Erythrocebus patas</i>           |
| DCTN2 | 31405 | 31408 | 4  | <i>Galeopterus variegatus</i>       |
| DCTN2 | 31288 | 31290 | 3  | <i>Lemur catta</i>                  |
| DCTN2 | 31606 | 31607 | 2  | <i>Perodicticus potto</i>           |
| DCTN2 | 31250 | 31254 | 5  | <i>Saguinus mystax</i>              |

Table S6. Synapomorphic and autapomorphic indels listed by gene.

|         |       |       |    |                                     |
|---------|-------|-------|----|-------------------------------------|
| DCTN2   | 31666 | 31668 | 3  | <i>Tupaia minor</i>                 |
| DMRT1   | 9741  | 9744  | 4  | 96                                  |
| DMRT1   | 9537  | 9542  | 6  | 98                                  |
| DMRT1   | 9788  | 9789  | 2  | 98                                  |
| DMRT1   | 9679  | 9680  | 2  | 125                                 |
| DMRT1   | 9833  | 9840  | 8  | 125                                 |
| DMRT1   | 9578  | 9581  | 4  | 142                                 |
| DMRT1   | 9743  | 9746  | 4  | 147                                 |
| DMRT1   | 9778  | 9789  | 12 | 148                                 |
| DMRT1   | 9817  | 9817  | 1  | 154                                 |
| DMRT1   | 9815  | 9815  | 1  | 184                                 |
| DMRT1   | 9600  | 9600  | 1  | 186                                 |
| DMRT1   | 9707  | 9709  | 3  | 186                                 |
| DMRT1   | 9848  | 9852  | 5  | <i>Daubentonia madagascariensis</i> |
| DMRT1   | 9707  | 9710  | 4  | <i>Mirza zaza</i>                   |
| DMRT1   | 9722  | 9732  | 11 | <i>Pongo pygmaeus</i>               |
| ERC2    | 34708 | 34710 | 3  | 4                                   |
| ERC2    | 34474 | 34479 | 6  | 23                                  |
| ERC2    | 34401 | 34403 | 3  | 60                                  |
| ERC2    | 34620 | 34622 | 3  | 106                                 |
| ERC2    | 34362 | 34362 | 1  | 125                                 |
| ERC2    | 34460 | 34460 | 1  | 135                                 |
| ERC2    | 34318 | 34321 | 4  | 144                                 |
| ERC2    | 34252 | 34252 | 1  | 151                                 |
| ERC2    | 34389 | 34393 | 5  | 175                                 |
| ERC2    | 34526 | 34526 | 1  | 178                                 |
| ERC2    | 34484 | 34489 | 6  | 181                                 |
| ERC2    | 34707 | 34709 | 3  | 184                                 |
| ERC2    | 34323 | 34323 | 1  | 186                                 |
| ERC2    | 34340 | 34341 | 2  | 186                                 |
| ERC2    | 34518 | 34535 | 18 | 186                                 |
| ERC2    | 34198 | 34204 | 7  | <i>Arctocebus calabarensis</i>      |
| ERC2    | 34593 | 34597 | 5  | <i>Cebus olivaceus</i>              |
| ERC2    | 34341 | 34341 | 1  | <i>Loris tardigradus</i>            |
| ERC2    | 34664 | 34666 | 3  | <i>Loris tardigradus</i>            |
| ERC2    | 34453 | 34455 | 3  | <i>Pongo pygmaeus</i>               |
| ERC2    | 34333 | 34336 | 4  | <i>Rhinopithecus brelichi</i>       |
| ERC2    | 34549 | 34561 | 13 | <i>Saguinus fuscicollis</i>         |
| FAM123B | 32170 | 32199 | 30 | 168                                 |
| FAM123B | 31981 | 31989 | 9  | 188                                 |
| FAM123B | 31967 | 31968 | 2  | <i>Allenopithecus nigroviridis</i>  |
| FAM123B | 32178 | 32222 | 45 | <i>Arctocebus calabarensis</i>      |
| FAM123B | 32126 | 32185 | 60 | <i>Avahi laniger</i>                |
| FES     | 11878 | 11879 | 2  | 77                                  |
| FES     | 11837 | 11839 | 3  | 78                                  |
| FES     | 11866 | 11868 | 3  | 119                                 |
| FES     | 11851 | 11851 | 1  | 142                                 |
| FES     | 12000 | 12002 | 3  | 142                                 |
| FES     | 12082 | 12082 | 1  | 142                                 |

Table S6. Synapomorphic and autapomorphic indels listed by gene.

|            |       |       |    |                                |
|------------|-------|-------|----|--------------------------------|
| FES        | 11851 | 11864 | 14 | 148                            |
| FES        | 12050 | 12058 | 8  | 149                            |
| FES        | 12069 | 12069 | 1  | 149                            |
| FES        | 11839 | 11886 | 48 | 156                            |
| FES        | 11851 | 11866 | 16 | 172                            |
| FES        | 11837 | 11837 | 1  | 188                            |
| FES        | 11979 | 11980 | 2  | 188                            |
| FES        | 12085 | 12085 | 1  | 188                            |
| FES        | 11935 | 12006 | 72 | <i>Cebus xanthosternos</i>     |
| FES        | 11946 | 11947 | 2  | <i>Lemur catta</i>             |
| FES        | 11929 | 11944 | 16 | <i>Tarsius syrichta</i>        |
| FES        | 11861 | 11862 | 2  | <i>Trachypithecus obscurus</i> |
| FES        | 11854 | 11946 | 93 | <i>Tupaia glis</i>             |
| FES        | 11865 | 11867 | 3  | <i>Tupaia minor</i>            |
| FES        | 11896 | 11906 | 11 | <i>Tupaia minor</i>            |
| FOXP1      | 12526 | 12526 | 1  | 118                            |
| FOXP1      | 12639 | 12640 | 2  | 126                            |
| FOXP1      | 12288 | 12288 | 1  | <i>Colobus guereza</i>         |
| GHR        | 13005 | 13005 | 1  | 78                             |
| GHR        | 12985 | 12987 | 3  | 96                             |
| GHR        | 12952 | 12954 | 3  | 98                             |
| GHR        | 12910 | 12912 | 3  | 107                            |
| GHR        | 12811 | 12817 | 7  | 157                            |
| GHR        | 12976 | 12978 | 3  | 170                            |
| GHR        | 12978 | 12978 | 1  | <i>Arctocebus calabarensis</i> |
| GHR        | 13217 | 13222 | 6  | <i>Arctocebus calabarensis</i> |
| KCNMA1     | 13858 | 13858 | 1  | 13                             |
| KCNMA1     | 13844 | 13844 | 1  | 113                            |
| KCNMA1     | 13527 | 13527 | 1  | 142                            |
| KCNMA1     | 13770 | 13770 | 1  | 142                            |
| KCNMA1     | 13586 | 13595 | 11 | 184                            |
| KCNMA1     | 13770 | 13775 | 6  | 186                            |
| KCNMA1     | 13522 | 13522 | 1  | 188                            |
| KCNMA1     | 13814 | 13815 | 2  | 188                            |
| KCNMA1     | 13869 | 13872 | 4  | <i>Tupaia glis</i>             |
| LRPPRC_169 | 14090 | 14175 | 86 | 13                             |
| LRPPRC_169 | 14029 | 14031 | 3  | 42                             |
| LRPPRC_169 | 14297 | 14299 | 3  | 56                             |
| LRPPRC_169 | 14260 | 14262 | 2  | 78                             |
| LRPPRC_169 | 14505 | 14508 | 4  | 157                            |
| LRPPRC_169 | 14165 | 14165 | 1  | 177                            |
| LRPPRC_169 | 14523 | 14537 | 14 | 177                            |
| LRPPRC_169 | 14460 | 14460 | 1  | <i>Callimico goeldii</i>       |
| LRPPRC_169 | 14244 | 14244 | 1  | <i>Eulemur macaco</i>          |
| LRPPRC_169 | 14465 | 14468 | 4  | <i>Gorilla gorilla</i>         |
| LRPPRC_169 | 14294 | 14294 | 1  | <i>Lemur catta</i>             |
| LRPPRC_169 | 14260 | 14263 | 4  | <i>Lemur catta</i>             |
| LRPPRC_169 | 14467 | 14467 | 1  | <i>Macaca sylvanus</i>         |
| LRPPRC_171 | 14806 | 14817 | 12 | 16                             |

Table S6. Synapomorphic and autapomorphic indels listed by gene.

|            |       |       |    |                                     |
|------------|-------|-------|----|-------------------------------------|
| LRPPRC_171 | 14958 | 14958 | 1  | 78                                  |
| LRPPRC_171 | 14997 | 15010 | 14 | 78                                  |
| LRPPRC_171 | 15183 | 15183 | 1  | 87                                  |
| LRPPRC_171 | 14934 | 14936 | 3  | 96                                  |
| LRPPRC_171 | 14874 | 14879 | 6  | 144                                 |
| LRPPRC_171 | 15022 | 15032 | 11 | 144                                 |
| LRPPRC_171 | 15001 | 15003 | 3  | 147                                 |
| LRPPRC_171 | 14830 | 14837 | 8  | 150                                 |
| LRPPRC_171 | 14928 | 14928 | 1  | 171                                 |
| LRPPRC_171 | 14807 | 14808 | 2  | 173                                 |
| LRPPRC_171 | 14840 | 14841 | 2  | 186                                 |
| LRPPRC_171 | 14847 | 14847 | 1  | 186                                 |
| LRPPRC_171 | 14973 | 14979 | 7  | 186                                 |
| LRPPRC_171 | 15093 | 15094 | 2  | 186                                 |
| LRPPRC_171 | 15210 | 15219 | 10 | <i>Miopithecus ogouensis</i>        |
| LRPPRC_171 | 14828 | 14828 | 1  | <i>Tarsius syrichta</i>             |
| LUC7L      | 15711 | 15712 | 2  | 61                                  |
| LUC7L      | 15763 | 15763 | 1  | 62                                  |
| LUC7L      | 15670 | 15671 | 2  | 78                                  |
| LUC7L      | 15651 | 15651 | 1  | 82                                  |
| LUC7L      | 15779 | 15782 | 4  | 87                                  |
| LUC7L      | 15891 | 15908 | 18 | 96                                  |
| LUC7L      | 16053 | 16053 | 1  | 125                                 |
| LUC7L      | 16095 | 16095 | 1  | 125                                 |
| LUC7L      | 15984 | 15986 | 3  | 140                                 |
| LUC7L      | 16199 | 16202 | 4  | 140                                 |
| LUC7L      | 16065 | 16068 | 4  | 167                                 |
| LUC7L      | 15778 | 15783 | 6  | 173                                 |
| LUC7L      | 16062 | 16064 | 3  | 173                                 |
| LUC7L      | 16016 | 16016 | 1  | 174                                 |
| LUC7L      | 15893 | 15893 | 1  | 177                                 |
| LUC7L      | 16074 | 16076 | 3  | 184                                 |
| LUC7L      | 15868 | 15868 | 1  | 186                                 |
| LUC7L      | 15883 | 15883 | 1  | 186                                 |
| LUC7L      | 16159 | 16159 | 1  | 186                                 |
| LUC7L      | 15651 | 15665 | 15 | 188                                 |
| LUC7L      | 15814 | 15817 | 4  | 188                                 |
| LUC7L      | 15970 | 15971 | 2  | 188                                 |
| LUC7L      | 15996 | 15996 | 1  | 188                                 |
| LUC7L      | 16062 | 16073 | 12 | 188                                 |
| LUC7L      | 16100 | 16100 | 1  | 188                                 |
| LUC7L      | 16008 | 16020 | 13 | <i>Aotus trivigatus</i>             |
| LUC7L      | 15837 | 15837 | 1  | <i>Arctocebus calabarensis</i>      |
| LUC7L      | 16139 | 16139 | 1  | <i>Arctocebus calabarensis</i>      |
| LUC7L      | 16119 | 16119 | 1  | <i>Daubentonia madagascariensis</i> |
| LUC7L      | 16100 | 16104 | 5  | <i>Mico argentata</i>               |
| LUC7L      | 15812 | 15815 | 4  | <i>Miopithecus ogouensis</i>        |
| LUC7L      | 15713 | 15717 | 5  | <i>Perodicticus potto</i>           |
| LUC7L      | 15781 | 15781 | 1  | <i>Saguinus fuscicollis</i>         |

Table S6. Synapomorphic and autapomorphic indels listed by gene.

|         |       |       |    |                                     |
|---------|-------|-------|----|-------------------------------------|
| LUC7L   | 15772 | 15774 | 3  | <i>Tupaia glis</i>                  |
| LUC7L   | 15830 | 15831 | 2  | <i>Tupaia glis</i>                  |
| MAPKAP1 | 16517 | 16519 | 3  | 31                                  |
| MAPKAP1 | 16329 | 16330 | 2  | 177                                 |
| MAPKAP1 | 16725 | 16726 | 2  | 178                                 |
| MAPKAP1 | 16353 | 16353 | 1  | 188                                 |
| MAPKAP1 | 16349 | 16349 | 1  | <i>Daubentonia madagascariensis</i> |
| MBD5    | 17031 | 17032 | 2  | 82                                  |
| MBD5    | 16953 | 16954 | 2  | 87                                  |
| MBD5    | 17105 | 17105 | 1  | 87                                  |
| MBD5    | 16989 | 16992 | 4  | 142                                 |
| MBD5    | 17039 | 17039 | 1  | 186                                 |
| MBD5    | 17090 | 17090 | 1  | 188                                 |
| MBD5    | 17045 | 17047 | 3  | <i>Avahi laniger</i>                |
| MBD5    | 17342 | 17342 | 1  | <i>Callimico goeldii (ind)</i>      |
| MBD5    | 17048 | 17048 | 1  | <i>Eulemur macaco</i>               |
| MBD5    | 17296 | 17296 | 1  | <i>Saimiri orstedtii</i>            |
| MBD5    | 17002 | 17003 | 2  | <i>Trachypithecus auratus</i>       |
| MBD5    | 17000 | 17000 | 1  | <i>Tupaia glis</i>                  |
| NEGR1   | 17622 | 17622 | 1  | 98                                  |
| NEGR1   | 17684 | 17684 | 1  | 186                                 |
| NEGR1   | 17740 | 17741 | 2  | 186                                 |
| NEGR1   | 17773 | 17773 | 1  | 188                                 |
| NEGR1   | 17552 | 17554 | 3  | <i>Homo sapiens</i>                 |
| NPAS3   | 18115 | 18115 | 1  | 74                                  |
| NPAS3   | 18178 | 18182 | 5  | 148                                 |
| NPAS3   | 18173 | 18173 | 1  | 177                                 |
| NPAS3   | 18229 | 18229 | 1  | <i>Avahi laniger</i>                |
| NPAS3   | 18190 | 18190 | 1  | <i>Pithecia pithecia</i>            |
| NPAS3   | 18219 | 18225 | 7  | <i>Propithecus edwardsi</i>         |
| NPAS3.2 | 18734 | 18740 | 7  | 22                                  |
| NPAS3.2 | 18808 | 18808 | 1  | 42                                  |
| NPAS3.2 | 18658 | 18600 | 3  | 62                                  |
| NPAS3.2 | 18898 | 18901 | 4  | 76                                  |
| NPAS3.2 | 18891 | 18891 | 1  | 97                                  |
| NPAS3.2 | 18817 | 18817 | 1  | 118                                 |
| NPAS3.2 | 18789 | 18789 | 1  | 142                                 |
| NPAS3.2 | 18744 | 18744 | 1  | 144                                 |
| NPAS3.2 | 18971 | 18983 | 13 | 148                                 |
| NPAS3.2 | 19008 | 19009 | 2  | 155                                 |
| NPAS3.2 | 19128 | 19129 | 2  | 156                                 |
| NPAS3.2 | 18961 | 18961 | 1  | 157                                 |
| NPAS3.2 | 19026 | 19026 | 1  | 157                                 |
| NPAS3.2 | 18927 | 18931 | 5  | 168                                 |
| NPAS3.2 | 19000 | 19001 | 2  | 169                                 |
| NPAS3.2 | 18910 | 18910 | 1  | 183                                 |
| NPAS3.2 | 18879 | 18880 | 2  | 184                                 |
| NPAS3.2 | 19058 | 19058 | 1  | 186                                 |
| NPAS3.2 | 19088 | 19089 | 2  | 186                                 |

Table S6. Synapomorphic and autapomorphic indels listed by gene.

|         |       |       |    |                                     |
|---------|-------|-------|----|-------------------------------------|
| NPAS3.2 | 19001 | 19005 | 5  | 188                                 |
| NPAS3.2 | 18690 | 18695 | 6  | <i>Avahi laniger</i>                |
| NPAS3.2 | 18830 | 18833 | 4  | <i>Avahi laniger</i>                |
| NPAS3.2 | 18737 | 18737 | 1  | <i>Callimico goeldii</i>            |
| NPAS3.2 | 19127 | 19128 | 2  | <i>Cheirogaleus medius</i>          |
| NPAS3.2 | 18883 | 18886 | 4  | <i>Daubentonia madagascariensis</i> |
| NPAS3.2 | 18913 | 18916 | 4  | <i>Loris tardigradus</i>            |
| NPAS3.2 | 18660 | 18660 | 1  | <i>Pan troglodytes verus</i>        |
| PLCB4   | 19405 | 19407 | 3  | 87                                  |
| PLCB4   | 19442 | 19445 | 4  | 97                                  |
| PLCB4   | 19374 | 19374 | 1  | 110                                 |
| PLCB4   | 19328 | 19328 | 1  | 113                                 |
| PLCB4   | 19330 | 19336 | 7  | 126                                 |
| PLCB4   | 19425 | 19426 | 2  | 142                                 |
| PLCB4   | 19400 | 19400 | 1  | 157                                 |
| PLCB4   | 19403 | 19403 | 1  | 177                                 |
| PLCB4   | 19341 | 19341 | 1  | 183                                 |
| PLCB4   | 19519 | 19519 | 1  | 186                                 |
| PLCB4   | 19562 | 19565 | 4  | 186                                 |
| PLCB4   | 19339 | 19339 | 1  | 144+142+186+188                     |
| PLCB4   | 19494 | 19498 | 5  | <i>Galago thomasi</i>               |
| PLCB4   | 19513 | 19513 | 1  | <i>Papio hamadryas</i>              |
| PNOC    | 32764 | 32777 | 14 | 186                                 |
| POLA1   | 33295 | 33295 | 1  | 77                                  |
| POLA1   | 32954 | 32954 | 1  | 78                                  |
| POLA1   | 32969 | 32969 | 1  | 82                                  |
| POLA1   | 33085 | 33090 | 6  | 126                                 |
| POLA1   | 33199 | 33201 | 3  | 142                                 |
| POLA1   | 33128 | 33128 | 1  | 157                                 |
| POLA1   | 33364 | 33364 | 1  | 186                                 |
| POLA1   | 32999 | 32999 | 1  | 188                                 |
| POLA1   | 33222 | 33222 | 1  | 144+142+186+188                     |
| POLA1   | 33308 | 33309 | 2  | <i>Arctocebus calabarensis</i>      |
| POLA1   | 32920 | 32931 | 12 | <i>Avahi laniger</i>                |
| POLA1   | 33133 | 33143 | 11 | <i>Callicebus moloch</i>            |
| POLA1   | 33290 | 33290 | 1  | <i>Propithecus diadema</i>          |
| POLA1   | 33004 | 33005 | 2  | <i>Trachypithecus phareii</i>       |
| RAB6IP1 | 33735 | 33738 | 4  | 75                                  |
| RAB6IP1 | 33888 | 33891 | 4  | 76                                  |
| RAB6IP1 | 33726 | 33726 | 1  | 77                                  |
| RAB6IP1 | 33624 | 33630 | 7  | 78                                  |
| RAB6IP1 | 33648 | 33649 | 2  | 78                                  |
| RAB6IP1 | 33775 | 33775 | 1  | 96                                  |
| RAB6IP1 | 33534 | 33534 | 1  | 97                                  |
| RAB6IP1 | 33677 | 33677 | 1  | 97                                  |
| RAB6IP1 | 33532 | 33535 | 4  | 98                                  |
| RAB6IP1 | 33901 | 33901 | 1  | 98                                  |
| RAB6IP1 | 33954 | 33954 | 1  | 98                                  |
| RAB6IP1 | 33648 | 33655 | 8  | 140                                 |



Table S6. Synapomorphic and autapomorphic indels listed by gene.

|         |       |       |    |                                     |
|---------|-------|-------|----|-------------------------------------|
| RAB6IP1 | 33572 | 33572 | 1  | 142                                 |
| RAB6IP1 | 33611 | 33625 | 15 | 142                                 |
| RAB6IP1 | 33674 | 33674 | 1  | 142                                 |
| RAB6IP1 | 33767 | 33767 | 1  | 142                                 |
| RAB6IP1 | 33795 | 33795 | 1  | 142                                 |
| RAB6IP1 | 33823 | 33823 | 1  | 142                                 |
| RAB6IP1 | 33867 | 33867 | 1  | 142                                 |
| RAB6IP1 | 33805 | 33806 | 2  | 148                                 |
| RAB6IP1 | 33986 | 33990 | 5  | 150                                 |
| RAB6IP1 | 33948 | 33952 | 5  | 156                                 |
| RAB6IP1 | 33689 | 33690 | 2  | 157                                 |
| RAB6IP1 | 33840 | 33840 | 1  | 173                                 |
| RAB6IP1 | 33923 | 33923 | 1  | 173                                 |
| RAB6IP1 | 33996 | 33996 | 1  | 173                                 |
| RAB6IP1 | 34077 | 34077 | 1  | 175                                 |
| RAB6IP1 | 33555 | 33556 | 2  | 176                                 |
| RAB6IP1 | 33890 | 33893 | 4  | 176                                 |
| RAB6IP1 | 33937 | 33937 | 1  | 182                                 |
| RAB6IP1 | 33543 | 33547 | 5  | 184                                 |
| RAB6IP1 | 33611 | 33611 | 1  | 184                                 |
| RAB6IP1 | 33754 | 33754 | 1  | 186                                 |
| RAB6IP1 | 33795 | 33819 | 25 | 186                                 |
| RAB6IP1 | 33842 | 33842 | 1  | 186                                 |
| RAB6IP1 | 33553 | 33556 | 4  | 188                                 |
| RAB6IP1 | 33601 | 33601 | 1  | 188                                 |
| RAB6IP1 | 33859 | 33872 | 14 | <i>Arctocebus calabarensis</i>      |
| RAB6IP1 | 33947 | 33969 | 23 | <i>Avahi laniger</i>                |
| RAB6IP1 | 33862 | 33869 | 8  | <i>Daubentonia madagascariensis</i> |
| RAB6IP1 | 34021 | 34030 | 10 | <i>Daubentonia madagascariensis</i> |
| RAB6IP1 | 33997 | 34017 | 21 | <i>Galago thomasi</i>               |
| RAB6IP1 | 33911 | 33925 | 15 | <i>Galeopterus variegatus</i>       |
| RAB6IP1 | 33688 | 33689 | 2  | <i>Lepilemur jamesi</i>             |
| RAB6IP1 | 33848 | 33849 | 2  | <i>Nycticebus pygmaeus</i>          |
| RAB6IP1 | 33738 | 33740 | 3  | <i>Saguinus fuscicollis</i>         |
| RAB6IP1 | 33887 | 33901 | 15 | <i>Saguinus fuscicollis</i>         |
| RAB6IP1 | 33872 | 33875 | 4  | <i>Saimiri oerstedii</i>            |
| RPGRIP1 | 21853 | 21877 | 25 | 69                                  |
| RPGRIP1 | 21886 | 21886 | 1  | 76                                  |
| RPGRIP1 | 21843 | 21843 | 1  | 87                                  |
| RPGRIP1 | 21869 | 21876 | 8  | 107                                 |
| RPGRIP1 | 21836 | 21837 | 2  | 148                                 |
| RPGRIP1 | 21870 | 21870 | 1  | 157                                 |
| RPGRIP1 | 21371 | 21373 | 3  | 182                                 |
| RPGRIP1 | 21843 | 21845 | 3  | 188                                 |
| RPGRIP1 | 21852 | 21854 | 3  | <i>Lepilemur ruficaudatus</i>       |
| SGMS1   | 22432 | 22432 | 1  | 142                                 |
| SGMS1   | 22267 | 22267 | 1  | 146                                 |
| SGMS1   | 22302 | 22308 | 7  | 157                                 |
| SGMS1   | 22479 | 22480 | 2  | 186                                 |

Table S6. Synapomorphic and autapomorphic indels listed by gene.

|       |       |       |    |                                     |
|-------|-------|-------|----|-------------------------------------|
| SGMS1 | 22308 | 22308 | 1  | 188                                 |
| SGMS1 | 22425 | 22426 | 2  | 188                                 |
| SGMS1 | 22370 | 22370 | 1  | <i>Trachypithecus auratus</i>       |
| SIM1  | 23263 | 23263 | 1  | 111                                 |
| SMCX  | 23490 | 23492 | 3  | 74                                  |
| SMCX  | 23441 | 23450 | 10 | 97                                  |
| SMCX  | 23479 | 23488 | 10 | 144                                 |
| SMCX  | 23465 | 23465 | 1  | 168                                 |
| SMCX  | 23513 | 23516 | 4  | 184                                 |
| SMCX  | 23493 | 23493 | 1  | 186                                 |
| SMCX  | 23424 | 23449 | 26 | 188                                 |
| SMCX  | 23491 | 23492 | 2  | <i>Trachypithecus phareii</i>       |
| SMCY  | 24112 | 24113 | 2  | 63                                  |
| SMCY  | 24334 | 24334 | 1  | 63                                  |
| SMCY  | 24103 | 24106 | 4  | 70                                  |
| SMCY  | 24398 | 24400 | 3  | 72                                  |
| SMCY  | 24322 | 24334 | 13 | 78                                  |
| SMCY  | 24082 | 24083 | 2  | 87                                  |
| SMCY  | 23870 | 23882 | 13 | 118                                 |
| SMCY  | 23916 | 23917 | 2  | 118                                 |
| SMCY  | 24187 | 24187 | 1  | 118                                 |
| SMCY  | 24028 | 24028 | 1  | 135                                 |
| SMCY  | 23777 | 23781 | 5  | 156                                 |
| SMCY  | 23685 | 23685 | 1  | 167                                 |
| SMCY  | 24435 | 24437 | 3  | 167                                 |
| SMCY  | 24020 | 24026 | 7  | 171                                 |
| SMCY  | 24458 | 24461 | 4  | <i>Callimico goeldii</i>            |
| SMCY  | 23946 | 23953 | 8  | <i>Daubentonia madagascariensis</i> |
| SMCY  | 24457 | 24461 | 5  | <i>Daubentonia madagascariensis</i> |
| SMCY  | 24009 | 24010 | 2  | <i>Eulemur mongoz</i>               |
| SMCY  | 24331 | 24332 | 2  | <i>Eulemur rubiventer</i>           |
| SMCY  | 23764 | 23773 | 10 | <i>Lemur catta</i>                  |
| SMCY  | 23893 | 23898 | 6  | <i>Lepilemur ruficaudatus</i>       |
| SMCY  | 24322 | 24326 | 5  | <i>Lepilemur ruficaudatus</i>       |
| SMCY  | 24334 | 24337 | 4  | <i>Pan paniscus</i>                 |
| SMCY  | 23744 | 23745 | 2  | <i>Symphalangus syndactylus</i>     |
| SRY   | 24849 | 24851 | 3  | 24                                  |
| SRY   | 24908 | 24913 | 6  | 42                                  |
| SRY   | 24913 | 24927 | 15 | 137                                 |
| SRY   | 24848 | 24853 | 6  | <i>Macaca cyclopis</i>              |
| TTR   | 25611 | 25611 | 1  | 23                                  |
| TTR   | 25971 | 25971 | 1  | 60                                  |
| TTR   | 25657 | 25657 | 1  | 62                                  |
| TTR   | 25753 | 25753 | 1  | 62                                  |
| TTR   | 25836 | 25836 | 1  | 72                                  |
| TTR   | 25926 | 25927 | 2  | 87                                  |
| TTR   | 25300 | 25317 | 18 | 98                                  |
| TTR   | 25752 | 25756 | 5  | 98                                  |
| TTR   | 25520 | 25520 | 1  | 103                                 |

Table S6. Synapomorphic and autapomorphic indels listed by gene.

|       |       |       |     |                                |
|-------|-------|-------|-----|--------------------------------|
| TTR   | 25469 | 25469 | 1   | 104                            |
| TTR   | 25472 | 25474 | 3   | 110                            |
| TTR   | 25997 | 25997 | 1   | 120                            |
| TTR   | 25833 | 25833 | 1   | 122                            |
| TTR   | 25931 | 25932 | 2   | 123                            |
| TTR   | 25792 | 25792 | 1   | 126                            |
| TTR   | 25601 | 25601 | 1   | 136                            |
| TTR   | 25331 | 25331 | 1   | 142                            |
| TTR   | 25262 | 25263 | 2   | 188                            |
| TTR   | 25534 | 25543 | 10  | <i>Alouatta caraya</i>         |
| TTR   | 25736 | 25737 | 2   | <i>Callimico goeldii</i>       |
| TTR   | 25304 | 25308 | 5   | <i>Cercopithecus neglectus</i> |
| TTR   | 25876 | 25876 | 1   | <i>Saguinus fuscicollis</i>    |
| TTR   | 25971 | 25972 | 2   | <i>Tarsius banancus</i>        |
| TTR   | 25226 | 25228 | 3   | <i>Tarsius syrichta</i>        |
| TTR   | 25265 | 25265 | 1   | <i>Tarsius syrichta</i>        |
| TTR   | 26019 | 26019 | 1   | <i>Tarsius syrichta</i>        |
| USH2A | 26634 | 26634 | 1   | 85                             |
| USH2A | 27036 | 27036 | 1   | 142                            |
| USH2A | 27073 | 27073 | 1   | 142                            |
| USH2A | 27044 | 27044 | 1   | 186                            |
| USH2A | 26957 | 26957 | 1   | <i>Gorilla gorilla</i>         |
| USH2A | 26605 | 26608 | 4   | <i>Loris tardigradus</i>       |
| UTY   | 27440 | 27445 | 6   | 141                            |
| ZFX   | 27600 | 27617 | 18  | 24                             |
| ZFX   | 27752 | 27753 | 2   | 34                             |
| ZFX   | 27640 | 27649 | 10  | 35                             |
| ZFX   | 27598 | 27600 | 3   | 53                             |
| ZFX   | 27881 | 27881 | 1   | 56                             |
| ZFX   | 28089 | 28092 | 4   | 56                             |
| ZFX   | 27624 | 27627 | 4   | 62                             |
| ZFX   | 28282 | 28292 | 11  | 65                             |
| ZFX   | 27575 | 27575 | 1   | 78                             |
| ZFX   | 27793 | 27794 | 2   | 78                             |
| ZFX   | 27924 | 27928 | 5   | 78                             |
| ZFX   | 28161 | 28162 | 2   | 94                             |
| ZFX   | 27695 | 27696 | 2   | 97                             |
| ZFX   | 27695 | 27695 | 1   | 110                            |
| ZFX   | 27711 | 27713 | 3   | 122                            |
| ZFX   | 27635 | 27636 | 2   | 138                            |
| ZFX   | 27699 | 27704 | 6   | 140                            |
| ZFX   | 27593 | 27595 | 3   | 176                            |
| ZFX   | 27730 | 28041 | 312 | 144+142                        |
| ZFX   | 27821 | 27827 | 7   | <i>Cercocebus torquatus</i>    |
| ZFX   | 27661 | 27661 | 1   | <i>Lemur catta</i>             |
| ZFX   | 27591 | 27595 | 5   | <i>Loris tardigradus</i>       |
| ZFX   | 27701 | 27712 | 12  | <i>Miopithecus oguensis</i>    |
| ZFX   | 28124 | 28129 | 6   | <i>Nasalis larvatus</i>        |
| ZFX   | 27610 | 27612 | 3   | <i>Pithecia irrorata</i>       |

Table S6. Synapomorphic and autapomorphic indels listed by gene.

|      |       |       |    |                             |
|------|-------|-------|----|-----------------------------|
| ZFX  | 27732 | 27732 | 1  | <i>Saguinus fuscicollis</i> |
| ZFY  | 28524 | 28525 | 2  | 27                          |
| ZFY  | 28544 | 28544 | 1  | 42                          |
| ZFY  | 28618 | 28626 | 9  | 53                          |
| ZFY  | 28709 | 28713 | 5  | 62                          |
| ZFY  | 28448 | 28451 | 4  | 78                          |
| ZFY  | 28522 | 28525 | 4  | 78                          |
| ZFY  | 28667 | 28675 | 9  | 78                          |
| ZFY  | 28606 | 28625 | 20 | 98                          |
| ZFY  | 28657 | 28657 | 1  | 98                          |
| ZFY  | 28442 | 28444 | 3  | <i>Colobus angolensis</i>   |
| ZIC3 | 29467 | 29467 | 1  | 63                          |
| ZIC3 | 29474 | 29475 | 2  | 70                          |
| ZIC3 | 29491 | 29491 | 1  | 86                          |
| ZIC3 | 29318 | 29335 | 18 | 87                          |
| ZIC3 | 29599 | 29600 | 2  | 142                         |
| ZIC3 | 29340 | 29341 | 2  | 148                         |
| ZIC3 | 29496 | 29496 | 1  | 184                         |
| ZIC3 | 29385 | 29386 | 2  | 188                         |
| ZIC3 | 29441 | 29441 | 1  | 188                         |
| ZIC3 | 29468 | 29468 | 1  | 188                         |
