# Supplementary material
Source: PubMed Central journal article supplement (PMC3060065)
Supplement: pgen.1001342.s020.pdf [file pgen.1001342.s020.pdf]

Table S7. Genome rates, branch lengths, and indels for Strepsirrhini species and Tarsiiformes.

| SPECIES                               | INFRAORDER     | FAMILY         | SUBFAMILY      | GENUS        | Substitution      | Rate 95% HPD- | Rate 95% HPD- | Branch Length<br>(ML) | Branch Length<br>(MP) | Number of<br>indels per<br>branch |
|---------------------------------------|----------------|----------------|----------------|--------------|-------------------|---------------|---------------|-----------------------|-----------------------|-----------------------------------|
|                                       |                |                |                |              | rate <sup>1</sup> | L             | H             |                       |                       |                                   |
| TBA 1 Tarsius bancanus                | Tarsiiformes   | Tarsiidae      |                | Tarsius      | 8.77              | 7.24          | 10.31         | 59.65                 | 108                   | 1                                 |
| TSY 1 Tarsius syrichta                | Tarsiiformes   | Tarsiidae      |                | Tarsius      | not done          | not done      | not done      | 76.95                 | 135                   | 6                                 |
| LAN 1 Lepilemur ankaranensis          | Lemuriformes   | Lepilemuridae  |                | Lepilemur    | 5.28              | 2.18          | 9.28          | 9.13                  | 20                    | 0                                 |
| LSP 1 Lepilemur septentrionalis       | Lemuriformes   | Lepilemuridae  |                | Lepilemur    | 6.25              | 2.41          | 10.81         | 11.24                 | 21                    | 0                                 |
| LDO 1 Lepilemur dorsalis              | Lemuriformes   | Lepilemuridae  |                | Lepilemur    | 7.54              | 3.76          | 12.23         | 21.88                 | 52                    | 0                                 |
| LER 1 Lepilemur ruficaudatus          | Lemuriformes   | Lepilemuridae  |                | Lepilemur    | 5.50              | 2.83          | 8.44          | 39.72                 | 99                    | 3                                 |
| LJA 1 Lepilemur jamesi                | Lemuriformes   | Lepilemuridae  |                | Lepilemur    | 6.29              | 3.31          | 9.56          | 72.26                 | 149                   | 1                                 |
| CMI 3 Microcebus murinus subspecies 2 | Lemuriformes   | Cheirogaleidae |                | Microcebus   | 8.25              | 3.34          | 14.23         | 16.99                 | 29                    | 1                                 |
| MMR 2 Microcebus murinus subspecies 1 | Lemuriformes   | Cheirogaleidae |                | Microcebus   | 4.28              | 1.66          | 7.40          | 7.34                  | 15                    | 0                                 |
| MCE 1 Mirza zaza                      | Lemuriformes   | Cheirogaleidae |                | Mirza        | 10.72             | 5.70          | 16.65         | 151.97                | 265                   | 4                                 |
| CMD 1 Cheirogaleus medius             | Lemuriformes   | Cheirogaleidae |                | Cheirogaleus | 5.18              | 3.26          | 7.63          | 131.71                | 297                   | 6                                 |
| PVC 2 Propithecus verreauxi coquereli | Lemuriformes   | Indriidae      |                | Propithecus  | 4.56              | 1.61          | 7.83          | 10.55                 | 18                    | 0                                 |
| PVE 1 Propithecus verreauxi           | Lemuriformes   | Indriidae      |                | Propithecus  | 8.75              | 3.36          | 14.72         | 20.38                 | 42                    | 6                                 |
| PTA 1 Propithecus tattersalli         | Lemuriformes   | Indriidae      |                | Propithecus  | 5.92              | 2.53          | 9.70          | 18.80                 | 46                    | 0                                 |
| PDI 2 Propithecus diadema             | Lemuriformes   | Indriidae      |                | Propithecus  | 5.85              | 2.07          | 10.18         | 13.75                 | 29                    | 1                                 |
| PED 1 Propithecus edwardsi            | Lemuriformes   | Indriidae      |                | Propithecus  | 6.06              | 2.16          | 10.70         | 13.97                 | 31                    | 1                                 |
| ALN 1 Avahi laniger                   | Lemuriformes   | Indriidae      |                | Avahi        | 7.54              | 4.30          | 11.53         | 129.65                | 270                   | 7                                 |
| ERF 1 Eulemur rufus                   | Lemuriformes   | Lemuridae      |                | Eulemur      | 6.01              | 2.24          | 10.48         | 7.98                  | 16                    | 0                                 |
| EFL 15 Eulemur collaris               | Lemuriformes   | Lemuridae      |                | Eulemur      | 7.99              | 3.32          | 13.57         | 10.61                 | 17                    | 0                                 |
| EFL 4 Eulemur fulvus                  | Lemuriformes   | Lemuridae      |                | Eulemur      | 4.64              | 2.04          | 7.86          | 8.69                  | 12                    | 0                                 |
| EFL 7 Eulemur albifrons               | Lemuriformes   | Lemuridae      |                | Eulemur      | 4.38              | 1.64          | 7.87          | 4.92                  | 9                     | 1                                 |
| EFL 16 Eulemur sanfordi               | Lemuriformes   | Lemuridae      |                | Eulemur      | 7.26              | 2.58          | 12.65         | 10.20                 | 12                    | 0                                 |
| EMO 1 Eulemur mongoz                  | Lemuriformes   | Lemuridae      |                | Eulemur      | 6.02              | 3.21          | 9.23          | 28.46                 | 69                    | 1                                 |
| EMC 1 Eulemur macaco                  | Lemuriformes   | Lemuridae      |                | Eulemur      | 8.72              | 3.15          | 15.22         | 11.89                 | 11                    | 2                                 |
| EMC 5 Eulemur macaco flavifrons       | Lemuriformes   | Lemuridae      |                | Eulemur      | 4.07              | 1.37          | 7.37          | 3.84                  | 7                     | 0                                 |
| ECR 2 Eulemur coronatus               | Lemuriformes   | Lemuridae      |                | Eulemur      | 6.27              | 3.24          | 10.02         | 31.33                 | 74                    | 0                                 |
| ERB 4 Eulemur rubriventer             | Lemuriformes   | Lemuridae      |                | Eulemur      | 5.81              | 3.18          | 8.90          | 47.05                 | 108                   | 0                                 |
| HGR 1 Hapalemur griseus               | Lemuriformes   | Lemuridae      |                | Hapalemur    | 2.14              | 1.15          | 3.15          | 3.95                  | 9                     | 0                                 |
| HOC 1 Hapalemur occidentalis          | Lemuriformes   | Lemuridae      |                | Hapalemur    | 17.74             | 10.84         | 25.18         | 70.72                 | 146                   | 0                                 |
| LCT 10 Lemur catta                    | Lemuriformes   | Lemuridae      |                | Lemur        | 5.15              | 3.00          | 7.49          | 48.75                 | 118                   | 6                                 |
| VVA 2 Varecia variegata variegata     | Lemuriformes   | Lemuridae      |                | Varecia      | 5.63              | 1.84          | 10.27         | 7.88                  | 14                    | 0                                 |
| VVA 7 Varecia variegata rubra         | Lemuriformes   | Lemuridae      |                | Varecia      | 5.83              | 1.74          | 10.36         | 8.20                  | 15                    | 0                                 |
| DMD 5 Daubentonia madagascariensis    | Chiromyiformes | Daubentonidae  |                | Daubentonia  | 4.29              | 2.90          | 6.09          | 257.49                | 391                   | 14                                |
| NBE 1 Nycticebus bengalensis          | Lorisiformes   | Loridae        | Lorinae        | Nycticebus   | 6.38              | 2.00          | 11.72         | 7.01                  | 13                    | 0                                 |
| NCO 2 Nycticebus coucang              | Lorisiformes   | Loridae        | Lorinae        | Nycticebus   | 4.88              | 1.47          | 8.93          | 4.90                  | 12                    | 0                                 |
| NPY 1 Nycticebus pygmaeus             | Lorisiformes   | Loridae        | Lorinae        | Nycticebus   | 11.88             | 6.36          | 18.17         | 122.06                | 266                   | 2                                 |
| LTA 2 Loris tardigradus               | Lorisiformes   | Loridae        | Lorinae        | Loris        | 6.82              | 4.68          | 9.43          | 149.80                | 300                   | 6                                 |
| ACL 1 Arctocebus calabarensis         | Lorisiformes   | Loridae        | Perodicticinae | Arctocebus   | 9.14              | 5.55          | 13.40         | 184.26                | 335                   | 16                                |
| PEP 2 Perodicticus potto              | Lorisiformes   | Loridae        | Perodicticinae | Perodicticus | 6.39              | 3.93          | 9.39          | 131.56                | 239                   | 3                                 |
| GGR 2 Otolemur garnettii              | Lorisiformes   | Galagidae      |                | Otolemur     | 9.43              | 4.32          | 15.32         | 82.76                 | 156                   | 0                                 |
| OCR 1 Otolemur crassicaudatus         | Lorisiformes   | Galagidae      |                | Otolemur     | 4.79              | 2.06          | 7.78          | 42.57                 | 68                    | 0                                 |
| GMO 4 Galago moholi                   | Lorisiformes   | Galagidae      |                | Galago       | 5.93              | 1.72          | 10.97         | 4.30                  | 7                     | 0                                 |
| GSE 1 Galago senegalensis             | Lorisiformes   | Galagidae      |                | Galago       | 5.95              | 1.72          | 11.08         | 4.14                  | 7                     | 0                                 |
| GTH 1 Galago thomasi                  | Lorisiformes   | Galagidae      |                | Galago       | 5.89              | 3.73          | 8.38          | 121.95                | 152                   | 2                                 |
