# Supplementary material
Source: PubMed Central journal article supplement (PMC3060065)
Supplement: pgen.1001342.s021.pdf [file pgen.1001342.s021.pdf]

Table S8. Genome rate, branch length and indels within Platyrrhini species.

| SPECIES                            | FAMILY   | SUBFAMILY      | GENUS          | Substitution      | Rate 95% HPD- | Rate 95% HPD- | Branch Length | Branch Length | Number of indels per branch |
|------------------------------------|----------|----------------|----------------|-------------------|---------------|---------------|---------------|---------------|-----------------------------|
|                                    |          |                |                | rate <sup>1</sup> | L             | H             | (ML)          | (MP)          |                             |
| ACA 3 Alouatta caraya              | Atelidae | Alouattinae    | Alouatta       | 6.62              | 3.60          | 10.45         | 27.01         | 52            | 1                           |
| ASA 1 Alouatta sara                | Atelidae | Alouattinae    | Alouatta       | 4.78              | 2.56          | 7.51          | 19.79         | 46            | 0                           |
| ABE 1 Alouatta belzebul            | Atelidae | Alouattinae    | Alouatta       | 17.18             | 9.94          | 25.31         | 84.05         | 217           | 1                           |
| APL 1 Alouatta palliata            | Atelidae | Alouattinae    | Alouatta       | 5.38              | 3.23          | 7.91          | 31.54         | 88            | 0                           |
| ABZ 1 Ateles belzebuth             | Atelidae | Atelinae       | Ateles         | 7.54              | 2.95          | 12.34         | 13.09         | 40            | 0                           |
| AGO 2 Ateles geoffroyi             | Atelidae | Atelinae       | Ateles         | 12.49             | 5.19          | 20.40         | 22.87         | 66            | 0                           |
| AHY 1 Ateles hybridus              | Atelidae | Atelinae       | Ateles         | 9.70              | 4.69          | 15.00         | 26.04         | 61            | 0                           |
| AFC 7 Ateles fusciceps             | Atelidae | Atelinae       | Ateles         | 2.99              | 1.45          | 4.75          | 8.72          | 24            | 0                           |
| ACM 1 Ateles chamek                | Atelidae | Atelinae       | Ateles         | 6.38              | 2.00          | 11.64         | 7.88          | 22            | 0                           |
| APC 1 Ateles paniscus              | Atelidae | Atelinae       | Ateles         | 4.97              | 1.51          | 9.14          | 5.89          | 14            | 0                           |
| BHY 1 Brachyteles hypoxanthus      | Atelidae | Atelinae       | Brachyteles    | 9.52              | 3.76          | 16.28         | 25.82         | 44            | 0                           |
| BAR 1 Brachyteles arachnoides      | Atelidae | Atelinae       | Brachyteles    | 5.02              | 1.92          | 8.7           | 12.82         | 25            | 0                           |
| LAC 2 Lagothrix cana               | Atelidae | Atelinae       | Lagothrix      | 4.22              | 1.19          | 8.05          | 1.64          | 4             | 0                           |
| LLG 1 Lagothrix lagotricha         | Atelidae | Atelinae       | Lagothrix      | 9.08              | 2.97          | 17.18         | 5.43          | 14            | 0                           |
| AZB 1 Aotus azarae boliviensis     | Cebidae  | Aotinae        | Aotus          | 5.23              | 1.76          | 9.39          | 4.03          | 7             | 0                           |
| AZI 1 Aotus azarae infulatus       | Cebidae  | Aotinae        | Aotus          | 14.92             | 6.12          | 24.81         | 14.40         | 21            | 0                           |
| AZA 1 Aotus azarae                 | Cebidae  | Aotinae        | Aotus          | 2.91              | 1.24          | 4.95          | 4.85          | 10            | 1                           |
| ANA 1 Aotus nancymae               | Cebidae  | Aotinae        | Aotus          | 2.46              | 1.26          | 3.85          | 8.40          | 22            | 0                           |
| ALM 1 Aotus lemurinus griseimembra | Cebidae  | Aotinae        | Aotus          | 5.31              | 2.01          | 9.71          | 13.22         | 37            | 0                           |
| ATR 1 Aotus trivirgatus            | Cebidae  | Aotinae        | Aotus          | 6.35              | 2.62          | 11.56         | 16.21         | 43            | 1                           |
| CGO 1 Callimico goeldii            | Cebidae  | Callitrichinae | Callimico      | 8.14              | 5.45          | 10.74         | 86.62         | 246           | 9                           |
| CJA 1 Callithrix jacchus           | Cebidae  | Callitrichinae | Callithrix     | 6.33              | 2.16          | 12.21         | 4.34          | 12            | 1                           |
| CPE 10 Callithrix penicillata      | Cebidae  | Callitrichinae | Callithrix     | 5.89              | 1.98          | 11.09         | 3.95          | 10            | 0                           |
| CKU 1 Callithrix kuhlii            | Cebidae  | Callitrichinae | Callithrix     | 11.83             | 4.57          | 20.59         | 15.83         | 32            | 0                           |
| CGE 4 Callithrix geoffroyi         | Cebidae  | Callitrichinae | Callithrix     | 3.75              | 1.40          | 6.62          | 4.66          | 12            | 0                           |
| CAI 1 Callithrix aurita            | Cebidae  | Callitrichinae | Callithrix     | 9.49              | 4.58          | 14.70         | 35.79         | 66            | 0                           |
| CPY 5 Cebuella pygmaea             | Cebidae  | Callitrichinae | Cebuella       | 6.97              | 3.79          | 10.58         | 32.83         | 88            | 1                           |
| LCH 1 Leontopithecus chrysomelas   | Cebidae  | Callitrichinae | Leontopithecus | 6.12              | 1.45          | 12.35         | 2.38          | 6             | 0                           |
| LRO 244 Leontopithecus rosalia     | Cebidae  | Callitrichinae | Leontopithecus | 6.75              | 1.92          | 13.41         | 2.83          | 7             | 0                           |
| CAR 1 Mico argentata               | Cebidae  | Callitrichinae | Mico           | 5.21              | 1.89          | 9.17          | 9.96          | 17            | 1                           |
| MHU 1 Mico humeralifer             | Cebidae  | Callitrichinae | Mico           | 12.14             | 4.80          | 21.09         | 25.08         | 47            | 1                           |
| SBI 1 Saguinus bicolor             | Cebidae  | Callitrichinae | Saguinus       | 4.51              | 1.51          | 8.12          | 4.38          | 5             | 0                           |
| SSI 1 Saguinus martinsi            | Cebidae  | Callitrichinae | Saguinus       | 12.68             | 4.48          | 21.98         | 16.91         | 25            | 0                           |
| SMD 1 Saguinus midas               | Cebidae  | Callitrichinae | Saguinus       | 5.08              | 2.26          | 8.27          | 13.55         | 29            | 0                           |
| SGE 3 Saguinus geoffroyi           | Cebidae  | Callitrichinae | Saguinus       | 3.35              | 1.09          | 6.62          | 0.42          | 1             | 0                           |
| SOE 3 Saguinus oedipus             | Cebidae  | Callitrichinae | Saguinus       | 12.28             | 3.43          | 22.71         | 4.86          | 10            | 0                           |
| SLA 1 Saguinus labiatus            | Cebidae  | Callitrichinae | Saguinus       | 4.78              | 1.69          | 8.60          | 4.14          | 13            | 0                           |
| SMY 3 Saguinus mystax              | Cebidae  | Callitrichinae | Saguinus       | 5.18              | 1.62          | 9.89          | 7.59          | 18            | 2                           |
| SIM 2 Saguinus imperator           | Cebidae  | Callitrichinae | Saguinus       | 7.62              | 3.45          | 12.31         | 27.35         | 49            | 0                           |
| SFU 6 Saguinus fuscicollis         | Cebidae  | Callitrichinae | Saguinus       | 6.15              | 4.02          | 8.38          | 52.11         | 147           | 6                           |
| CRO 1 Cebus robustus               | Cebidae  | Cebinae        | Cebus          | 12.50             | 5.01          | 21.98         | 18.67         | 34            | 0                           |

Table S8. Genome rate, branch length and indels within Platyrrhini species.

| SPECIES                                      | FAMILY      | SUBFAMILY    | GENUS             | Substitution      | Rate 95% HPD- | Rate 95% HPD- | Branch Length | Branch Length | Number of indels per branch |
|----------------------------------------------|-------------|--------------|-------------------|-------------------|---------------|---------------|---------------|---------------|-----------------------------|
|                                              |             |              |                   | rate <sup>1</sup> | L             | H             | (ML)          | (MP)          |                             |
| CXA 1 <i>Cebus xanthosternos</i>             | Cebidae     | Cebinae      | <i>Cebus</i>      | 2.98              | 1.20          | 5.21          | 2.99          | 7             | 1                           |
| CAP 13 <i>Cebus apella</i>                   | Cebidae     | Cebinae      | <i>Cebus</i>      | 8.45              | 3.53          | 14.78         | 15.29         | 36            | 0                           |
| CCP 3 <i>Cebus capucinus</i>                 | Cebidae     | Cebinae      | <i>Cebus</i>      | 5.17              | 1.80          | 8.98          | 8.07          | 12            | 0                           |
| CEA 1 <i>Cebus albifrons</i>                 | Cebidae     | Cebinae      | <i>Cebus</i>      | 13.51             | 5.03          | 23.14         | 23.83         | 41            | 0                           |
| COV 1 <i>Cebus olivaceus</i>                 | Cebidae     | Cebinae      | <i>Cebus</i>      | 3.90              | 1.53          | 6.66          | 7.09          | 17            | 1                           |
| SOO 1 <i>Saimiri oerstedii oerstedii</i>     | Cebidae     | Saimirinae   | <i>Saimiri</i>    | 8.89              | 2.85          | 16.20         | 6.13          | 18            | 2                           |
| SSC 7 <i>Saimiri sciureus</i>                | Cebidae     | Saimirinae   | <i>Saimiri</i>    | 4.40              | 1.51          | 8.25          | 2.72          | 8             | 2                           |
| SAU 1 <i>Saimiri ustus</i>                   | Cebidae     | Saimirinae   | <i>Saimiri</i>    | 7.62              | 2.17          | 14.02         | 9.92          | 5             | 0                           |
| SBO 3 <i>Saimiri boliviensis boliviensis</i> | Cebidae     | Saimirinae   | <i>Saimiri</i>    | 4.81              | 1.89          | 8.04          | 9.60          | 25            | 0                           |
| CBS 1 <i>Callicebus brunneus</i>             | Pitheciidae | Callicebinae | <i>Callicebus</i> | 15.30             | 7.13          | 24.73         | 50.85         | 34            | 0                           |
| CMH 1 <i>Callicebus moloch</i>               | Pitheciidae | Callicebinae | <i>Callicebus</i> | 7.32              | 3.44          | 12.07         | 21.55         | 13            | 1                           |
| CCU 2 <i>Callicebus cupreus</i>              | Pitheciidae | Callicebinae | <i>Callicebus</i> | 3.19              | 1.31          | 5.19          | 8.83          | 14            | 0                           |
| CDO 1 <i>Callicebus donacophilus</i>         | Pitheciidae | Callicebinae | <i>Callicebus</i> | 3.20              | 1.18          | 5.74          | 3.81          | 8             | 0                           |
| CCO 1 <i>Callicebus coimbrai</i>             | Pitheciidae | Callicebinae | <i>Callicebus</i> | 6.35              | 2.46          | 11.20         | 16.17         | 25            | 0                           |
| CLP 1 <i>Callicebus personatus</i>           | Pitheciidae | Callicebinae | <i>Callicebus</i> | 7.04              | 2.42          | 11.98         | 18.12         | 31            | 0                           |
| CNI 1 <i>Callicebus nigrifrons</i>           | Pitheciidae | Callicebinae | <i>Callicebus</i> | 5.43              | 2.38          | 9.10          | 25.83         | 48            | 0                           |
| CCG 1 <i>Callicebus caligatus</i>            | Pitheciidae | Callicebinae | <i>Callicebus</i> | 11.5              | 4.12          | 20.1          | 17.91         | 40            | 0                           |
| CAM 1 <i>Cacajao melanocephalus</i>          | Pitheciidae | Pitheciinae  | <i>Cacajao</i>    | 9.09              | 3.93          | 15.20         | 29.30         | 56            | 0                           |
| CCL 1 <i>Cacajao calvus</i>                  | Pitheciidae | Pitheciinae  | <i>Cacajao</i>    | 5.45              | 2.35          | 9.42          | 16.51         | 38            | 0                           |
| CIS 1 <i>Chiropotes israelita</i>            | Pitheciidae | Pitheciinae  | <i>Chiropotes</i> | 9.74              | 2.93          | 19.28         | 16.36         | 26            | 0                           |
| CSA 2 <i>Chiropotes satanas chiropotes</i>   | Pitheciidae | Pitheciinae  | <i>Chiropotes</i> | 4.83              | 1.51          | 9.43          | 7.17          | 15            | 1                           |
| PIR 1 <i>Pithecia irrorata</i>               | Pitheciidae | Pitheciinae  | <i>Pithecia</i>   | 6.57              | 2.41          | 11.46         | 24.58         | 37            | 1                           |
| PPT 1 <i>Pithecia pithecia</i>               | Pitheciidae | Pitheciinae  | <i>Pithecia</i>   | 7.45              | 3.04          | 13.06         | 26.89         | 42            | 2                           |
