# Supplementary material
Source: PubMed Central journal article supplement (PMC3060065)
Supplement: pgen.1001342.s022.pdf [file pgen.1001342.s022.pdf]

Table S9. Genome rates, branch lengths, and indels for catarrhine species.

| SPECIES                                        | SUPERFAMILY      | FAMILY          | SUBFAMILY       | TRIBE          | GENUS          | Substitution      | Rate 95% | Rate 95% | Branch Length | Branch Length | Number of  |
|------------------------------------------------|------------------|-----------------|-----------------|----------------|----------------|-------------------|----------|----------|---------------|---------------|------------|
|                                                |                  |                 |                 |                |                | rate <sup>1</sup> | HPD-L    | HPD-H    | (ML)          | (MP)          | indels per |
| CAB 1 Cercopithecus albogularis kolbi          | Cercopithecoidea | Cercopithecidae | Cercopithecinae | Cercopithecini | Cercopithecus  | 5.49              | 2.37     | 9.02     | 5.29          | 12            | 0          |
| CMT 1 Cercopithecus mitis                      | Cercopithecoidea | Cercopithecidae | Cercopithecinae | Cercopithecini | Cercopithecus  | 3.87              | 1.73     | 6.31     | 2.43          | 5             | 0          |
| CAS 1 Cercopithecus ascanius schmidti          | Cercopithecoidea | Cercopithecidae | Cercopithecinae | Cercopithecini | Cercopithecus  | 6.75              | 3.92     | 9.95     | 15.65         | 45            | 0          |
| CCE 1 Cercopithecus cephus                     | Cercopithecoidea | Cercopithecidae | Cercopithecinae | Cercopithecini | Cercopithecus  | 3.49              | 1.87     | 5.24     | 7.43          | 22            | 0          |
| CPP 1 Cercopithecus petaurista petaurista      | Cercopithecoidea | Cercopithecidae | Cercopithecinae | Cercopithecini | Cercopithecus  | 4.27              | 2.37     | 6.33     | 13.31         | 33            | 0          |
| CDA 3 Cercopithecus diana                      | Cercopithecoidea | Cercopithecidae | Cercopithecinae | Cercopithecini | Cercopithecus  | 4.17              | 2.88     | 5.59     | 21.56         | 62            | 1          |
| CWW 1 Cercopithecus wolfi wolfi                | Cercopithecoidea | Cercopithecidae | Cercopithecinae | Cercopithecini | Cercopithecus  | 2.36              | 1.51     | 3.39     | 6.35          | 14            | 1          |
| CMO 2 Cercopithecus mona                       | Cercopithecoidea | Cercopithecidae | Cercopithecinae | Cercopithecini | Cercopithecus  | 11.41             | 8.05     | 14.64    | 48.14         | 83            | 0          |
| CNE 1 Cercopithecus neglectus                  | Cercopithecoidea | Cercopithecidae | Cercopithecinae | Cercopithecini | Cercopithecus  | 4.90              | 3.24     | 6.73     | 25.75         | 42            | 1          |
| CHH 1 Cercopithecus hamlyni hamlyni            | Cercopithecoidea | Cercopithecidae | Cercopithecinae | Cercopithecini | Cercopithecus  | 5.30              | 3.78     | 6.95     | 33.07         | 104           | 0          |
| MOG 1 Miopithecus ogoensis                     | Cercopithecoidea | Cercopithecidae | Cercopithecinae | Cercopithecini | Miopithecus    | 4.54              | 3.20     | 5.83     | 33.99         | 79            | 3          |
| CAE 8 Chlorocebus aethiops                     | Cercopithecoidea | Cercopithecidae | Cercopithecinae | Cercopithecini | Chlorocebus    | 5.63              | 3.04     | 8.82     | 6.86          | 20            | 0          |
| CSB 1 Chlorocebus sabaeus                      | Cercopithecoidea | Cercopithecidae | Cercopithecinae | Cercopithecini | Chlorocebus    | 5.87              | 2.99     | 9.05     | 7.20          | 22            | 0          |
| CAE 4 Chlorocebus cynosuroides                 | Cercopithecoidea | Cercopithecidae | Cercopithecinae | Cercopithecini | Chlorocebus    | 3.13              | 1.68     | 4.87     | 3.35          | 10            | 0          |
| CIH 1 Cercopithecus lhoesti                    | Cercopithecoidea | Cercopithecidae | Cercopithecinae | Cercopithecini | Note 1         | 4.77              | 3.15     | 6.61     | 21.19         | 65            | 0          |
| EPA 9 Erythrocebus patas                       | Cercopithecoidea | Cercopithecidae | Cercopithecinae | Cercopithecini | Erythrocebus   | 5.45              | 3.50     | 7.41     | 24.80         | 75            | 2          |
| ANI 1 Allenopithecus nigroviridis              | Cercopithecoidea | Cercopithecidae | Cercopithecinae | Cercopithecini | Allenopithecus | 6.75              | 5.02     | 8.62     | 53.97         | 140           | 1          |
| CAC 1 Cercocebus agilis                        | Cercopithecoidea | Cercopithecidae | Cercopithecinae | Papionini      | Cercocebus     | 8.09              | 4.23     | 12.53    | 9.45          | 19            | 0          |
| CCY 1 Cercocebus chrysogaster                  | Cercopithecoidea | Cercopithecidae | Cercopithecinae | Papionini      | Cercocebus     | 2.79              | 1.48     | 4.50     | 0.73          | 2             | 0          |
| CTR 1 Cercocebus torquatus                     | Cercopithecoidea | Cercopithecidae | Cercopithecinae | Papionini      | Cercocebus     | 6.66              | 4.12     | 9.52     | 22.81         | 68            | 1          |
| MLE 2 Mandrillus leucophaeus                   | Cercopithecoidea | Cercopithecidae | Cercopithecinae | Papionini      | Mandrillus     | 5.73              | 2.80     | 9.04     | 7.81          | 22            | 0          |
| MSP 12 Mandrillus sphinx                       | Cercopithecoidea | Cercopithecidae | Cercopithecinae | Papionini      | Mandrillus     | 3.58              | 1.82     | 5.66     | 3.93          | 12            | 0          |
| LAA 1 Lophocebus albigena                      | Cercopithecoidea | Cercopithecidae | Cercopithecinae | Papionini      | Lophocebus     | 4.62              | 1.88     | 7.62     | 1.08          | 3             | 0          |
| LAT 2 Lophocebus aerrimus                      | Cercopithecoidea | Cercopithecidae | Cercopithecinae | Papionini      | Lophocebus     | 4.68              | 1.94     | 7.91     | 1.22          | 3             | 0          |
| PAN 10 Papio anubis                            | Cercopithecoidea | Cercopithecidae | Cercopithecinae | Papionini      | Papio          | 3.65              | 1.56     | 5.98     | 1.69          | 6             | 0          |
| PHM 1 Papio hamadryas                          | Cercopithecoidea | Cercopithecidae | Cercopithecinae | Papionini      | Papio          | 5.88              | 2.89     | 9.23     | 4.86          | 13            | 1          |
| PPP 2 Papio papio                              | Cercopithecoidea | Cercopithecidae | Cercopithecinae | Papionini      | Papio          | 4.87              | 2.55     | 7.71     | 5.81          | 17            | 0          |
| TGE 2 Theropithecus gelada                     | Cercopithecoidea | Cercopithecidae | Cercopithecinae | Papionini      | Theropithecus  | 3.12              | 2.04     | 4.15     | 11.51         | 28            | 0          |
| MAC 1 Macaca arctoides [fascicularis group]    | Cercopithecoidea | Cercopithecidae | Cercopithecinae | Papionini      | Macaca         | 4.57              | 2.61     | 6.87     | 10.82         | 27            | 1          |
| MTH 3 Macaca thibetana [sinica group]          | Cercopithecoidea | Cercopithecidae | Cercopithecinae | Papionini      | Macaca         | 3.46              | 1.82     | 5.17     | 7.28          | 19            | 0          |
| MFS 2 Macaca fuscata [mulatta group]           | Cercopithecoidea | Cercopithecidae | Cercopithecinae | Papionini      | Macaca         | 5.15              | 2.80     | 7.86     | 8.01          | 20            | 0          |
| MMA 14 Macaca mulatta [mulatta group]          | Cercopithecoidea | Cercopithecidae | Cercopithecinae | Papionini      | Macaca         | 4.32              | 2.31     | 6.71     | 6.16          | 20            | 0          |
| MCY 3 Macaca cyclopis[mulatta group]           | Cercopithecoidea | Cercopithecidae | Cercopithecinae | Papionini      | Macaca         | 4.77              | 2.66     | 7.12     | 8.44          | 26            | 1          |
| MFA 18 Macaca fascicularis[fascicularis group] | Cercopithecoidea | Cercopithecidae | Cercopithecinae | Papionini      | Macaca         | 4.06              | 2.50     | 5.86     | 10.79         | 31            | 1          |
| MCA 1 Macaca maura [sulawesi group]            | Cercopithecoidea | Cercopithecidae | Cercopithecinae | Papionini      | Macaca         | 3.51              | 1.83     | 5.43     | 3.30          | 10            | 1          |
| MTO 6 Macaca tonkeana [sulawesi group]         | Cercopithecoidea | Cercopithecidae | Cercopithecinae | Papionini      | Macaca         | 5.61              | 2.95     | 8.73     | 7.04          | 15            | 0          |
| MNG 3 Macaca nigra [sulawesi group]            | Cercopithecoidea | Cercopithecidae | Cercopithecinae | Papionini      | Macaca         | 6.92              | 3.81     | 10.46    | 10.42         | 32            | 0          |
| MOC 1 Macaca ochreata [sulawesi group]         | Cercopithecoidea | Cercopithecidae | Cercopithecinae | Papionini      | Macaca         | 4.09              | 2.16     | 6.12     | 5.30          | 16            | 0          |
| MNE 5 Macaca nemestrina [nemestrina group]     | Cercopithecoidea | Cercopithecidae | Cercopithecinae | Papionini      | Macaca         | 5.41              | 2.96     | 8.20     | 7.80          | 22            | 0          |
| MSI 7 Macaca silenus [nemestrina group]        | Cercopithecoidea | Cercopithecidae | Cercopithecinae | Papionini      | Macaca         | 5.48              | 3.05     | 8.26     | 8.05          | 21            | 0          |
| MSE 1 Macaca siberu [nemestrina group]         | Cercopithecoidea | Cercopithecidae | Cercopithecinae | Papionini      | Macaca         | 4.44              | 2.64     | 6.31     | 10.79         | 26            | 0          |
| MSY 3 Macaca sylvanus [african]                | Cercopithecoidea | Cercopithecidae | Cercopithecinae | Papionini      | Macaca         | 4.35              | 3.23     | 5.51     | 22.40         | 68            | 1          |
| TOB 4 Trachypithecus obscurus                  | Cercopithecoidea | Cercopithecidae | Colobinae       |                | Trachypithecus | 4.26              | 2.08     | 6.44     | 5.01          | 13            | 1          |
| TPH 1 Trachypithecus phayrei                   | Cercopithecoidea | Cercopithecidae | Colobinae       |                | Trachypithecus | 6.21              | 3.06     | 9.48     | 8.49          | 22            | 2          |
| TAU 1 Trachypithecus auratus                   | Cercopithecoidea | Cercopithecidae | Colobinae       |                | Trachypithecus | 4.19              | 2.39     | 6.20     | 8.01          | 23            | 2          |
| TDE 1 Trachypithecus delacouri                 | Cercopithecoidea | Cercopithecidae | Colobinae       |                | Trachypithecus | 4.22              | 1.96     | 6.83     | 2.23          | 6             | 0          |
| TFR 1 Trachypithecus francoisi                 | Cercopithecoidea | Cercopithecidae | Colobinae       |                | Trachypithecus | 6.26              | 3.13     | 9.82     | 4.57          | 13            | 0          |
| THA 1 Trachypithecus hatinhensis               | Cercopithecoidea | Cercopithecidae | Colobinae       |                | Trachypithecus | 4.04              | 1.99     | 6.34     | 2.82          | 9             | 0          |
| SEF 2 Semnopithecus entellus                   | Cercopithecoidea | Cercopithecidae | Colobinae       |                | Semnopithecus  | 3.85              | 1.83     | 6.17     | 1.92          | 5             | 0          |
| SHE 1 Semnopithecus hector                     | Cercopithecoidea | Cercopithecidae | Colobinae       |                | Semnopithecus  | 7.00              | 3.50     | 11.45    | 6.34          | 14            | 0          |
| SEE 1 Semnopithecus entellus entellus          | Cercopithecoidea | Cercopithecidae | Colobinae       |                | Semnopithecus  | 3.69              | 1.90     | 5.73     | 4.45          | 14            | 0          |
| TVV 2 Trachypithecus vetulus monticola         | Cercopithecoidea | Cercopithecidae | Colobinae       |                | Note 1         | 4.34              | 2.68     | 6.33     | 10.44         | 32            | 0          |

1 nucleotide substitution/site/MY

Note 1: considered for taxonomic revision for genus.

Table S9. Genome rates, branch lengths, and indels for catarrhine species.

| SPECIES                                   | SUPERFAMILY      | FAMILY          | SUBFAMILY | TRIBE | GENUS                | Substitution rate <sup>1</sup> | Rate 95% HPD-L | Rate 95% HPD-H | Branch Length (ML) | Branch Length (MP) | Number of indels per branch |
|-------------------------------------------|------------------|-----------------|-----------|-------|----------------------|--------------------------------|----------------|----------------|--------------------|--------------------|-----------------------------|
| PCN 2 <i>Pygathrix cinerea</i>            | Cercopithecoidea | Cercopithecidae | Colobinae |       | <i>Pygathrix</i>     | 5.36                           | 2.56           | 8.74           | 6.04               | 18                 | 0                           |
| PNE 2 <i>Pygathrix nemaeus</i>            | Cercopithecoidea | Cercopithecidae | Colobinae |       | <i>Pygathrix</i>     | 4.46                           | 2.09           | 7.23           | 4.38               | 13                 | 0                           |
| PNI 1 <i>Pygathrix nigripes</i>           | Cercopithecoidea | Cercopithecidae | Colobinae |       | <i>Pygathrix</i>     | 4.63                           | 2.49           | 6.82           | 9.71               | 27                 | 0                           |
| NLA 2 <i>Nasalis larvatus</i>             | Cercopithecoidea | Cercopithecidae | Colobinae |       | <i>Nasalis</i>       | 5.30                           | 3.68           | 7.24           | 33.30              | 96                 | 1                           |
| RBR 1 <i>Rhinopithecus brelichi</i>       | Cercopithecoidea | Cercopithecidae | Colobinae |       | <i>Rhinopithecus</i> | 5.18                           | 3.52           | 7.02           | 34.94              | 96                 | 1                           |
| PCM 1 <i>Presbytis comata</i>             | Cercopithecoidea | Cercopithecidae | Colobinae |       | <i>Presbytis</i>     | 3.37                           | 1.58           | 5.56           | 1.91               | 5                  | 0                           |
| PME 2 <i>Presbytis melalophos</i>         | Cercopithecoidea | Cercopithecidae | Colobinae |       | <i>Presbytis</i>     | 6.20                           | 2.98           | 10.32          | 6.30               | 13                 | 0                           |
| CGU 7 <i>Colobus guereza</i>              | Cercopithecoidea | Cercopithecidae | Colobinae |       | <i>Colobus</i>       | 5.77                           | 3.16           | 8.57           | 15.09              | 37                 | 1                           |
| CPO 2 <i>Colobus polykomos</i>            | Cercopithecoidea | Cercopithecidae | Colobinae |       | <i>Colobus</i>       | 5.23                           | 2.86           | 7.93           | 13.88              | 36                 | 0                           |
| CAN 1 <i>Colobus angolensis palliatus</i> | Cercopithecoidea | Cercopithecidae | Colobinae |       | <i>Colobus</i>       | 4.10                           | 2.39           | 6.02           | 13.89              | 39                 | 1                           |
| PBD 1 <i>Ptilocolobus badius</i>          | Cercopithecoidea | Cercopithecidae | Colobinae |       | <i>Ptilocolobus</i>  | 5.55                           | 3.86           | 7.39           | 50.29              | 136                | 0                           |
| PTR 104 <i>Pan troglodytes verus</i>      | Hominoidea       | Hominidae       | Homininae |       | <i>Pan</i>           | 6.96                           | 3.81           | 10.37          | 9.75               | 22                 | 1                           |
| PTR 60 <i>Pan troglodytes troglodytes</i> | Hominoidea       | Hominidae       | Homininae |       | <i>Pan</i>           | 3.05                           | 1.57           | 4.89           | 2.30               | 7                  | 0                           |
| PPN 8 <i>Pan paniscus</i>                 | Hominoidea       | Hominidae       | Homininae |       | <i>Pan</i>           | 5.19                           | 2.94           | 7.76           | 11.19              | 34                 | 1                           |
| HSA 34 <i>Homo sapiens</i>                | Hominoidea       | Hominidae       | Homininae |       | <i>Homo</i>          | 6.02                           | 4.58           | 7.55           | 40.51              | 127                | 1                           |
| GGO 9 <i>Gorilla gorilla</i>              | Hominoidea       | Hominidae       | Homininae |       | <i>Gorilla</i>       | 4.82                           | 3.60           | 6.15           | 40.12              | 121                | 3                           |
| PPY 155 <i>Pongo abelii</i>               | Hominoidea       | Hominidae       | Ponginae  |       | <i>Pongo</i>         | 5.43                           | 2.65           | 8.52           | 7.06               | 19                 | 1                           |
| PPY 157 <i>Pongo pygmaeus</i>             | Hominoidea       | Hominidae       | Ponginae  |       | <i>Pongo</i>         | 3.96                           | 1.95           | 6.50           | 4.51               | 11                 | 2                           |
| HAG 6 <i>Hylobates agilis</i>             | Hominoidea       | Hylobatidae     |           |       | <i>Hylobates</i>     | 5.73                           | 2.96           | 8.97           | 11.09              | 27                 | 1                           |
| HMU 6 <i>Hylobates muelleri</i>           | Hominoidea       | Hylobatidae     |           |       | <i>Hylobates</i>     | 4.42                           | 2.17           | 7.00           | 7.62               | 23                 | 0                           |
| HLA 1 <i>Hylobates lar</i>                | Hominoidea       | Hylobatidae     |           |       | <i>Hylobates</i>     | 5.65                           | 3.34           | 8.23           | 18.65              | 46                 | 0                           |
| SSY 2 <i>Symphalangus syndactylus</i>     | Hominoidea       | Hylobatidae     |           |       | <i>Symphalangus</i>  | 3.40                           | 2.28           | 4.62           | 28.62              | 78                 | 2                           |
| HCO 3 <i>Nomascus leucogenys</i>          | Hominoidea       | Hylobatidae     |           |       | <i>Nomascus</i>      | 4.87                           | 2.25           | 8.03           | 2.57               | 6                  | 0                           |
| NSI 1 <i>Nomascus siki</i>                | Hominoidea       | Hylobatidae     |           |       | <i>Nomascus</i>      | 4.76                           | 2.03           | 8.04           | 2.39               | 7                  | 0                           |
| NCN 2 <i>Nomascus concolor</i>            | Hominoidea       | Hylobatidae     |           |       | <i>Nomascus</i>      | 5.10                           | 2.30           | 8.25           | 4.89               | 8                  | 0                           |
| NGA 2 <i>Nomascus gabriellae</i>          | Hominoidea       | Hylobatidae     |           |       | <i>Nomascus</i>      | 3.91                           | 1.86           | 6.17           | 3.15               | 80                 | 0                           |

<sup>1</sup> nucleotide substitution/site/MY

Note 1: considered for taxonomic revision for genus.
