# Supplementary material
Source: PubMed Central journal article supplement (PMC3060065)
Supplement: pgen.1001342.s023.pdf [file pgen.1001342.s023.pdf]

Table S10. Genome rates across primate genera.

| FAMILY          | GENUS          | Mean Substitution Rate (x10 <sup>-4</sup> ) | S.E.  |
|-----------------|----------------|---------------------------------------------|-------|
| Cercopithecidae |                |                                             |       |
|                 | Allenopithecus | 6.747                                       | 0.125 |
|                 | Cercocebus     | 5.190                                       | .     |
|                 | Cercopithecus  | 4.923                                       | 0.201 |
|                 | Chlorocebus    | 4.866                                       | 0.413 |
|                 | Colobus        | 5.181                                       | 0.478 |
|                 | Erythrocebus   | 5.451                                       | 0.317 |
|                 | Lophocebus     | 5.444                                       | .     |
|                 | Macaca         | 4.595                                       | .     |
|                 | Mandrillus     | 4.461                                       | 0.165 |
|                 | Miopithecus    | 4.542                                       | .     |
|                 | Nasalis        | 5.304                                       | .     |
|                 | Papio          | 4.927                                       | .     |
|                 | Piliocolobus   | 5.550                                       | 0.385 |
|                 | Presbytis      | 4.639                                       | .     |
|                 | Pygathrix      | 5.001                                       | 0.828 |
|                 | Rhinopithecus  | 5.177                                       | 0.226 |
|                 | Semnopithecus  | 5.036                                       | 0.605 |
|                 | Tracypithecus  | 4.787                                       | 0.230 |
| Hominidae       |                |                                             |       |
|                 | Gorilla        | 4.82                                        | .     |
|                 | Homo           | 6.02                                        | .     |
|                 | Pan            | 5.16                                        | 1.510 |
|                 | Pongo          | 4.729                                       | 0.735 |
| Hylobatidae     |                |                                             |       |
|                 | Hylobates      | 5.885                                       | 0.744 |
|                 | Nomascus       | 4.467                                       | 0.220 |
|                 | Symphalanges   | 3.991                                       | .     |
| Atelidae        |                |                                             |       |
|                 | Alouatta       | 8.154                                       | 1.636 |
|                 | Ateles         | 7.287                                       | 0.819 |
|                 | Brachyteles    | 7.491                                       | 1.318 |
|                 | Lagothrix      | 6.549                                       | 1.404 |
|                 |                |                                             |       |
| Cebidae         |                |                                             |       |
|                 | Aotus          | 7.359                                       | 1.238 |
|                 | Callimico      | 8.141                                       | .     |
|                 | Callithrix     | 6.899                                       | 0.714 |

|                |                |        |       |
|----------------|----------------|--------|-------|
|                | Cebuella       | 6.970  | .     |
|                | Cebus          | 7.501  | 0.999 |
|                | Leontopithecus | 7.261  | 0.842 |
|                | Mico           | 8.092  | 2.082 |
|                | Saguinus       | 7.055  | 0.647 |
|                | Saimiri        | 6.859  | 0.804 |
| Pitheciidae    |                |        |       |
|                | Cacajao        | 7.278  | 1.052 |
|                | Callicebus     | 7.257  | 0.783 |
|                | Chiropotes     | 7.453  | 1.428 |
|                | Pithecia       | 7.273  | 0.366 |
|                |                |        |       |
| Tarsiidae      |                |        | .     |
|                | Tarsius        | 8.765  |       |
|                |                |        |       |
| Cheirogaleidae |                |        |       |
|                | Cheirogaleus   | 5.177  | .     |
|                | Microcebus     | 6.691  | 1.220 |
|                | Mirza          | 10.717 | .     |
| Indriidae      |                |        |       |
|                | Avahi          | 7.537  | .     |
|                | Propithecus    | 6.131  | 1.063 |
| Lemuridae      |                |        |       |
|                | Eulemur        | 6.062  | 0.274 |
|                | Haplemur       | 9.342  | 4.541 |
|                | Lemur          | 5.154  | .     |
|                | Varecia        | 5.771  | 0.697 |
| Lepilemuridae  |                |        |       |
|                | Lepilemur      | 6.400  | 0.338 |
| Lorisidae      |                |        |       |
|                | Arctocebus     | 9.143  | .     |
|                | Loris          | 6.823  | .     |
|                | Nycticebus     | 6.864  | 1.728 |
|                | Perodicticus   | 6.391  | .     |
| Galagidae      |                |        |       |
|                | Galago         | 6.301  | 0.375 |
|                | Otolemur       | 6.925  | 1.354 |
| Daubentoniidae |                |        | .     |
|                | Daubentonia    | 4.289  |       |
|                |                |        |       |
