# Supplementary material
Source: PubMed Central journal article supplement (PMC3060065)
Supplement: pgen.1001342.s024.pdf [file pgen.1001342.s024.pdf]

Table S11. NCBI Accession Numbers

|    | Gene       | NCBI official gene symbol | NCBI accession numbers |   |          |
|----|------------|---------------------------|------------------------|---|----------|
| 1  | ABCA1      | ABCA1                     | HM765255               | - | HM765424 |
| 2  | ADORA3     | ADORA3                    | HM765079               | - | HM765254 |
| 3  | AFF2       | AFF2                      | HM764893               | - | HM765078 |
| 4  | AFF2.2     | AFF2                      | HM764717               | - | HM764892 |
| 5  | APP        | APP                       | HM764552               | - | HM764716 |
| 6  | ATXN7      | ATXN7                     | HM764388               | - | HM764551 |
| 7  | AXIN1      | AXIN1                     | HM764222               | - | HM764387 |
| 8  | BCHE       | BCHE                      | HM764066               | - | HM764221 |
| 9  | BCOR       | BCOR                      | HM763899               | - | HM764065 |
| 10 | BDNF       | BDNF                      | HM763764               | - | HM763898 |
| 11 | BRCA2      | BRCA2                     | HM763634               | - | HM763763 |
| 12 | CFTR       | CFTR                      | HM763500               | - | HM763633 |
| 13 | CHRNA1     | CHRNA1                    | HM763334               | - | HM763499 |
| 14 | CNR1       | CNR1                      | HM763165               | - | HM763333 |
| 15 | CREM       | CREM                      | HM763014               | - | HM763164 |
| 16 | DACH1      | DACH1                     | HM762850               | - | HM763013 |
| 17 | DCTN2      | DCTN2                     | HM762685               | - | HM762849 |
| 18 | DMRT1      | DMRT1                     | HM762501               | - | HM762684 |
| 19 | EDG1       | S1PR1                     | HM762333               | - | HM762500 |
| 20 | ERC2       | ERC2                      | HM762175               | - | HM762332 |
| 21 | FAM123B    | FAM123B                   | HM761999               | - | HM762174 |
| 22 | FBN1       | FBN1                      | HM761834               | - | HM761998 |
| 23 | FES        | FES                       | HM761675               | - | HM761833 |
| 24 | FOXP1      | FOXP1                     | HM761497               | - | HM761674 |
| 25 | GHR        | GHR                       | HM761354               | - | HM761496 |
| 26 | KCNMA1     | KCNMA1                    | HM761189               | - | HM761353 |
| 27 | LRPPRC_169 | LRPPRC                    | HM761070               | - | HM761188 |
| 28 | LRPPRC_171 | LRPPRC                    | HM760922               | - | HM761069 |
| 29 | LUC7L      | LUC7L                     | HM760769               | - | HM760921 |
| 30 | MAPKAP1    | MAPKAP1                   | HM760600               | - | HM760768 |
| 31 | MBD5       | MBD5                      | HM760431               | - | HM760599 |
| 32 | NEGR1      | NEGR1                     | HM760246               | - | HM760430 |
| 33 | NPAS3      | NPAS3                     | HM760070               | - | HM760245 |
| 34 | NPAS3.2    | NPAS3                     | HM759886               | - | HM760069 |
| 35 | PLCB4      | PLCB4                     | HM759717               | - | HM759885 |
| 36 | PNOC       | PNOC                      | HM759546               | - | HM759716 |
| 37 | POLA1      | POLA1                     | HM759363               | - | HM759545 |
| 38 | RAB6IP1    | DENND5A                   | HM759172               | - | HM759362 |
| 39 | RAG1       | RAG1                      | HM759011               | - | HM759171 |
| 40 | RAG2       | RAG2                      | HM758833               | - | HM759010 |
| 41 | RPGRIP1    | RPGRIP1                   | HM758639               | - | HM758832 |
| 42 | SGMS1      | SGMS1                     | HM758459               | - | HM758638 |
| 43 | SIM1       | SIM1                      | HM758288               | - | HM758458 |
| 44 | SMCX       | KDM5C                     | HM758126               | - | HM758287 |
| 45 | SMCY       | KDM5D                     | HM758023               | - | HM758125 |
| 46 | SRY        | SRY                       | HM757931               | - | HM758022 |
| 47 | TEX2       | TEX2                      | HM757765               | - | HM757930 |
| 48 | TTR        | TTR                       | HM757630               | - | HM757764 |
| 49 | TYR        | TYR                       | HM757455               | - | HM757629 |
| 50 | USH2A      | USH2A                     | HM757282               | - | HM757454 |
| 51 | UTY        | UTY                       | HM757170               | - | HM757281 |
| 52 | ZFX        | ZFX                       | HM757022               | - | HM757169 |

Table S11. NCBI Accession Numbers

|    |      |      |          |   |          |
|----|------|------|----------|---|----------|
| 53 | ZFY  | ZFY  | HM756932 | - | HM757021 |
| 54 | ZIC3 | ZIC3 | HM756746 | - | HM756931 |
