# Supplementary material
Source: PubMed Central journal article supplement (PMC3060065)
Supplement: pgen.1001342.s025.pdf [file pgen.1001342.s025.pdf]

Table S12. Models of nucleotide substitution for maximum likelihood phylogenetic analyses of combined and partitioned data in Fig. 2, Supplemental Figures 1-5. NOTE: Y genes only 127 individuals (males).

| Data Partition | Model   | Rate Matrix<br>(AC,AG,AT,CG,CT,GT)                       | Gamma Shape<br>Parameter | Nucleotide<br>Frequency<br>(A,G,C,T) | P-Invariant |
|----------------|---------|----------------------------------------------------------|--------------------------|--------------------------------------|-------------|
| Combined       | TVM+I+G | 1.0492<br>3.9254<br>0.6220<br>1.2887<br>3.9254<br>1.0000 | 0.8892                   | 0.2901<br>0.2101<br>0.2137<br>0.2861 | 0.2359      |
| X              | TVM+I+G | 1.3458<br>5.8210<br>0.6388<br>1.3717<br>5.8210<br>1.0000 | 0.8714                   | 0.2744<br>0.2048<br>0.2215<br>0.2993 | 0.1833      |
| Y              | TVM+I+G | 0.9110<br>3.4368<br>0.7433<br>1.7805<br>3.4368           | 1.3424                   | 0.2984<br>0.1968<br>0.2389           | 0.1486      |
| Autosome       | TVM+I+G | 1.0332<br>4.0131<br>0.5804<br>1.2855<br>4.0131<br>1.0000 | 0.8870                   | 0.2892<br>0.2130<br>0.2126<br>0.2852 | 0.2024      |
| Intron         | TVM+I+G | 1.0416<br>3.6909<br>0.5346<br>1.4049<br>3.6909<br>1.0000 | 1.0071                   | 0.3016<br>0.1881<br>0.2006<br>0.3097 | 0.1103      |
| Exon           | TrN+I+G | 1.0000<br>4.7679<br>1.0000<br>1.0000<br>5.3084<br>1.0000 | 0.8558                   | 0.2653<br>0.2504<br>0.2463<br>0.2380 | 0.3289      |
| UTR            | TVM+I+G | 1.0085<br>3.3907<br>0.5332<br>1.0395<br>3.3907<br>1.0000 | 0.8742                   | 0.2998<br>0.2011<br>0.1997<br>0.2994 | 0.1079      |
