# Supplementary material
Source: PubMed Central journal article supplement (PMC3060065)

ML phylogeny using autosome data partition

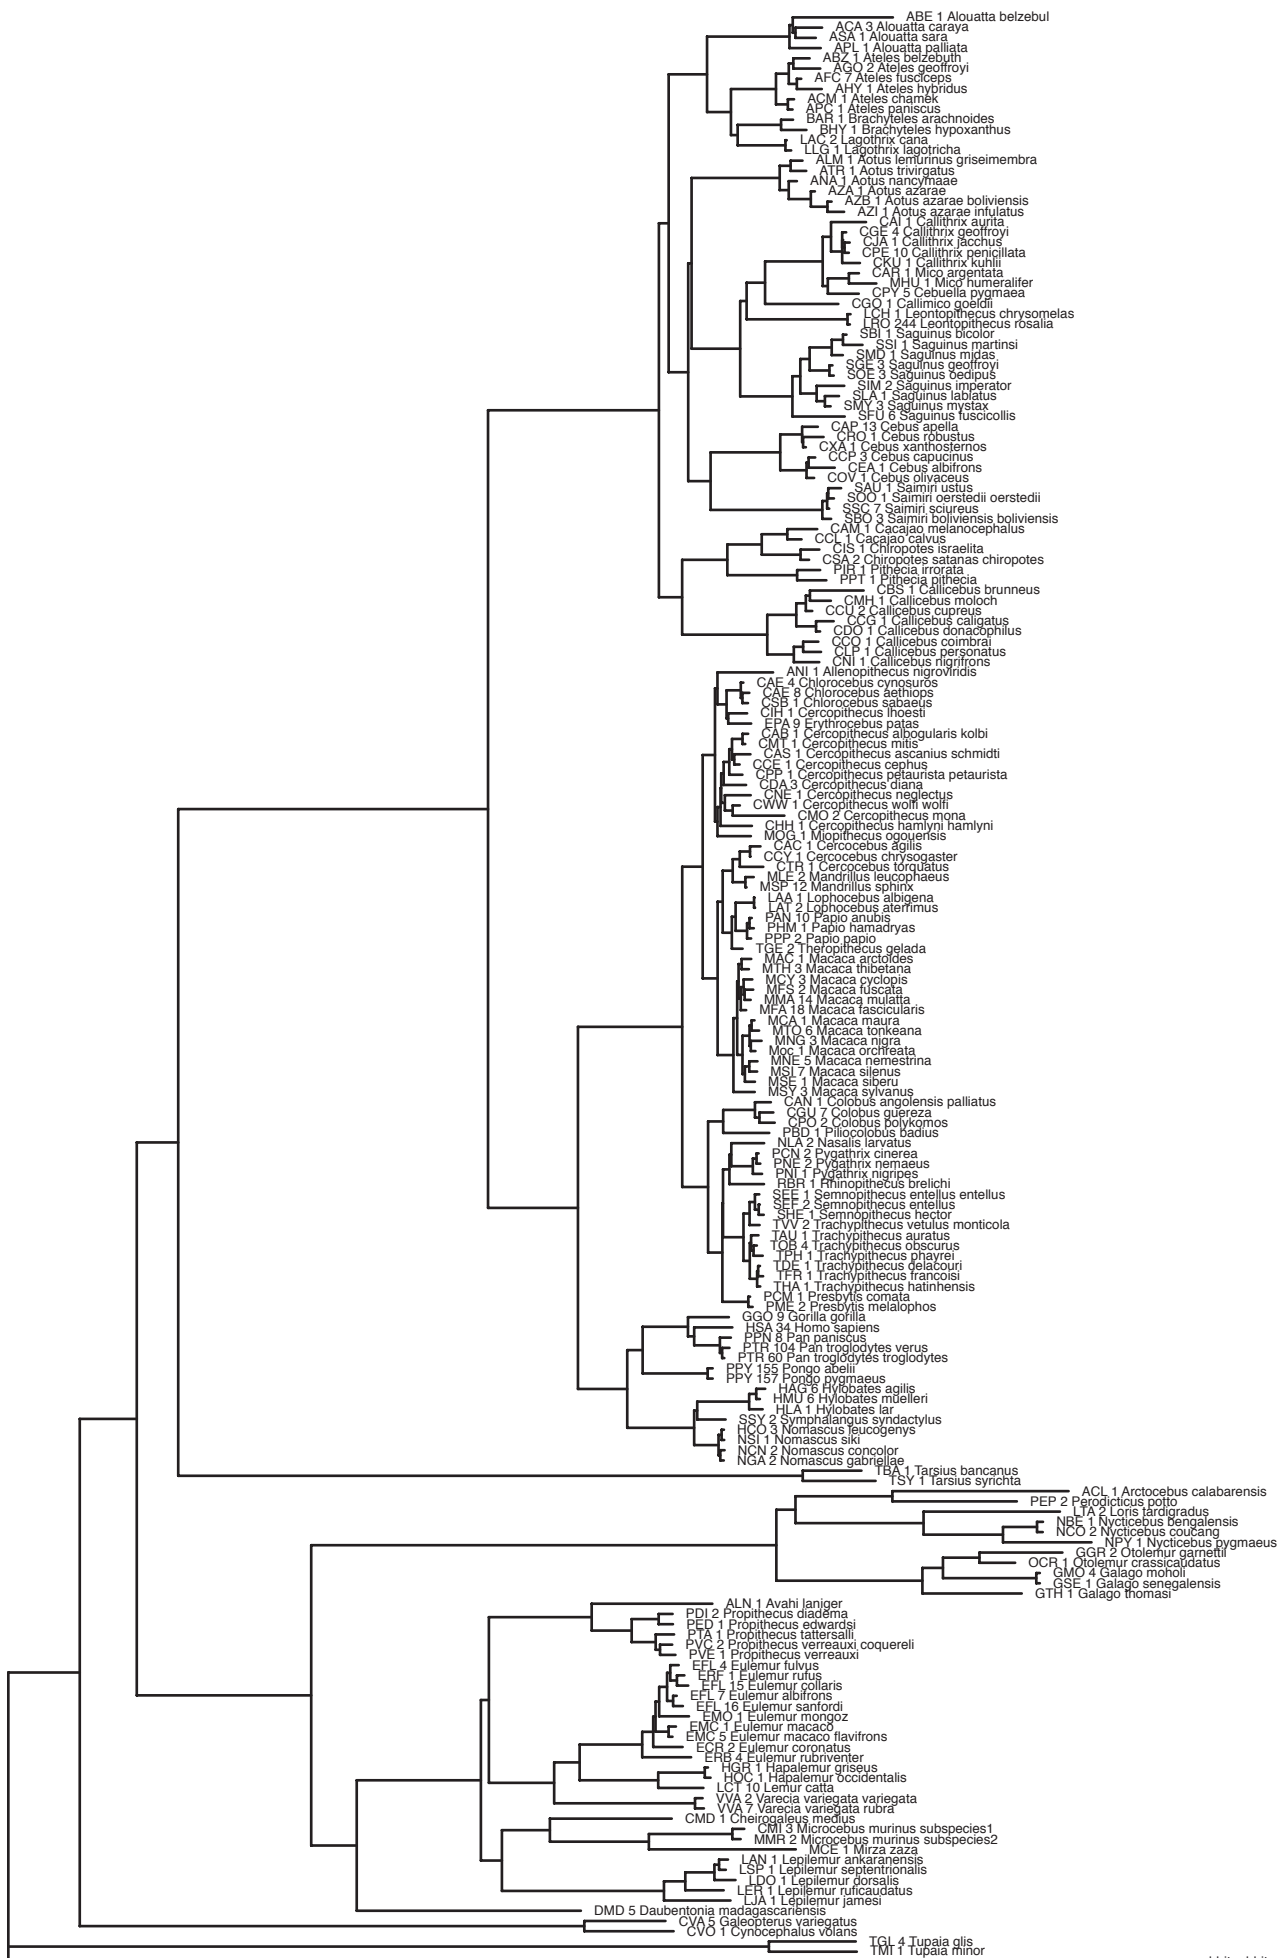

0.005 substitutions/site

rabbit rabbit

Supplement: pgen.1001342.s002.pdf [file pgen.1001342.s002.pdf]

ML Bootstrap phylogeny using autosome data partition

Majority-rule consensus tree

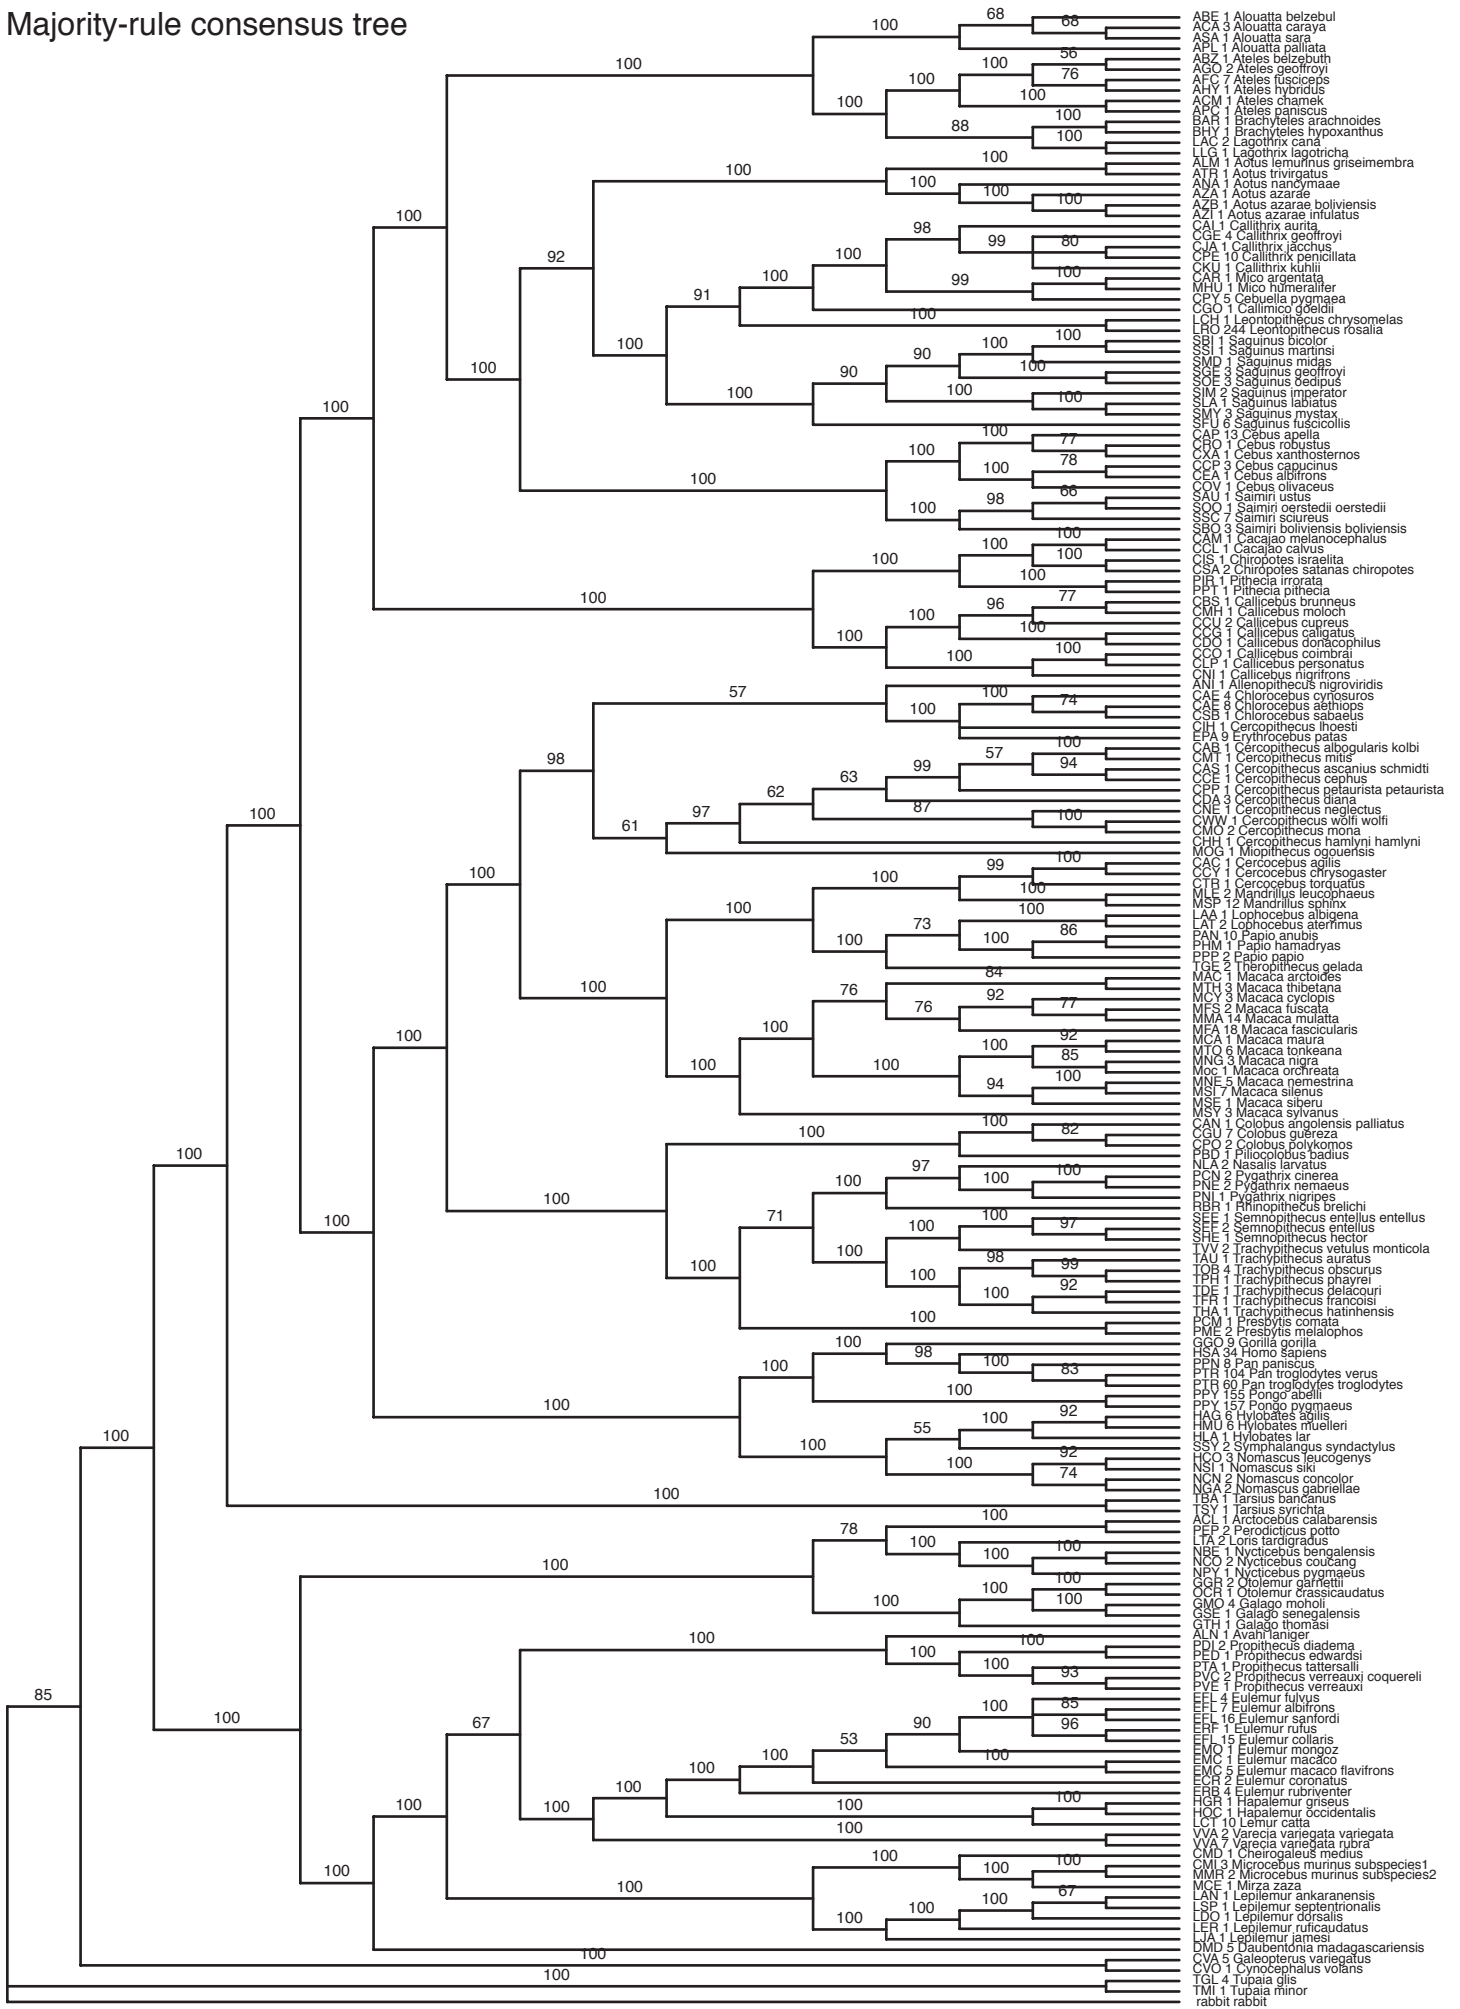

Supplement: pgen.1001342.s003.pdf [file pgen.1001342.s003.pdf]

ML phylogeny using X-linked data partition

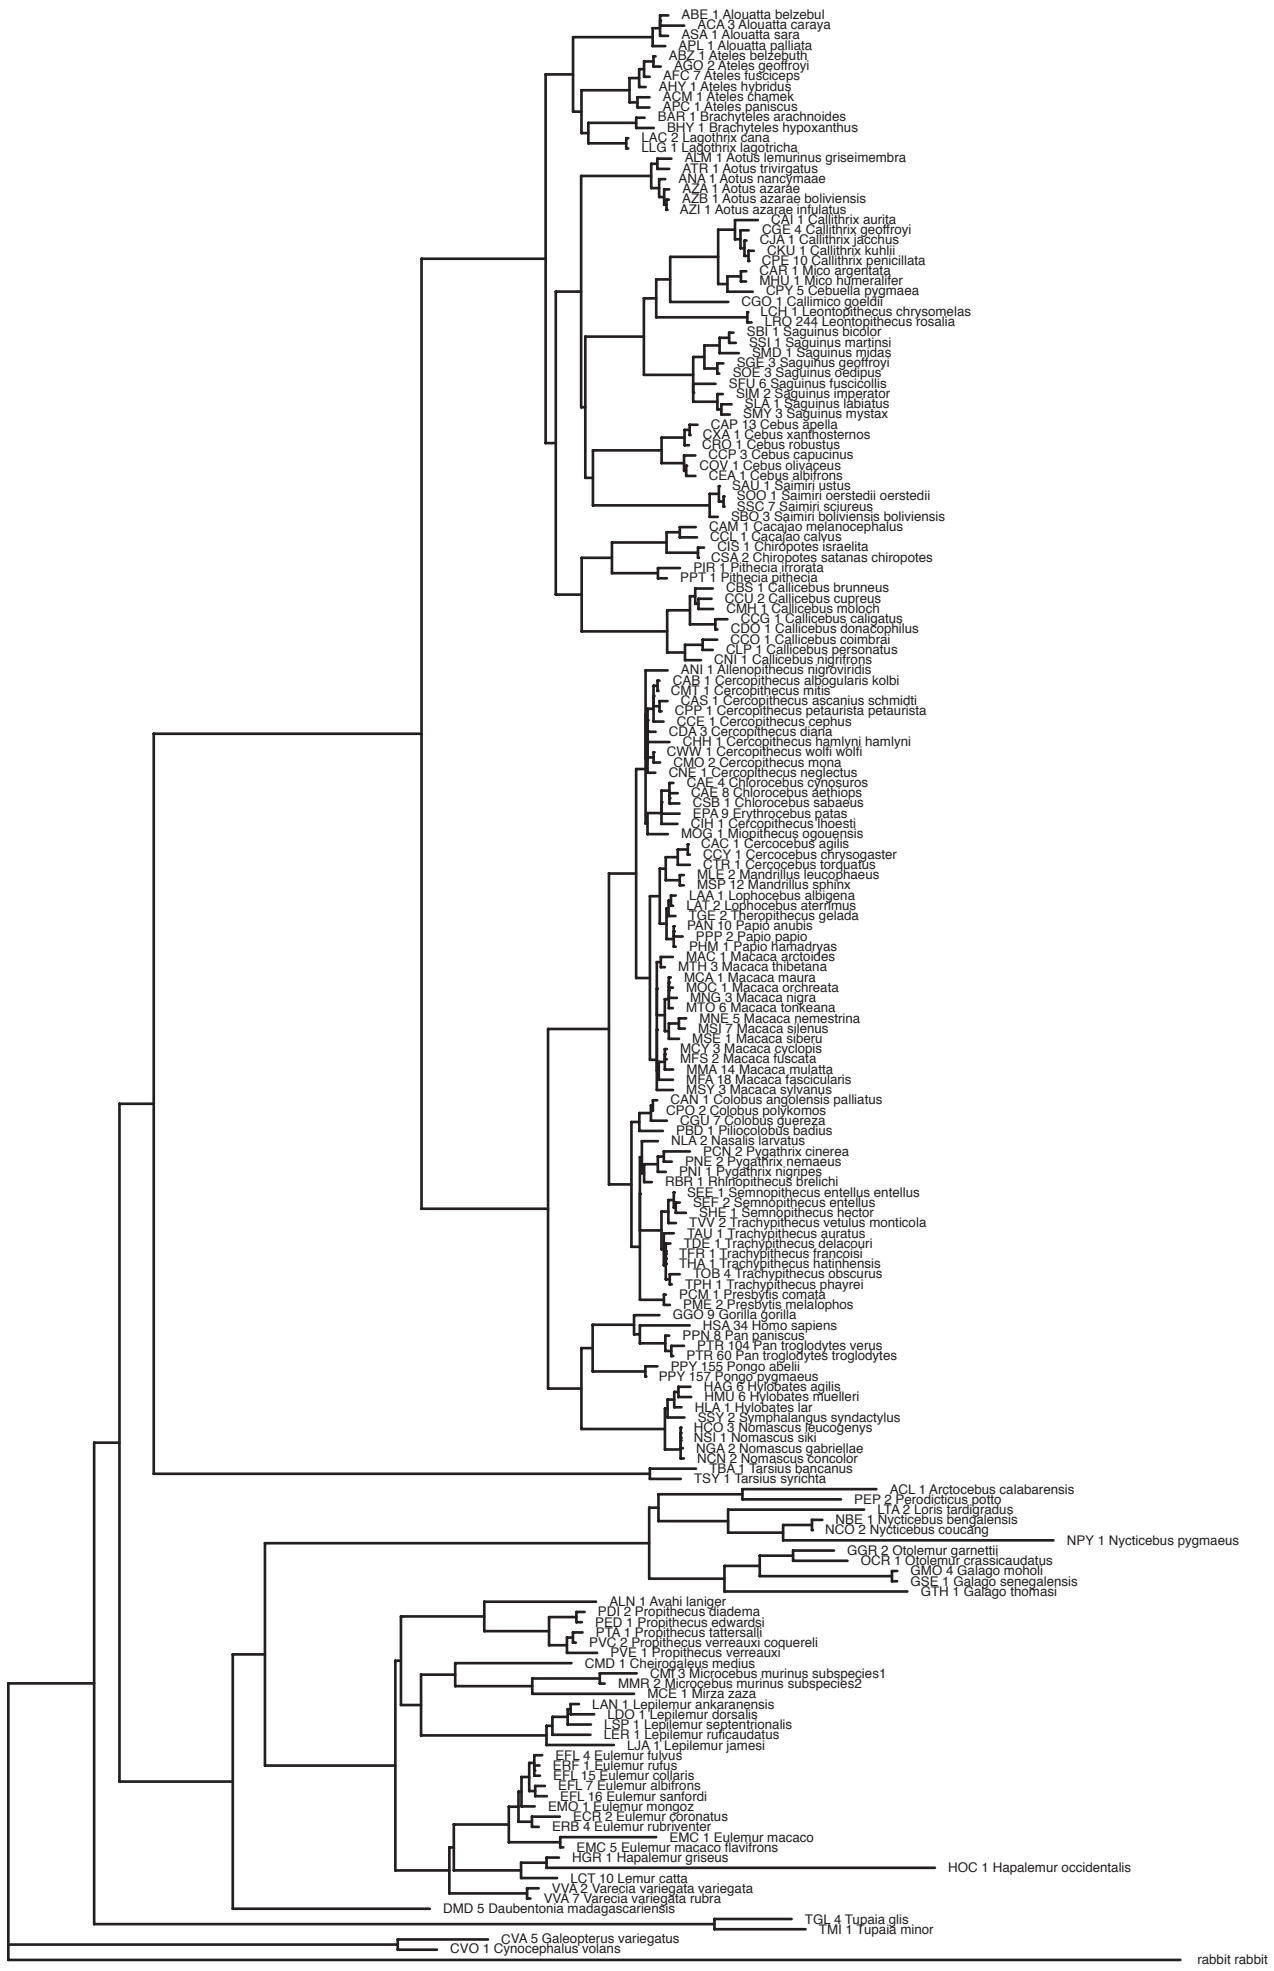

0.005 substitutions/site

rabbit rabbit

Supplement: pgen.1001342.s004.pdf [file pgen.1001342.s004.pdf]

ML Bootstrap phylogeny using X-linked data partition

Majority-rule consensus tree

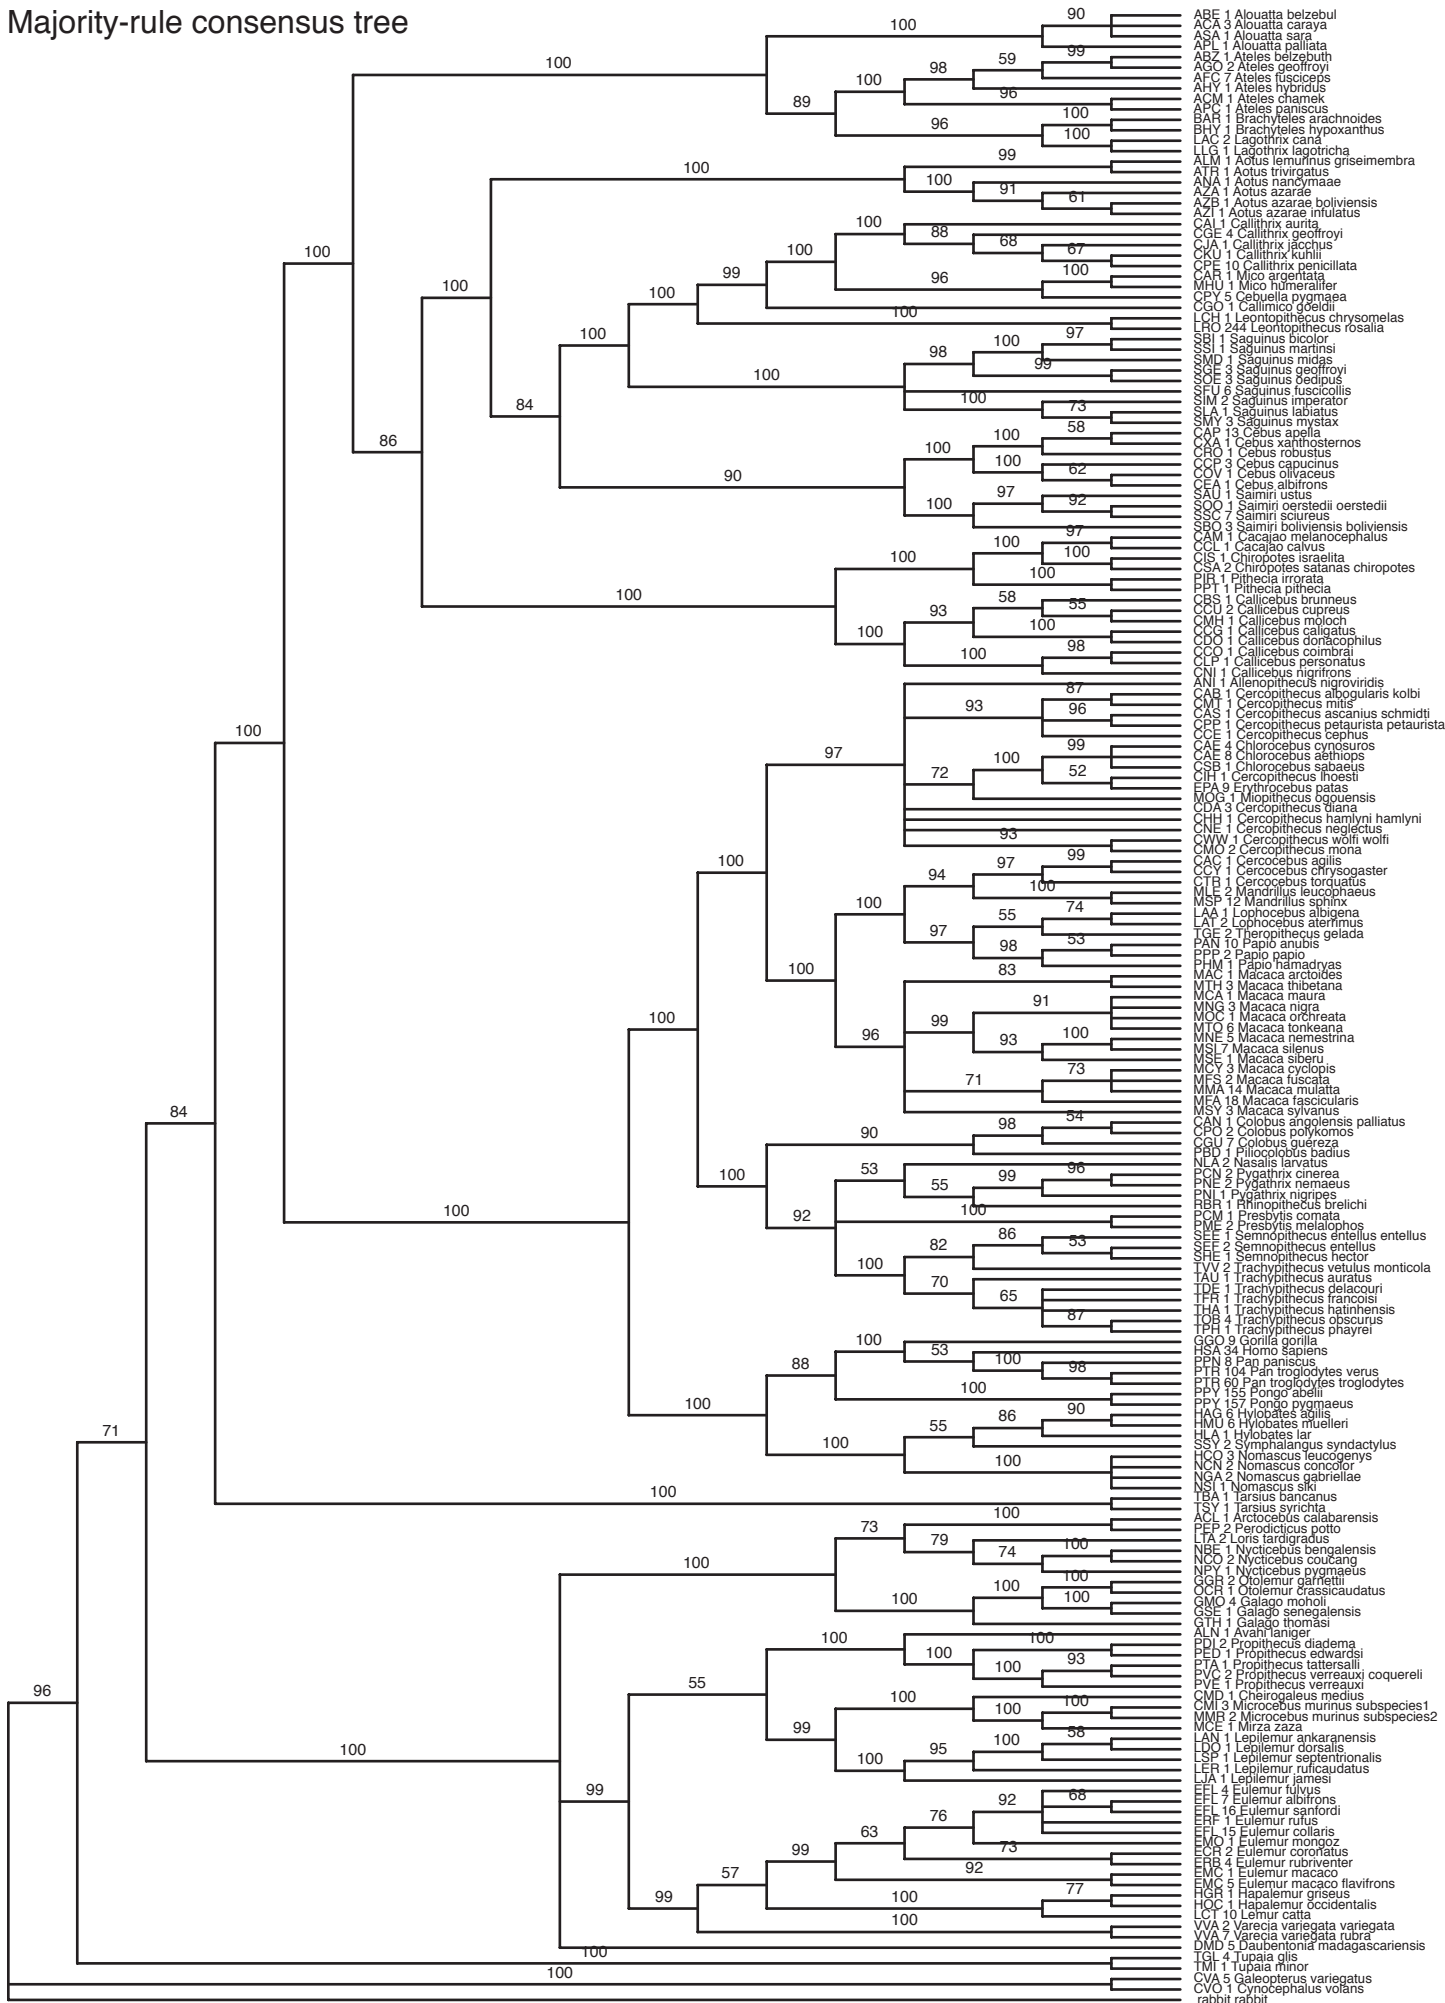

Supplement: pgen.1001342.s005.pdf [file pgen.1001342.s005.pdf]

ML phylogeny using intron data partition

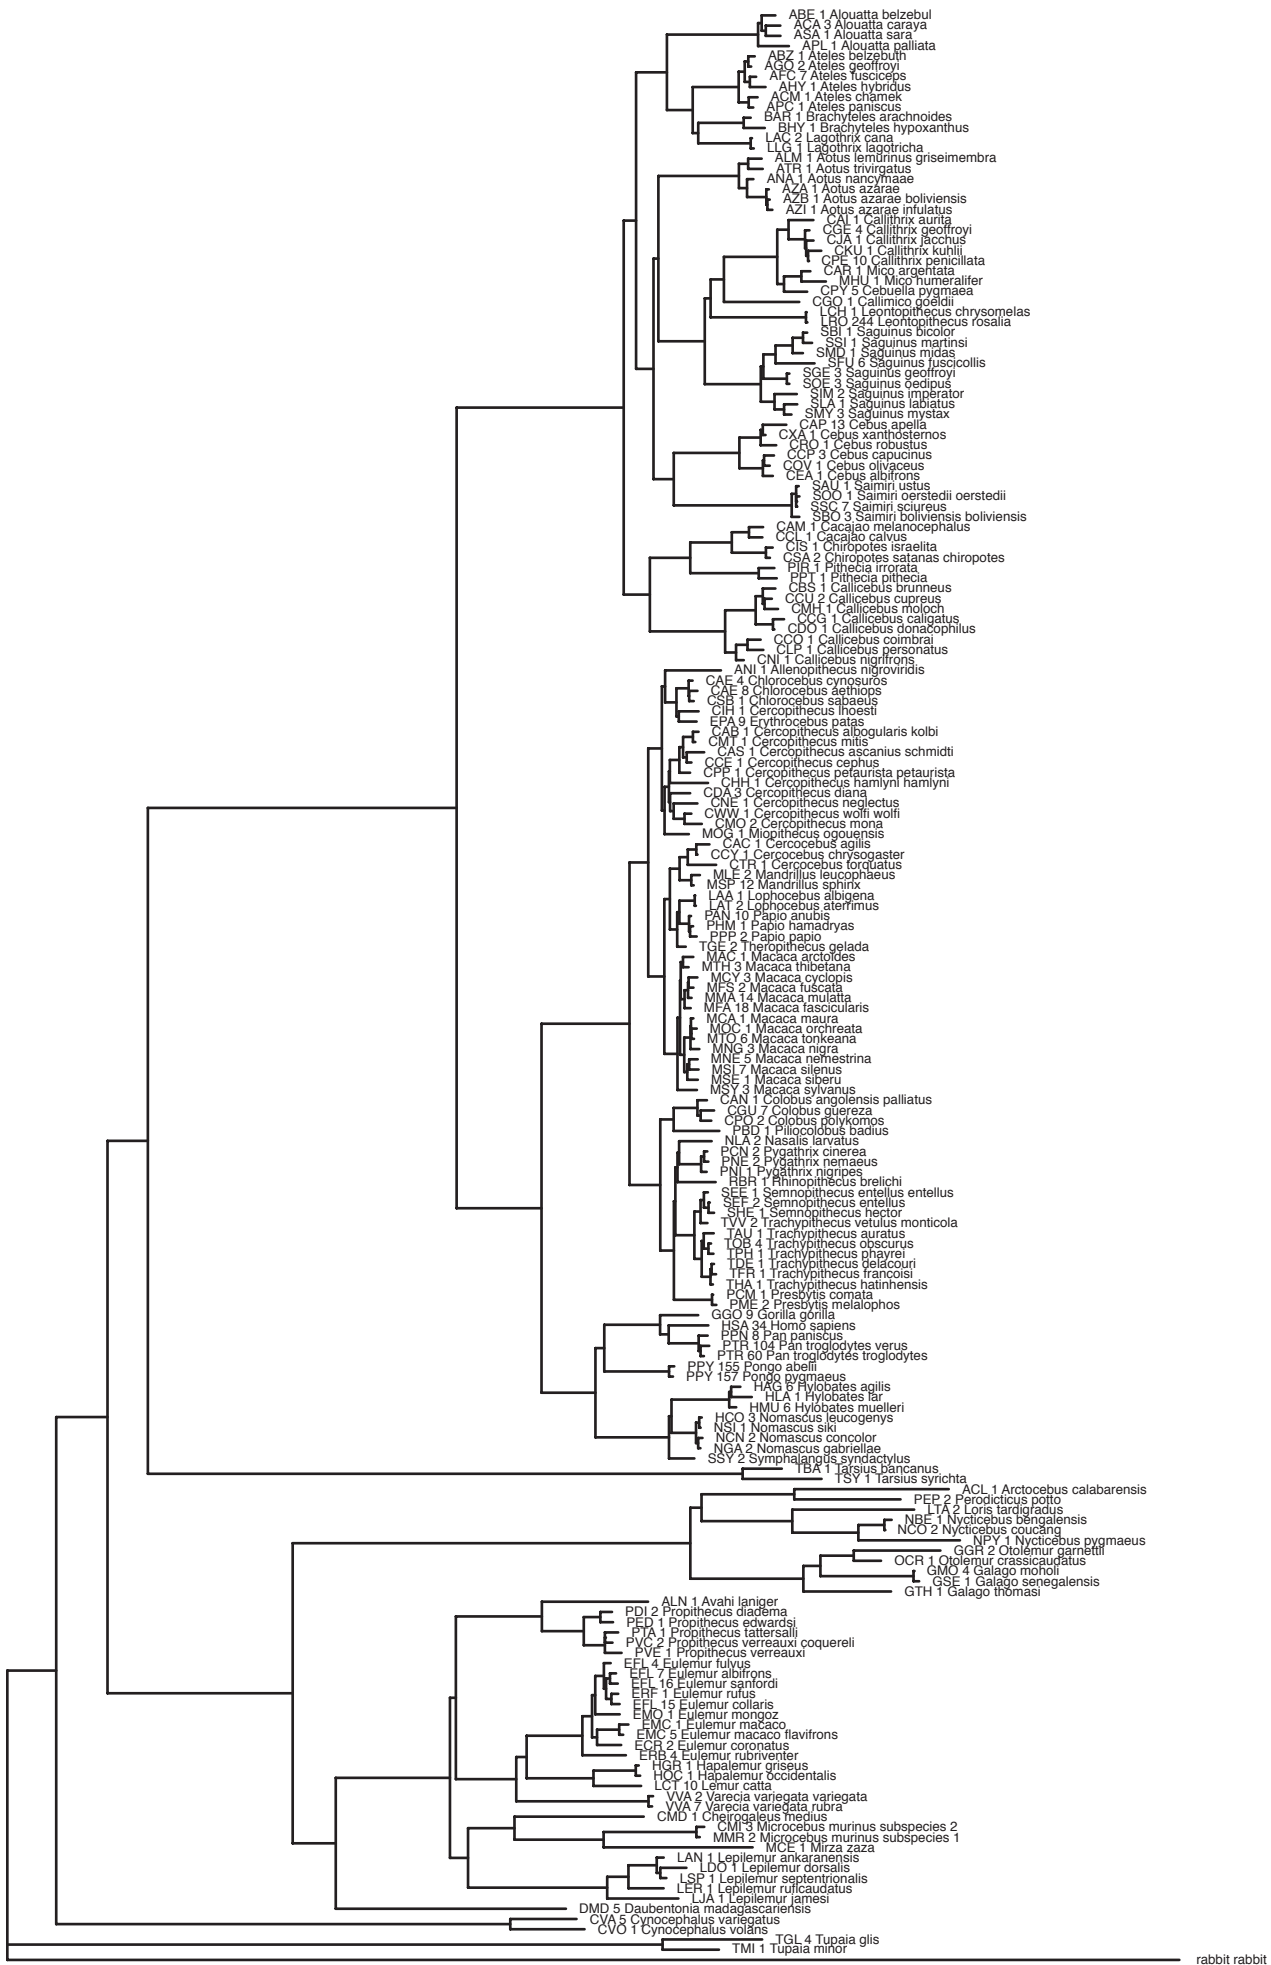

0.005 substitutions/site

rabbit rabbit

Supplement: pgen.1001342.s006.pdf [file pgen.1001342.s006.pdf]

ML Bootstrap phylogeny using intron data partition

Majority-rule consensus tree

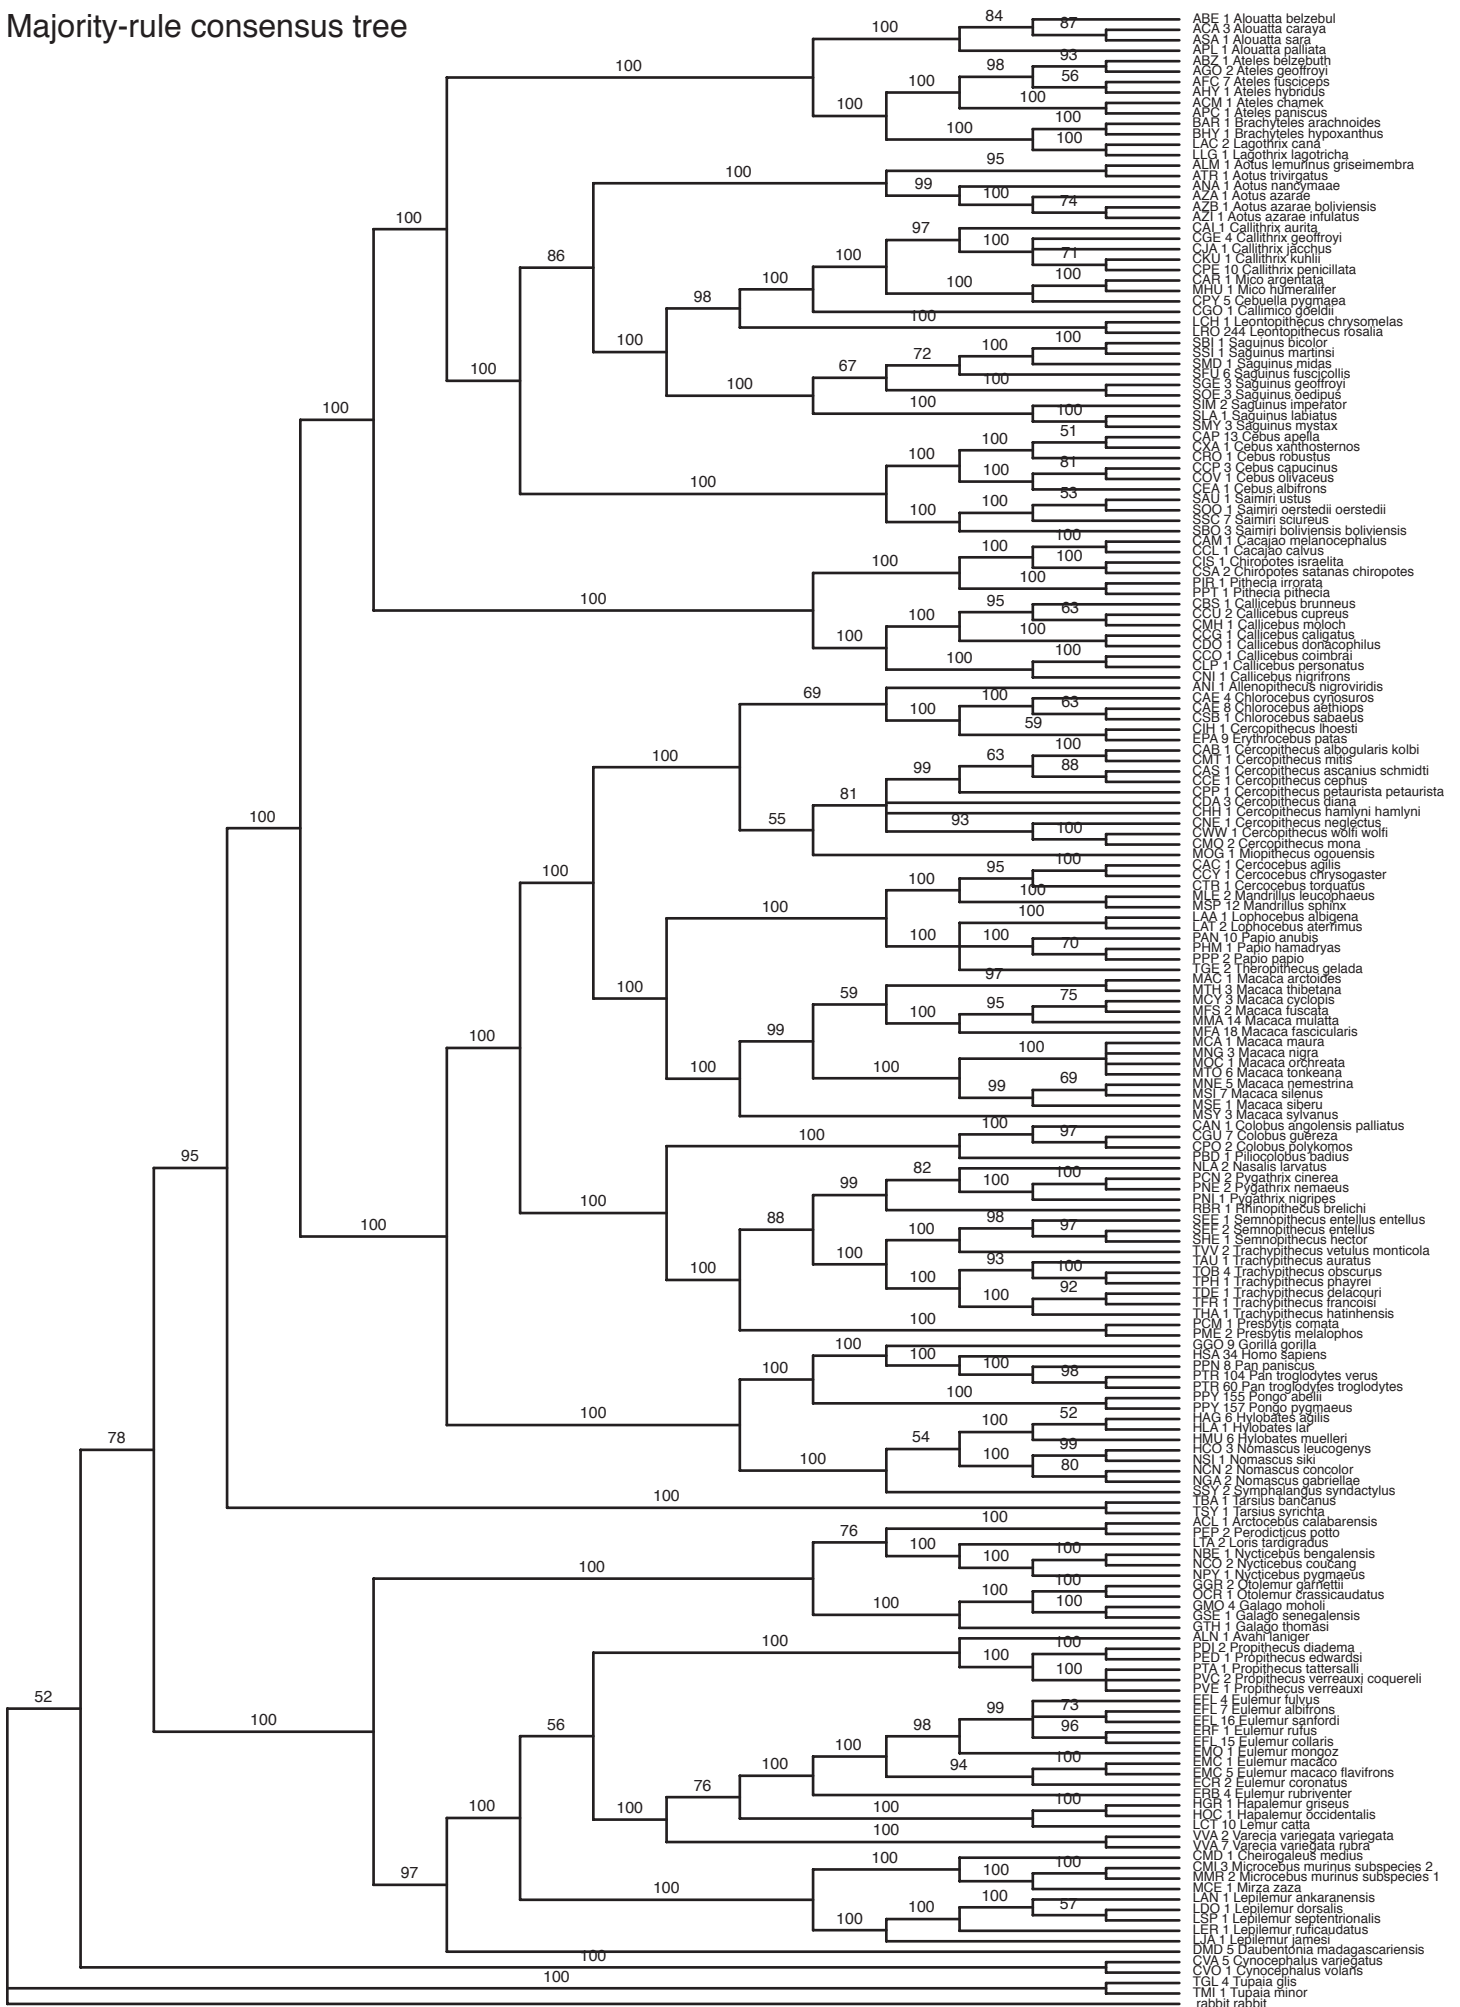

Supplement: pgen.1001342.s007.pdf [file pgen.1001342.s007.pdf]

# ML phylogeny using exon data partition

best

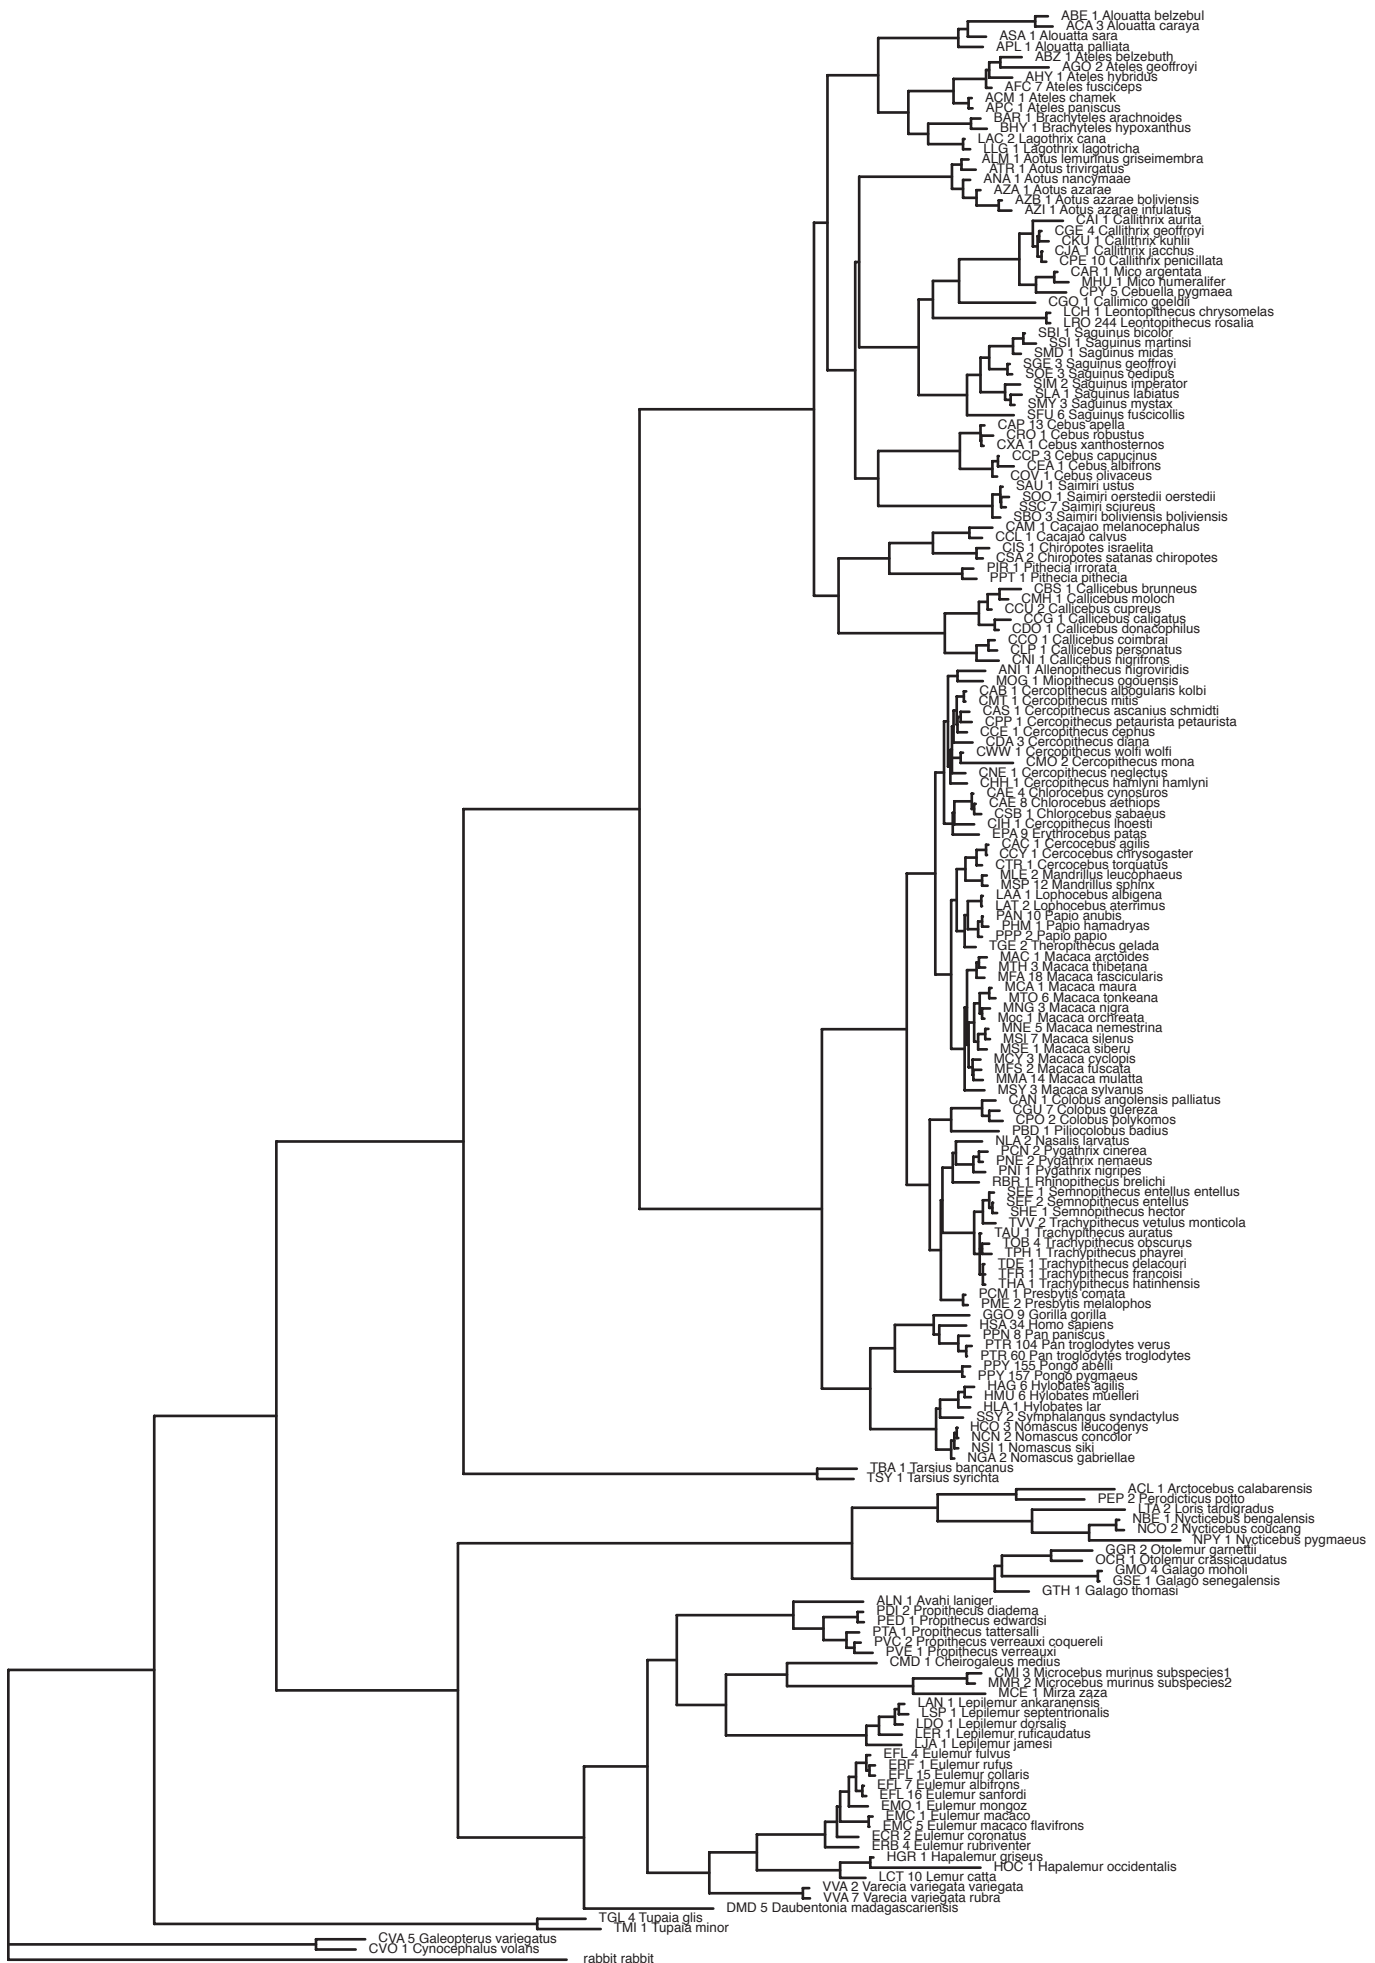

Supplement: pgen.1001342.s008.pdf [file pgen.1001342.s008.pdf]

ML Bootstrap phylogeny using exon data partition

Majority-rule consensus tree

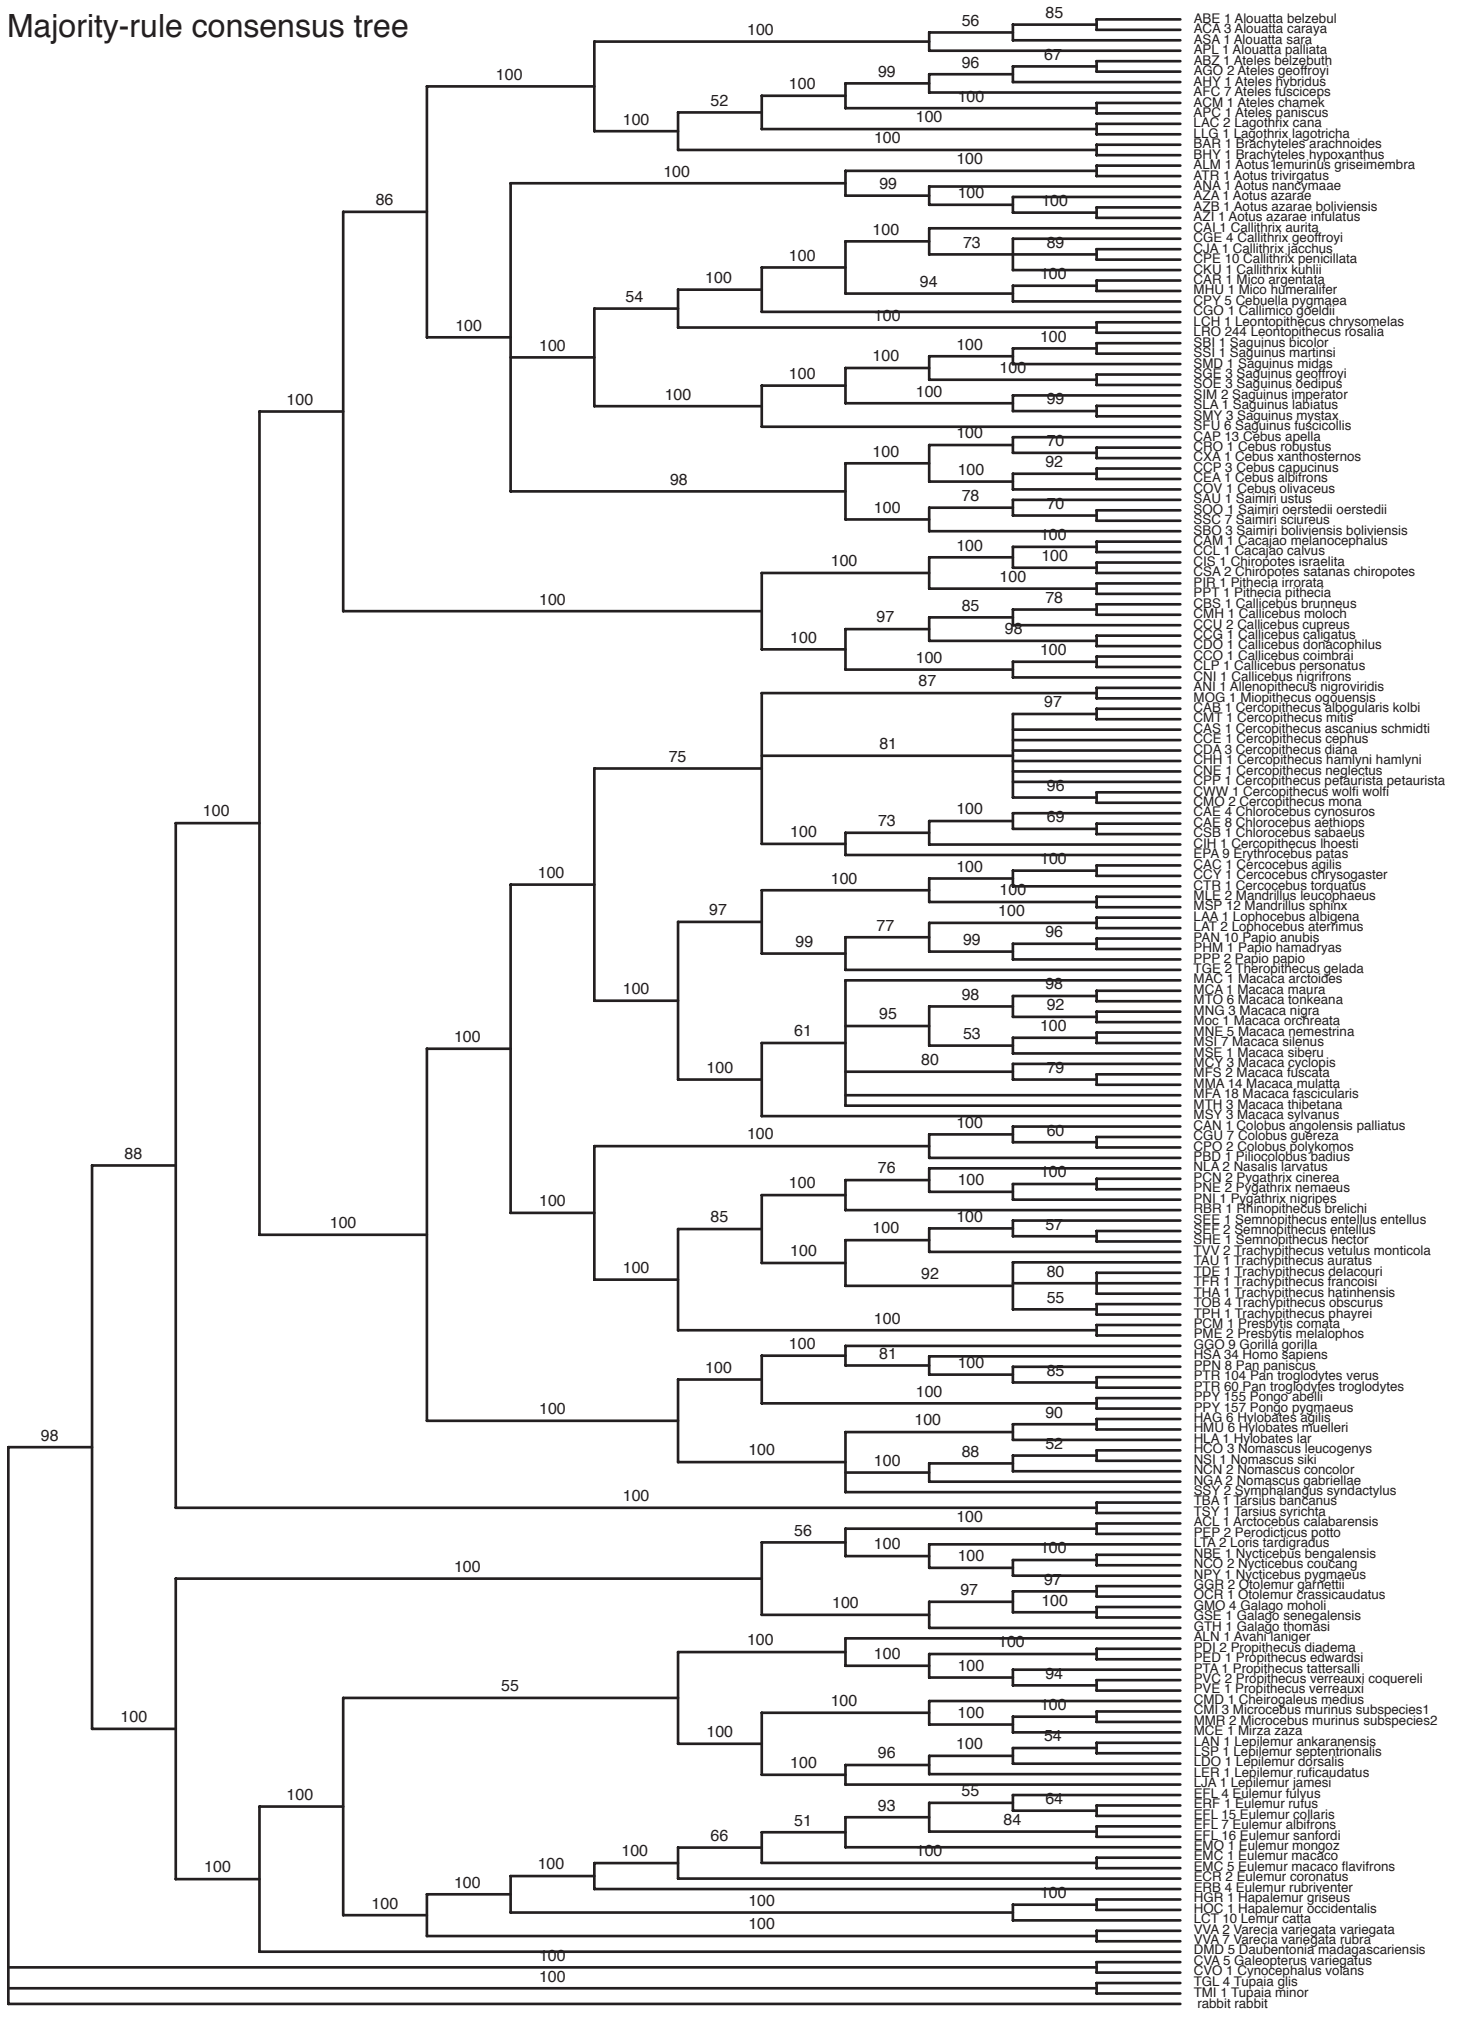

Supplement: pgen.1001342.s009.pdf [file pgen.1001342.s009.pdf]

ML phylogeny using UTR data partition

ABE 1 Alouatta belzebul

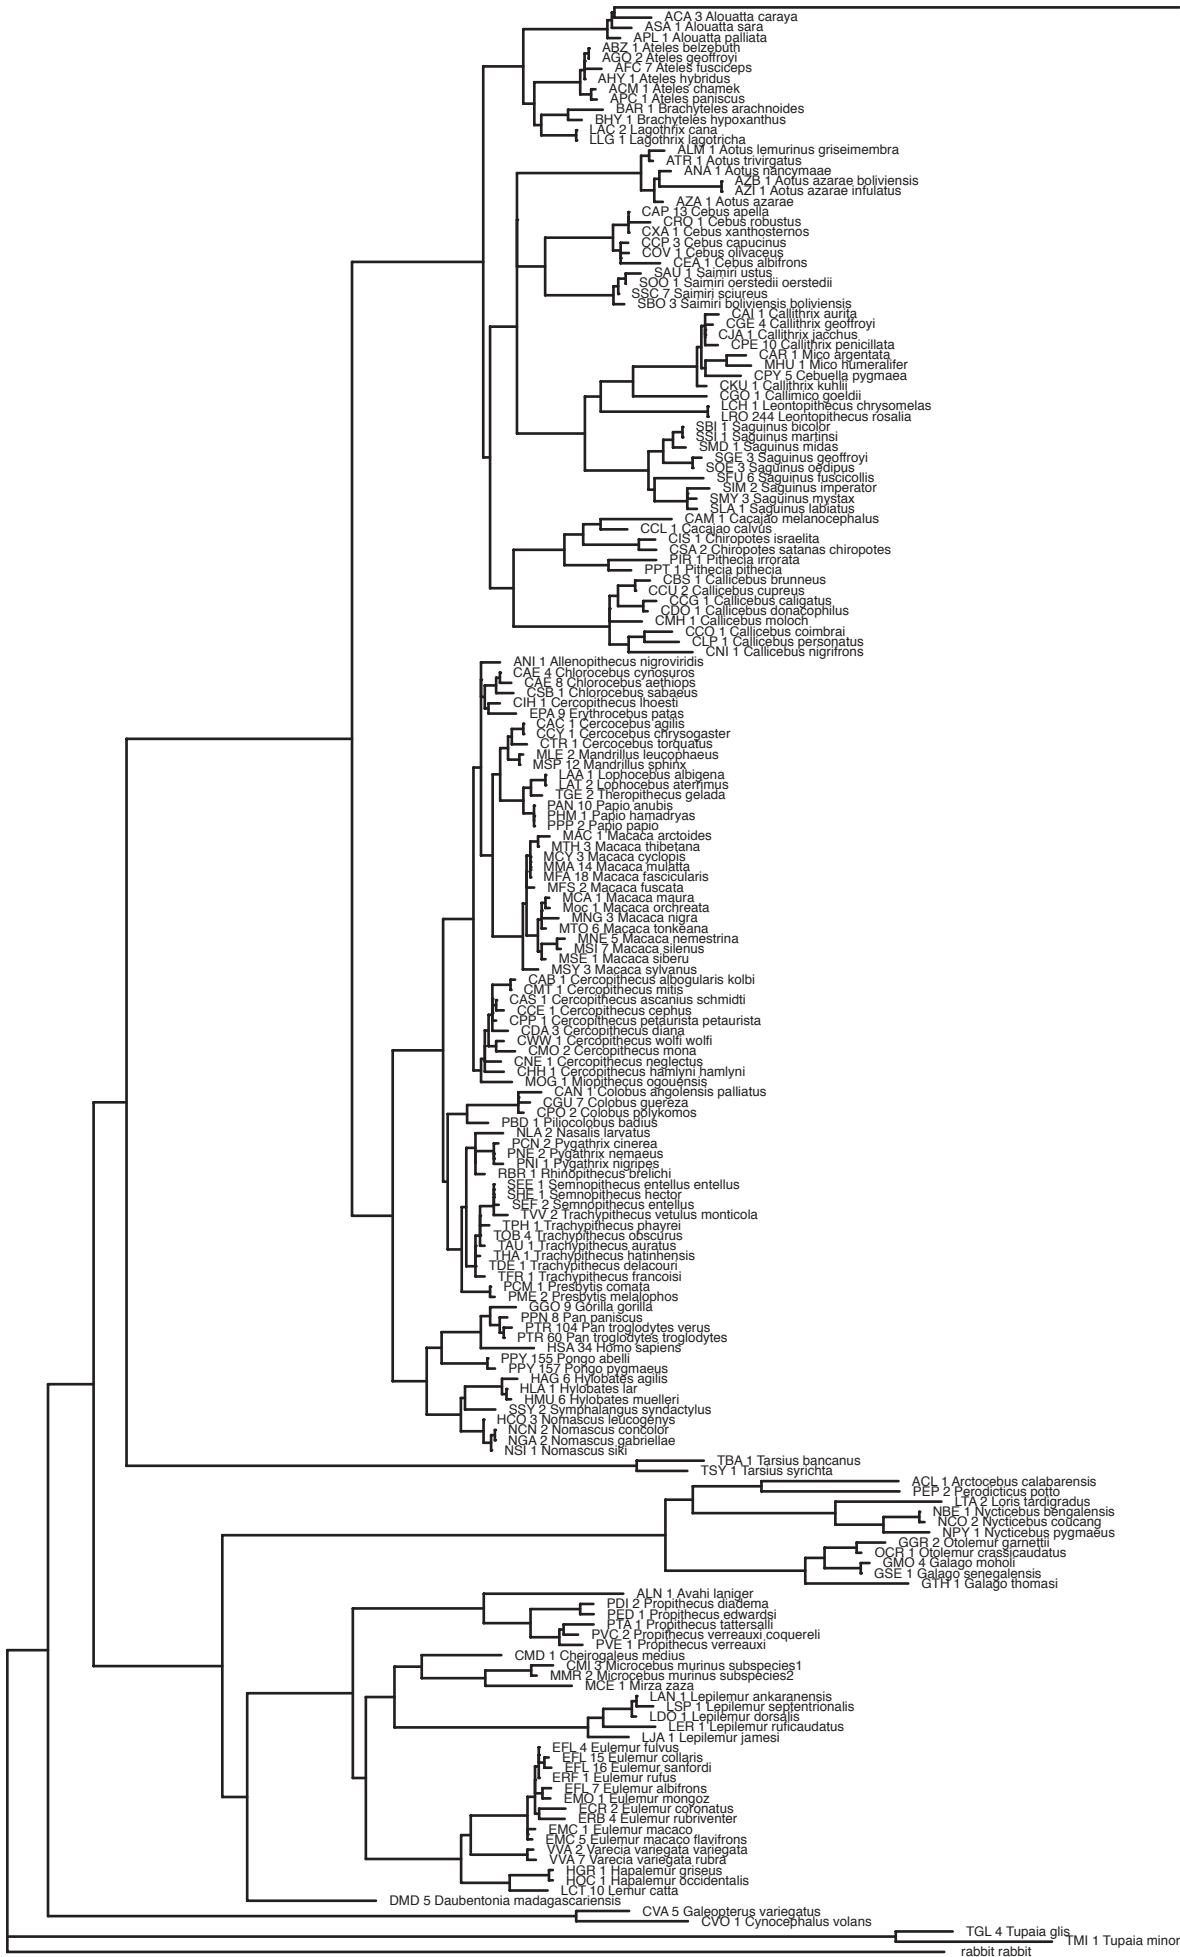

0.001 substitutions/site

Supplement: pgen.1001342.s010.pdf [file pgen.1001342.s010.pdf]

## Majority-rule consensus tree

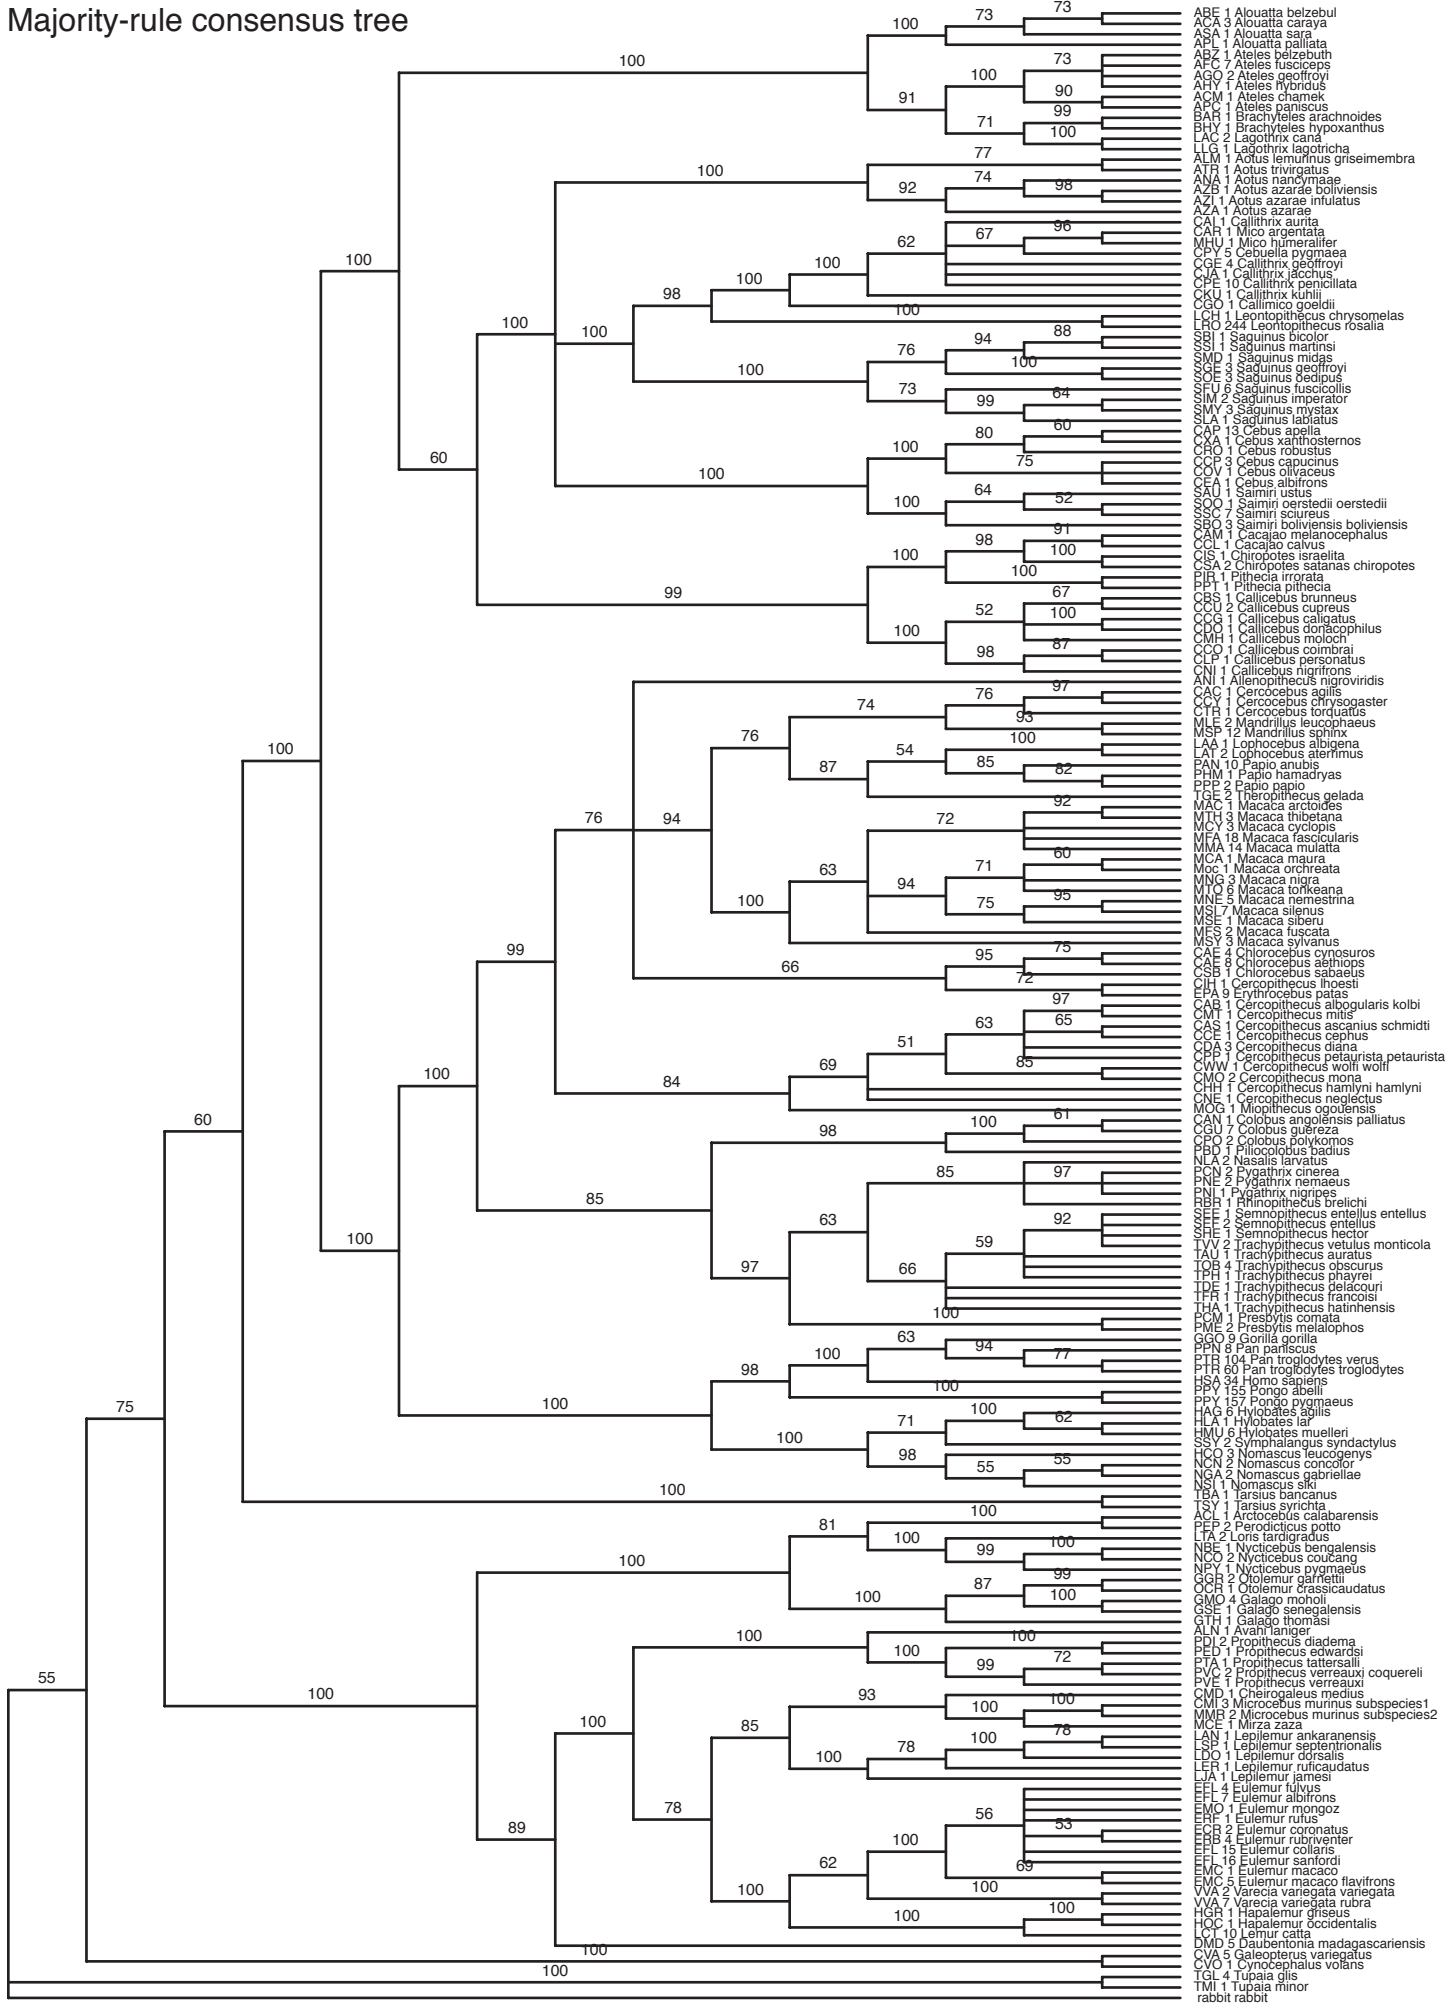

Supplement: pgen.1001342.s011.pdf [file pgen.1001342.s011.pdf]

ML phylogeny using Y-linked data partition 127 males

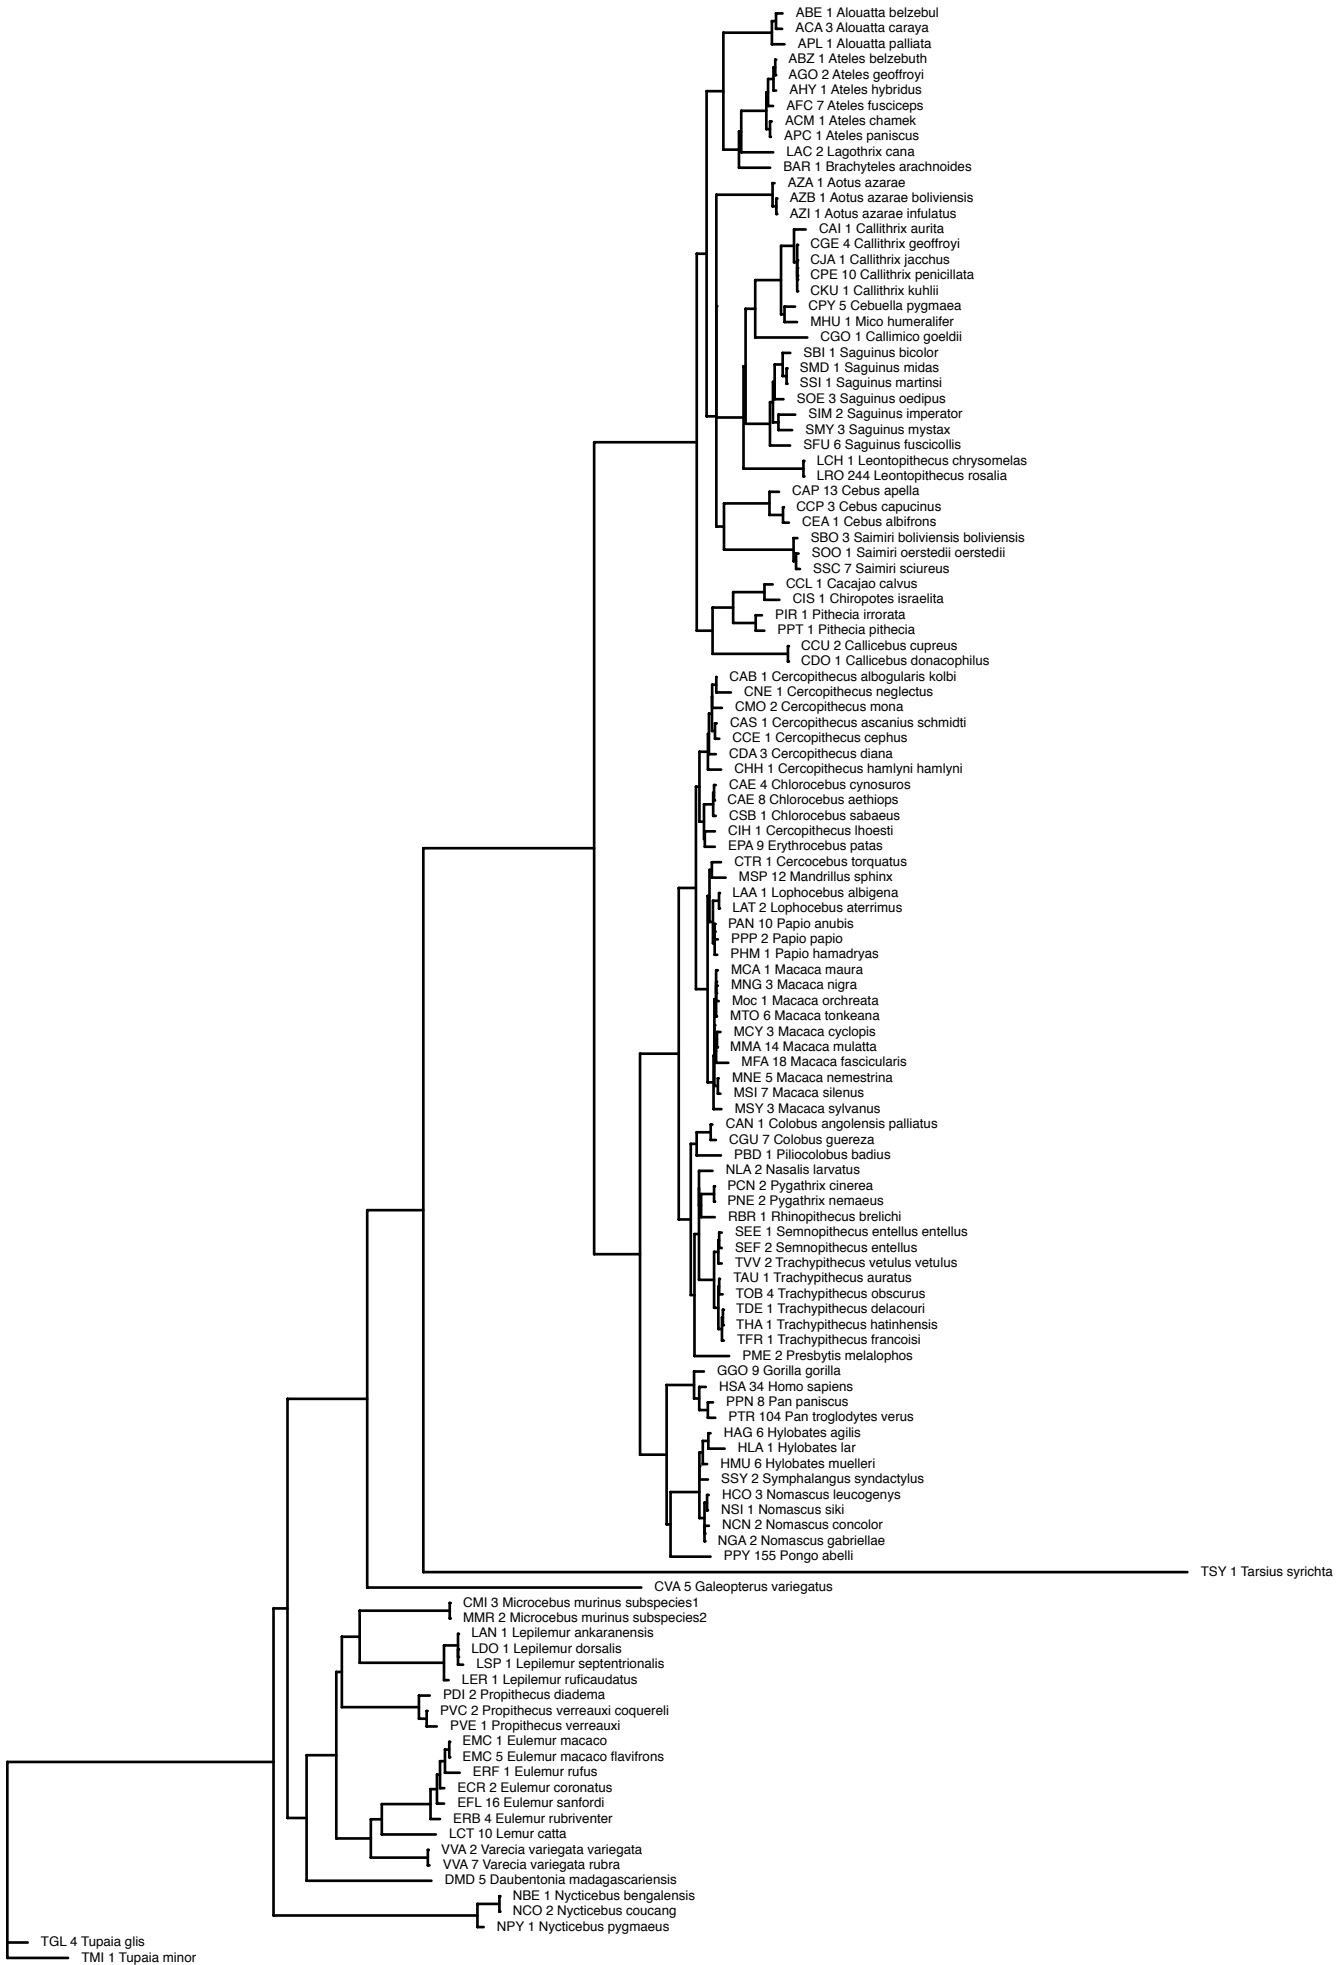

— 0.005 substitutions/site

Supplement: pgen.1001342.s012.pdf [file pgen.1001342.s012.pdf]

ML Bootstrap phylogeny using Y-linked data partition 127 males

Majority-rule consensus tree

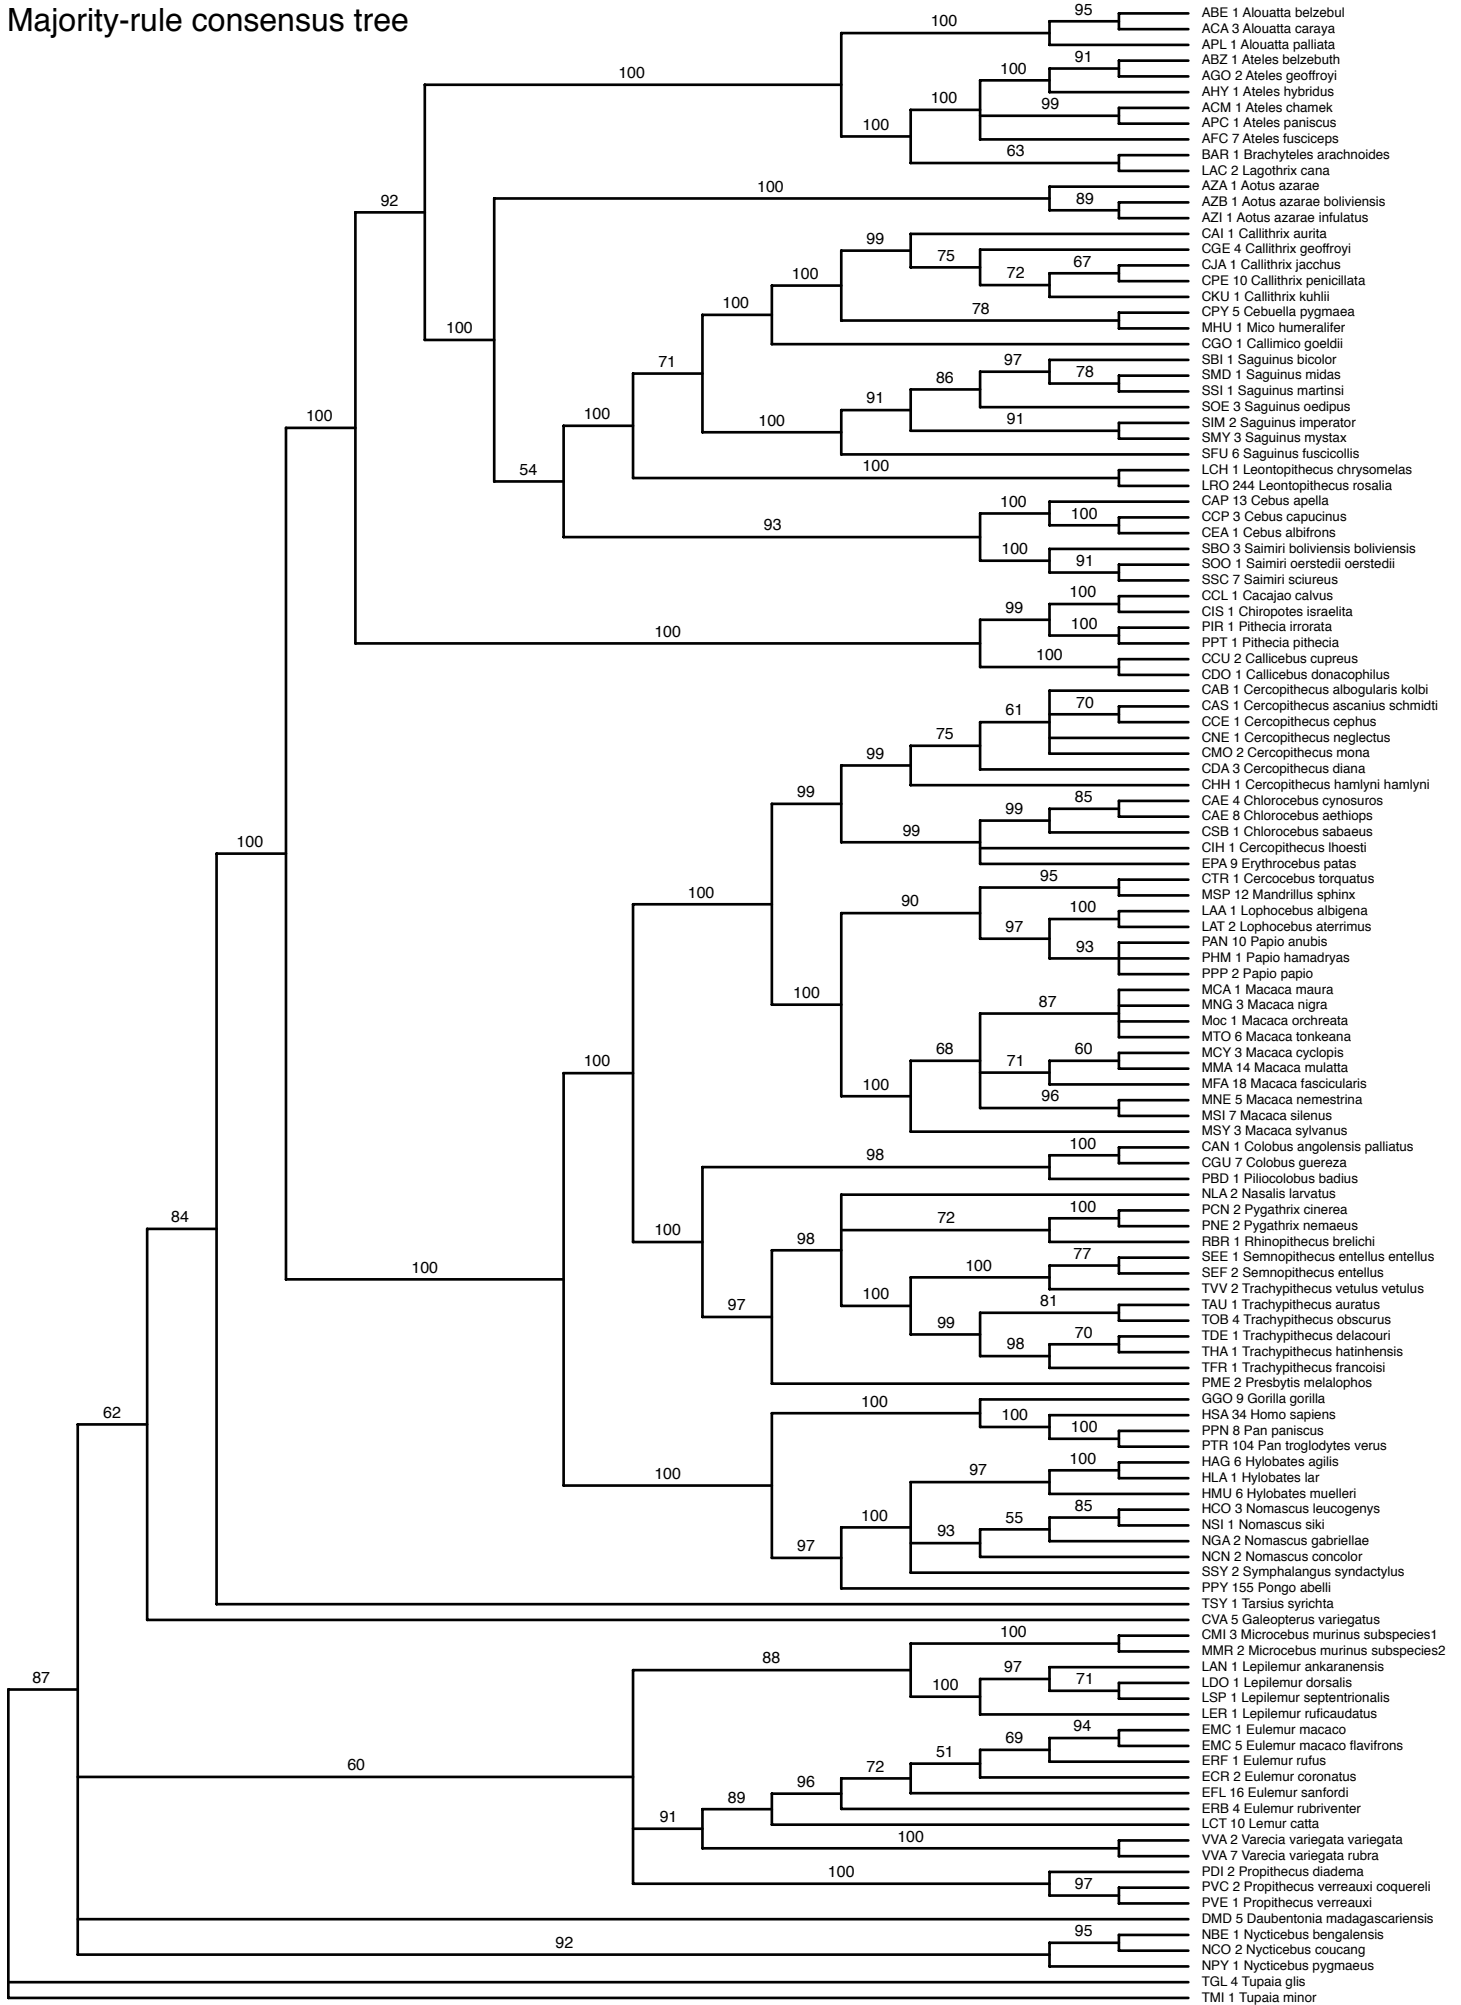

Supplement: pgen.1001342.s013.pdf [file pgen.1001342.s013.pdf]
